# Supplementary material for: The wiring diagram of a glomerular olfactory system
Source: eLife journal article supplement (doi:10.7554/elife.14859), 2016-05-13

# a ORN inputs onto Picky LNs

## ORN groups

- Alcohols
- Esters
- Pyrazines
- Aromatics
- Geranyl acetate
- Iridomyrmecin
- Unknown

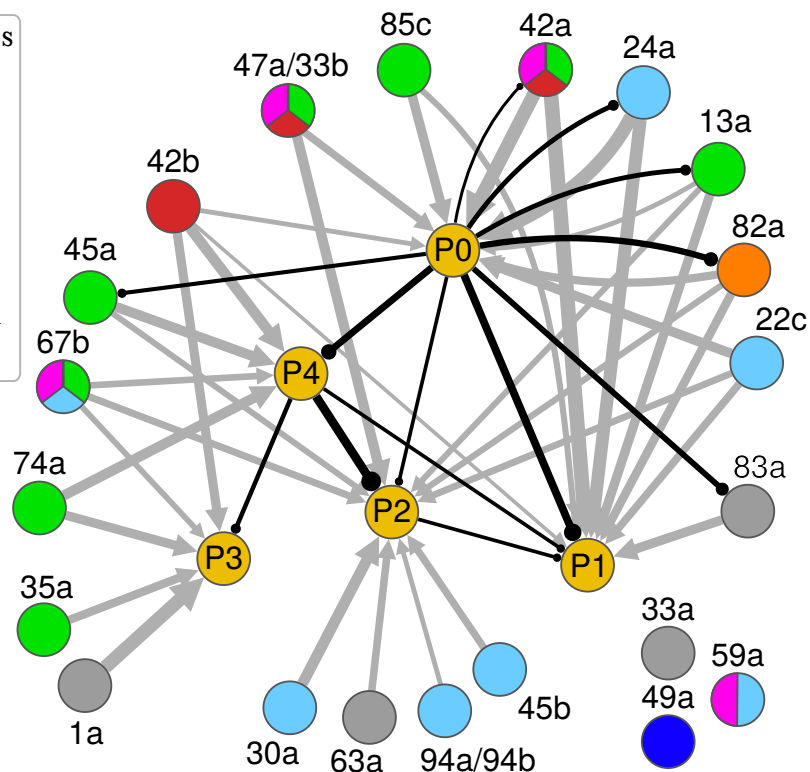

# b ORN inputs onto Picky LN axons or dendrites

(Inputs from ORN to Picky dend. - Inputs from ORN to Picky axon)  
(Inputs from ORN to Picky dend. + Inputs from ORN to Picky axon)

|         |      | picky LN 0 | picky LN 1 | picky LN 2 | picky LN 3 | picky LN 4 |
|---------|------|------------|------------|------------|------------|------------|
| RIGHT   |      |            |            |            |            |            |
| 1a      |      |            |            |            | 1          | 1          |
| 13a     |      |            | 1          | -1         |            |            |
| 22c     | 0.45 |            | -1         | 1          |            |            |
| 24a     | -0   |            | 1          |            |            |            |
| 30a     |      |            |            | 1          |            | 1          |
| 33a     |      |            |            |            |            |            |
| 35a     |      |            |            |            | 1          | 1          |
| 42a     | 0.45 |            | 1          |            |            | 1          |
| 42b     | 1    |            | 1          |            | 1          | 1          |
| 45a     |      |            |            | -0.1       |            | -1         |
| 45b     |      |            |            | 1          |            |            |
| 47a/33b | 1    |            |            | 1          |            |            |
| 49a     |      |            |            |            |            |            |
| 59a     |      |            |            | 1          |            |            |
| 63a     |      |            |            | 1          |            |            |
| 67b     |      |            |            | 1          | -0.7       | 1          |
| 74a     |      |            |            |            | 1          | 1          |
| 82a     | 0.2  |            | -1         | 1          |            |            |
| 83a     | -1   |            | 1          |            |            |            |
| 85c     | 1    |            | -1         |            |            | 1          |
| 94a/94b |      |            |            | 1          |            |            |

| How an ORN Connects: |       |
|----------------------|-------|
| Only to axon         | -1    |
|                      | -0.75 |
|                      | -0.5  |
|                      | -0.25 |
| Evenly to both       | 0     |
|                      | 0.25  |
|                      | 0.5   |
|                      | 0.75  |
| Only to dendrites    | 1     |

# c Picky LN hierarchy with axon/dendrite split

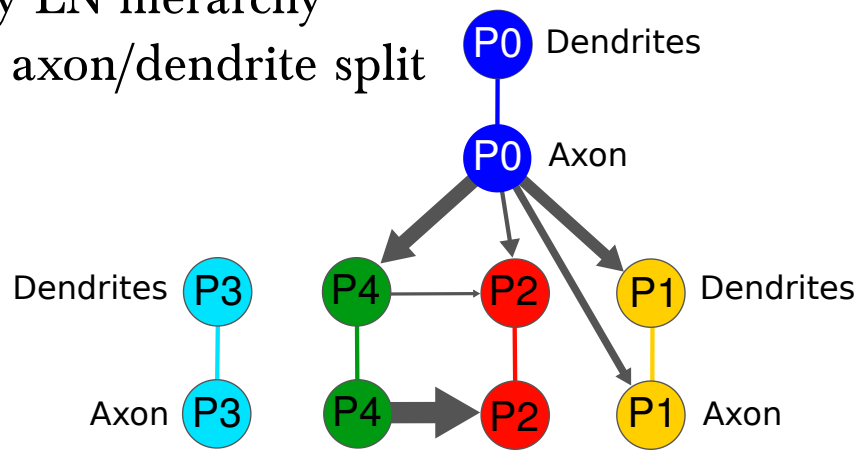

Supplement: supp [file elife-14859-supp-v1.zip]
