# Supplementary material for: The wiring diagram of a glomerular olfactory system
Source: eLife journal article supplement (doi:10.7554/elife.14859), 2016-05-13
Supplement: supp [file elife-14859-supp-v1.zip]

| Right Antennal Lobe  |                   | uPNs |     |     |     |     |     |       |       |     |     |     |     |         |     |     |     |     |     |     |     |     |         |                   |                   | LNs             |               |            |            |            |            |            |            |    |  |
|----------------------|-------------------|------|-----|-----|-----|-----|-----|-------|-------|-----|-----|-----|-----|---------|-----|-----|-----|-----|-----|-----|-----|-----|---------|-------------------|-------------------|-----------------|---------------|------------|------------|------------|------------|------------|------------|----|--|
|                      |                   | 1a   | 13a | 22c | 24a | 30a | 33a | 35a L | 35a R | 42a | 42b | 45a | 45b | 47a/33b | 49a | 59a | 63a | 67b | 74a | 82a | 83a | 85c | 94a/94b | Broad LN Trio (3) | Broad LN Duet (2) | Keystone LN (2) | Choosy LN (2) | Ventral LN | Picky LN 0 | Picky LN 1 | Picky LN 2 | Picky LN 3 | Picky LN 4 |    |  |
| ORNs                 | 1a                | 55   |     |     |     |     |     |       |       |     |     |     |     |         |     |     |     |     |     |     |     |     |         | 1                 | 3                 |                 |               |            |            |            |            | 16         | 3          |    |  |
|                      | 13a               |      | 59  |     |     |     |     |       |       |     |     |     |     |         |     |     |     |     |     |     |     |     |         | 3                 | 4                 | 2               | 7             |            | 29         |            | 2          | 7          | 3          |    |  |
|                      | 22c               |      |     | 48  |     |     |     |       |       |     |     |     |     |         |     |     |     |     |     |     |     |     |         | 4                 | 6                 | 2               | 1             |            |            | 9          | 5          | 4          |            |    |  |
|                      | 24a               |      |     |     | 48  |     |     |       |       |     |     |     |     |         |     |     |     |     |     |     |     |     |         | 2                 | 4                 | 3               |               | 6          | 16         | 14         |            |            |            |    |  |
|                      | 30a               |      |     |     |     | 69  |     |       |       |     |     |     |     |         |     |     |     |     |     |     |     |     |         | 1                 | 1                 | 2               |               |            |            |            | 11         |            | 4          |    |  |
|                      | 33a               |      |     |     |     |     | 66  |       |       |     |     |     | 2   |         |     |     |     |     |     |     |     |     |         | 1                 | 1                 |                 |               |            |            |            |            |            |            |    |  |
|                      | 35a               |      |     |     |     |     |     | 40    | 45    |     |     |     |     |         |     |     |     |     | 3   |     |     |     |         | 3                 | 2                 | 4               |               |            |            |            |            | 6          | 2          |    |  |
|                      | 42a               |      |     |     |     |     |     |       |       | 50  |     |     |     |         |     |     |     |     |     |     |     |     |         | 3                 | 3                 | 4               |               |            | 16         | 18         |            |            | 1          |    |  |
|                      | 42b               |      |     |     |     |     |     |       |       |     | 48  |     |     |         |     |     |     |     |     |     |     |     |         | 2                 | 3                 | 3               |               |            |            | 2          | 1          |            | 7          | 10 |  |
|                      | 45a               |      |     |     |     |     | 3   |       |       |     |     | 58  |     |         |     |     |     |     |     | 6   |     |     |         | 2                 | 1                 | 2               | 2             |            |            |            |            | 3          |            | 9  |  |
|                      | 45b               |      |     |     |     |     |     |       |       |     |     |     |     | 44      |     |     |     | 1   |     |     |     |     |         | 2                 | 2                 |                 | 1             |            |            |            |            | 5          |            |    |  |
|                      | 47a/33b           |      |     |     |     |     |     |       |       |     |     |     | 15  | 60      |     |     |     |     |     |     |     |     |         | 2                 | 4                 | 1               |               |            | 5          |            | 9          |            |            |    |  |
|                      | 49a               |      |     |     |     |     |     |       |       |     |     |     |     |         | 46  |     |     |     |     |     |     |     |         | 2                 | 4                 |                 |               |            |            |            |            |            |            |    |  |
|                      | 59a               |      |     |     |     |     |     |       |       |     |     |     |     |         |     | 64  | 2   |     |     |     |     |     |         | 2                 | 4                 | 2               | 1             |            |            |            |            | 2          |            |    |  |
|                      | 63a               |      |     |     |     |     |     |       |       |     |     |     |     |         |     |     | 49  |     |     |     |     |     |         | 3                 | 5                 | 1               | 1             |            |            |            | 5          |            |            |    |  |
|                      | 67b               |      |     |     |     |     |     |       |       |     |     |     |     |         |     |     |     | 53  |     |     |     |     |         | 2                 | 5                 | 2               |               |            |            |            | 4          | 3          | 4          |    |  |
|                      | 74a               |      |     |     |     |     |     |       |       |     |     |     |     |         |     |     |     |     | 62  |     |     |     |         | 2                 | 5                 | 4               |               |            |            |            | 7          |            | 9          |    |  |
| 82a                  |                   |      | 5   |     |     |     |     |       |       |     | 3   |     |     |         |     |     |     |     |     | 34  |     |     | 1       | 2                 | 2                 | 6               |               | 6          | 6          | 4          |            |            |            |    |  |
| 83a                  |                   |      |     |     |     |     |     |       | 1     |     |     |     |     |         |     |     |     |     |     |     | 62  | 8   |         | 1                 | 1                 | 1               |               | 2          | 7          |            |            |            |            |    |  |
| 85c                  |                   |      |     |     |     |     |     |       |       |     |     |     |     |         |     |     |     |     |     |     |     | 47  |         | 3                 | 5                 | 1               | 1             | 7          | 3          |            |            | 2          |            |    |  |
| 94a/94b              |                   |      |     |     |     |     |     |       |       |     |     |     |     | 5       |     |     |     |     |     |     |     |     |         | 2                 | 1                 | 2               | 8             |            |            |            | 2          |            |            |    |  |
| % ORN Input          |                   | 55   | 59  | 54  | 48  | 69  | 69  | 40    | 45    | 51  | 48  | 61  | 61  | 65      | 46  | 64  | 52  | 53  | 65  | 40  | 62  | 55  | 45      | 44                | 65                | 38              | 28            | 35         | 64         | 62         | 53         | 39         | 42         |    |  |
| LNs                  | Broad LN Trio (3) | 3    | 6   | 10  | 11  | 3   | 6   | 5     | 10    | 5   | 6   | 2   | 11  | 4       | 7   | 8   | 9   | 10  | 8   |     | 7   | 7   | 13      | 14                | 6                 | 12              | 6             | 7          | 4          | 7          | 4          | 8          | 3          |    |  |
|                      | Broad LN Duet (2) | 24   | 16  | 20  | 18  | 15  | 9   | 2     | 2     | 9   | 15  | 17  | 20  | 20      | 34  | 18  | 30  | 18  | 14  | 13  | 13  | 27  | 14      | 2                 | 3                 | 1               | 5             | 3          | 9          | 5          | 4          | 4          | 2          |    |  |
|                      | Keystone LN (2)   |      |     |     | 5   |     |     | 2     | 1     | 10  | 11  |     |     |         |     | 3   |     |     |     |     | 2   |     | 1       | 5                 | 1                 |                 | 5             |            | 2          | 6          | 4          | 1          | 2          |    |  |
|                      | Choosy LNs (2)    |      | 9   | 6   | 2   | 4   |     | 8     | 8     | 7   | 2   | 5   |     |         | 6   | 3   | 3   |     | 3   | 20  | 10  | 9   | 12      |                   | 2                 |                 | 3             |            | 1          | 4          | 1          |            | 2          |    |  |
|                      | Ventral LN        |      | 4   |     | 2   |     |     |       | 2     | 1   |     |     |     |         |     |     |     |     | 4   |     |     |     |         | 1                 | 1                 | 1               | 4             |            | 2          | 3          | 6          |            | 4          |    |  |
|                      | Picky LN 0        |      | 4   | 2   | 5   |     |     |       |       | 7   | 5   | 2   |     |         |     |     |     |     |     |     |     |     |         | 1                 | 1                 | 8               | 2             | 4          |            | 5          | 1          |            | 4          |    |  |
|                      | Picky LN 1        |      | 1   |     |     |     |     |       |       |     |     |     |     |         |     |     |     |     |     |     |     |     |         |                   | 1                 | 1               |               |            |            | 1          |            |            |            |    |  |
|                      | Picky LN 2        |      |     |     |     |     |     |       |       |     |     |     |     |         |     |     |     |     |     |     |     |     |         |                   |                   |                 |               |            |            |            | 1          |            |            |    |  |
| Picky LN 3           |                   |      |     |     |     |     |     |       |       |     |     |     |     |         |     |     | 2   |     |     |     |     |     |         |                   |                   |                 |               |            |            |            |            |            |            |    |  |
| Picky LN 4           |                   |      |     |     |     | 1   | 7   |       |       |     | 4   |     |     |         |     |     |     |     |     | 4   | 1   |     |         |                   |                   | 3               | 4             |            | 1          | 7          | 2          |            |            |    |  |
| % LN Input           |                   | 27   | 39  | 38  | 43  | 22  | 15  | 18    | 28    | 39  | 39  | 31  | 31  | 24      | 47  | 31  | 42  | 37  | 29  | 37  | 34  | 42  | 39      | 22                | 16                | 22              | 32            | 17         | 19         | 31         | 27         | 15         | 18         |    |  |
| % ORN+LN Input       |                   | 82   | 98  | 92  | 91  | 92  | 84  | 58    | 73    | 91  | 88  | 92  | 91  | 89      | 93  | 95  | 94  | 89  | 94  | 77  | 96  | 97  | 85      | 66                | 81                | 60              | 59            | 51         | 83         | 93         | 80         | 54         | 60         |    |  |
| Desc. and Modulatory | Descending        |      |     |     |     | 3   |     |       |       |     |     |     |     |         |     |     |     |     |     |     |     |     |         |                   |                   |                 | 1             |            |            | 1          | 1          |            |            |    |  |
|                      | CSD (2)           |      |     |     |     |     | 1   |       |       |     |     |     |     |         |     |     |     |     |     |     |     |     |         |                   | 1                 | 3               |               |            |            |            |            | 1          | 1          |    |  |
|                      | IAL-1 (2)         |      |     |     |     |     |     | 1     | 1     |     |     |     |     |         |     |     |     | 1   |     |     |     |     |         | 2                 | 1                 |                 | 1             | 5          | 2          |            |            | 3          | 1          |    |  |
|                      | tdc (2)           |      |     |     |     |     |     |       |       |     |     |     |     |         |     |     |     | 3   |     |     |     |     |         | 2                 |                   |                 |               |            |            |            | 1          |            |            |    |  |
