# Supplementary material for: The wiring diagram of a glomerular olfactory system
Source: eLife journal article supplement (doi:10.7554/elife.14859), 2016-05-13
Supplement: supp [file elife-14859-supp-v1.zip]

a

| Cluster 1: Alcohols                                                                                         | Cluster 2: Esters                                                                                                                               | Cluster 3: Pyrazines                                                                                                                                    | Cluster 4: Aromatics 1                                | Cluster 5: Aromatics 2                                                                       |
|-------------------------------------------------------------------------------------------------------------|-------------------------------------------------------------------------------------------------------------------------------------------------|---------------------------------------------------------------------------------------------------------------------------------------------------------|-------------------------------------------------------|----------------------------------------------------------------------------------------------|
| 1-butanol<br>1-hexanol<br>1-octen-3-ol<br>1-heptanol<br>3-octanol<br>1-nonanol<br>E2-hexenal<br>2-heptanone | Ethyl acetate<br>Propyl acetate<br>Pentyl acetate<br>Isopentyl acetate<br>Ethyl butyrate<br>Geranyl acetate<br>Propanoic acid<br>Carbon dioxide | 2-ethylpyrazine<br>2-methoxypyrazine<br>2,3-diethylpyrazine<br>2-Isobutyl-3-methoxypyrazine<br>2,3-dimethylpyrazine<br>2,5-dymethylpyrazine<br>Pyrazine | Methyl salicylate<br>2-methylphenol<br>4-methylphenol | Benzaldehyde<br>Acetophenone<br>Anisole<br>Methyleugenol<br>2,3-butanedione<br>cyclohexanone |

The color code is Alcohols, Esters, Pyrazines, Aromatics, Others

b

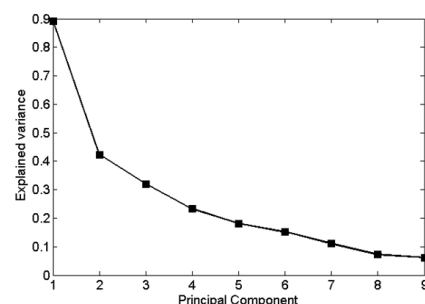

c

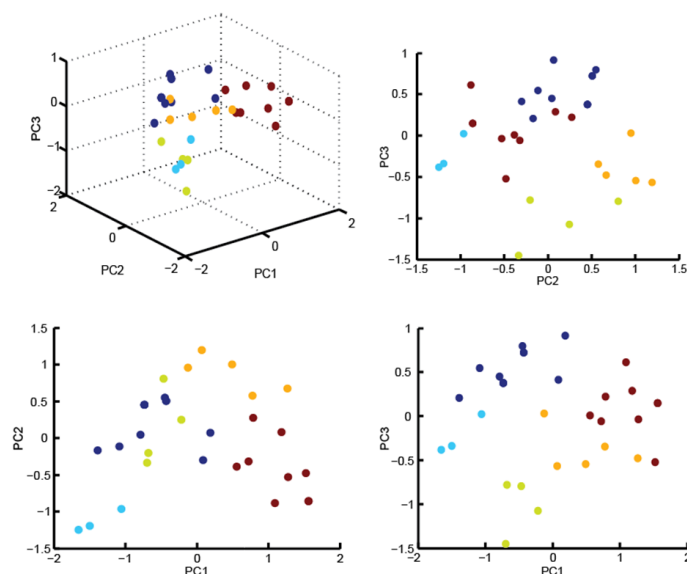

d

| Cluster 1: Alcohols                                                                                                               | Cluster 2: Esters                                                                         | Cluster 3: Pyrazines                                                                 | Cluster 4: Aromatics                    | Cluster 5: Mixed                                                                                                                                                                                              |
|-----------------------------------------------------------------------------------------------------------------------------------|-------------------------------------------------------------------------------------------|--------------------------------------------------------------------------------------|-----------------------------------------|---------------------------------------------------------------------------------------------------------------------------------------------------------------------------------------------------------------|
| 1-butanol<br>1-hexanol<br>1-octen-3-ol<br>1-heptanol<br>3-octanol<br>E2-hexenal<br>2-heptanone<br>cyclohexanone<br>Pentyl acetate | Ethyl acetate<br>Propyl acetate<br>Isopentyl acetate<br>Ethyl butyrate<br>2,3-butanedione | 2-ethylpyrazine<br>2-methoxypyrazine<br>2,3-dimethylpyrazine<br>2,5-dymethylpyrazine | Benzaldehyde<br>Acetophenone<br>Anisole | 1-nonanol<br>Pyrazine<br>2,3-diethylpyrazine<br>2-Isobutyl-3-methoxypyrazine<br>Methyl salicylate<br>2-methylphenol<br>4-methylphenol<br>Methyleugenol<br>Geranyl acetate<br>Propanoic acid<br>Carbon dioxide |

e

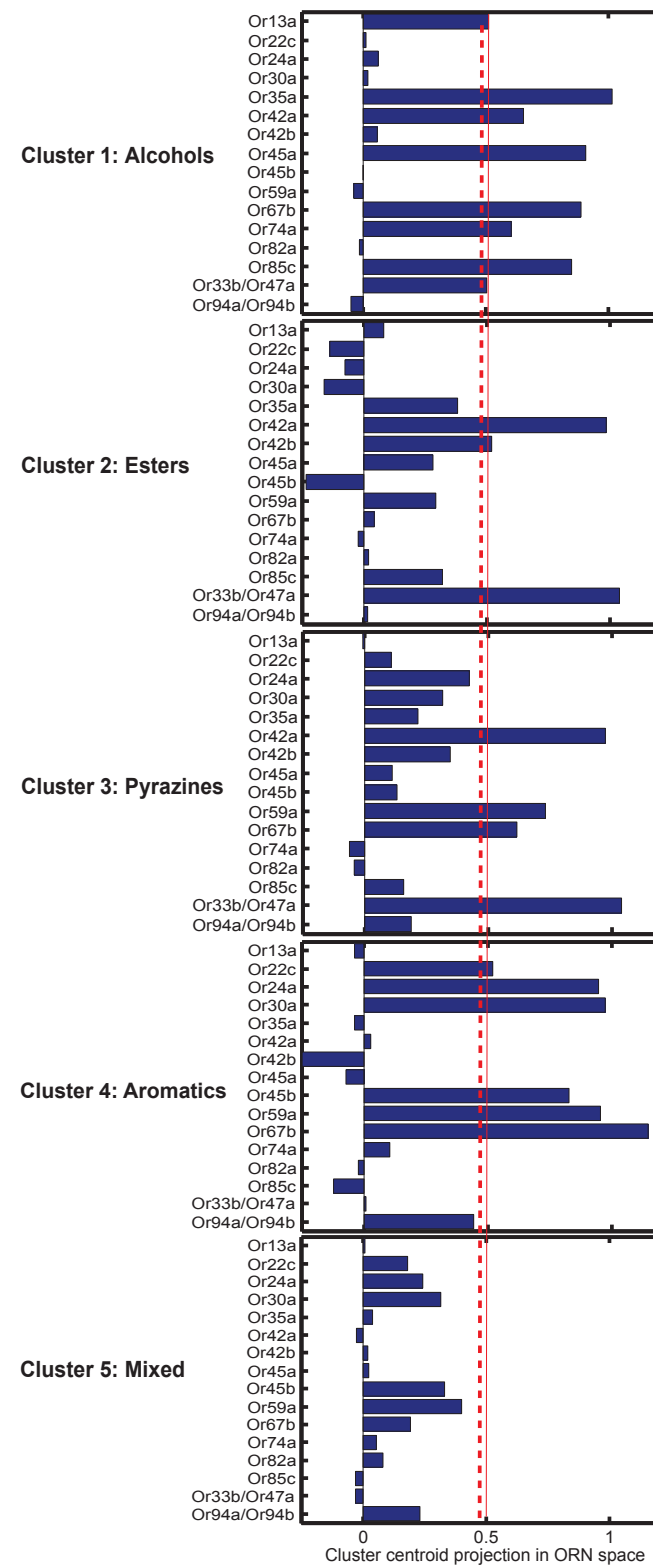

Or13a  
Or35a  
Or42a  
Or45a  
Or67b  
Or74a  
Or85c  
Or33b/Or47a

Or42a  
Or42b  
Or33b/Or47a

Or42a  
Or59a  
Or67b  
Or33b/Or47a

Or22c  
Or24a  
Or30a  
Or45b  
Or59a  
Or67b

None
