# Supplementary material for: The wiring diagram of a glomerular olfactory system
Source: eLife journal article supplement (doi:10.7554/elife.14859), 2016-05-13
Supplement: supp [file elife-14859-supp-v1.zip]

| Right Antennal Lobe  |                   | mPNs |    |    |    |    |    |    |    |              |              |              |              |       |       |    |       |          | LNs               |                   |                 |               |            |            |            |            |            |            |   |
|----------------------|-------------------|------|----|----|----|----|----|----|----|--------------|--------------|--------------|--------------|-------|-------|----|-------|----------|-------------------|-------------------|-----------------|---------------|------------|------------|------------|------------|------------|------------|---|
|                      |                   | A1   | A2 | A3 | B1 | B2 | B3 | C1 | C2 | bil.-lower L | bil.-lower R | bil.-upper L | bil.-upper R | VUM L | VUM R | D  | cobra | seahorse | Broad LN Trio (3) | Broad LN Duet (2) | Keystone LN (2) | Choosy LN (2) | Ventral LN | Picky LN 0 | Picky LN 1 | Picky LN 2 | Picky LN 3 | Picky LN 4 |   |
| Glomeruli (ORN+uPN)  | 1a                | 1    |    |    |    |    |    |    |    |              |              |              |              |       |       |    | 11    |          | 1                 | 3                 |                 |               |            |            |            |            |            | 16         | 3 |
|                      | 13a               | 3    |    |    |    |    | 1  | 1  |    |              |              |              |              |       |       |    |       |          | 4                 | 4                 | 3               | 7             | 34         | 2          | 8          | 3          |            |            |   |
|                      | 22c               | 1    |    | 2  |    |    |    |    |    | 2            | 2            |              |              |       |       | 1  |       |          | 5                 | 7                 | 3               | 1             |            | 9          | 5          | 5          |            |            |   |
|                      | 24a               | 3    |    |    |    |    |    |    |    |              |              |              |              |       |       |    |       | 1        | 4                 | 4                 | 4               | 1             | 6          | 16         | 14         |            |            |            |   |
|                      | 30a               | 6    | 2  |    |    | 11 |    | 4  |    | 2            | 3            |              |              |       |       |    |       |          | 2                 | 2                 | 2               |               |            |            |            | 11         |            | 5          |   |
|                      | 33a               |      |    | 6  |    |    | 5  |    |    | 7            | 6            | 6            | 7            |       |       |    |       |          | 1                 | 1                 |                 |               |            |            |            |            |            |            |   |
|                      | 35a               | 2    |    |    |    | 14 |    | 4  |    |              |              |              |              |       |       |    |       | 3        | 3                 | 2                 | 4               |               |            |            |            |            | 6          | 2          |   |
|                      | 42a               | 5    |    |    |    |    |    |    |    |              |              |              |              | 4     | 4     |    | 1     |          | 4                 | 4                 | 6               |               |            | 16         | 19         |            |            | 1          |   |
|                      | 42b               | 6    |    |    |    | 1  |    |    |    |              |              |              |              | 3     | 3     |    | 7     |          | 4                 | 3                 | 5               |               |            | 2          | 1          |            | 7          | 13         |   |
|                      | 45a               | 4    |    |    |    | 5  | 2  |    |    | 4            | 2            | 1            | 2            |       |       | 10 |       |          | 2                 | 1                 | 3               | 2             |            |            |            | 3          |            | 9          |   |
|                      | 45b               |      | 2  |    |    |    | 4  |    |    | 4            | 5            | 1            | 2            |       |       | 1  | 1     |          | 3                 | 3                 |                 | 1             |            |            |            | 5          |            |            |   |
|                      | 47a/33b           | 5    |    |    |    |    |    |    |    | 7            | 11           |              |              |       |       | 20 |       |          | 3                 | 5                 | 1               |               |            | 5          |            | 9          |            |            |   |
|                      | 49a               | 1    | 1  |    |    | 5  | 8  |    |    | 3            | 5            |              |              |       |       |    |       |          | 3                 | 5                 |                 | 1             |            |            |            |            |            |            |   |
|                      | 59a               | 3    |    |    |    | 10 | 5  |    |    | 2            | 1            | 1            | 1            |       |       |    |       |          | 3                 | 4                 | 2               | 1             |            |            |            | 2          |            |            |   |
|                      | 63a               | 3    |    |    |    |    |    |    |    | 7            | 4            |              |              |       |       | 6  |       |          | 4                 | 6                 | 1               | 2             |            |            |            | 6          |            |            |   |
|                      | 67b               | 5    |    |    |    | 7  |    |    | 1  | 2            | 4            |              |              |       |       |    |       |          | 4                 | 6                 | 2               | 3             |            |            |            | 4          | 4          | 4          |   |
|                      | 74a               | 2    |    |    | 4  | 4  |    | 6  | 3  |              |              |              |              |       |       |    |       | 3        | 4                 | 6                 | 5               |               |            |            |            |            | 7          | 9          |   |
|                      | 82a               | 1    |    | 8  |    |    | 1  |    |    |              |              |              |              | 3     | 6     |    | 16    |          | 1                 | 2                 | 2               | 6             |            | 6          | 6          | 4          |            |            |   |
|                      | 83a               | 2    | 3  |    |    |    |    |    |    |              |              |              |              |       |       |    | 5     |          | 2                 | 2                 | 1               |               |            | 2          | 7          |            |            |            |   |
| 85c                  | 6                 | 4    |    |    | 1  |    |    |    |    |              |              |              |              |       | 11    |    |       | 5        | 5                 | 2                 | 2               |               | 9          | 3          |            |            | 2          |            |   |
| 94a/94b              |                   |      |    |    | 4  |    |    |    | 9  | 9            | 1            | 1            |              |       | 6     |    | 31    |          | 3                 | 1                 | 3               | 9             |            |            |            | 2          |            |            |   |
| % ORN+uPN input      |                   | 59   | 11 | 16 | 4  | 61 | 25 | 14 | 5  | 48           | 50           | 11           | 12           | 9     | 13    | 55 | 32    | 47       | 64                | 76                | 48              | 37            | 40         | 67         | 63         | 55         | 41         | 47         |   |
| LNs                  | Broad LN Trio (3) | 4    | 1  | 2  |    | 5  | 6  | 1  | 3  | 4            | 5            | 8            | 6            |       |       | 7  | 4     | 2        | 14                | 6                 | 12              | 6             | 7          | 4          | 7          | 4          | 8          | 3          |   |
|                      | Broad LN Duet (2) | 2    | 1  | 2  |    | 1  | 3  |    | 7  | 2            | 2            | 22           | 22           | 8     | 6     | 4  | 2     |          | 2                 | 3                 | 1               | 5             | 3          | 9          | 5          | 4          | 4          | 2          |   |
|                      | Keystone LN (2)   |      |    |    | 1  | 3  |    |    |    | 1            | 1            |              |              | 1     | 2     | 9  |       | 6        | 5                 | 1                 |                 | 5             |            | 2          | 6          | 4          | 1          | 2          |   |
|                      | Choosy LN (2)     |      |    | 4  | 3  | 6  | 2  |    | 1  | 1            | 1            | 4            | 8            |       |       |    | 1     |          |                   | 2                 |                 | 3             |            | 1          | 4          | 1          |            | 2          |   |
|                      | Ventral LN        |      |    |    | 4  | 1  |    |    |    |              |              |              |              |       |       |    |       | 7        | 1                 | 1                 | 1               | 4             |            | 2          | 3          | 6          |            | 4          |   |
|                      | Picky LN 0        | 2    |    | 8  |    |    |    | 4  |    |              |              |              |              | 2     | 2     |    | 2     | 2        | 1                 | 1                 | 8               | 2             | 4          |            | 5          | 1          |            | 4          |   |
|                      | Picky LN 1        | 3    |    | 6  |    |    | 1  |    |    | 16           | 12           | 6            | 5            | 3     | 4     |    |       | 2        |                   | 1                 | 1               | 2             |            |            |            |            |            |            |   |
|                      | Picky LN 2        |      | 1  | 5  |    |    | 3  |    |    | 1            | 2            | 6            | 9            | 4     | 3     | 1  | 10    |          |                   |                   |                 | 1             |            |            | 1          |            |            |            |   |
|                      | Picky LN 3        | 7    |    |    |    | 4  |    |    |    |              |              |              |              |       |       |    |       |          |                   |                   | 2               |               |            |            |            |            |            |            |   |
| Picky LN 4           |                   | 25   | 4  |    | 3  | 17 | 1  |    | 3  | 3            | 4            | 4            | 2            | 8     | 6     | 12 | 3     |          | 1                 |                   | 3               | 4             |            | 1          | 7          | 2          |            |            |   |
| % LN Input           |                   | 18   | 28 | 32 | 8  | 22 | 32 | 3  | 15 | 27           | 25           | 49           | 54           | 20    | 25    | 26 | 31    | 23       | 22                | 16                | 22              | 32            | 17         | 19         | 31         | 27         | 15         | 18         |   |
| % ORN+uPN+LN input   |                   | 77   | 39 | 48 | 12 | 84 | 57 | 17 | 20 | 75           | 75           | 61           | 66           | 29    | 38    | 81 | 63    | 69       | 87                | 92                | 70              | 69            | 57         | 86         | 94         | 82         | 56         | 65         |   |
| Desc. and Modulatory | Descending        |      | 1  | 2  |    |    | 8  | 1  |    | 6            | 4            | 6            | 1            | 2     | 3     |    | 2     |          |                   |                   |                 | 1             |            |            | 1          | 1          |            |            |   |
|                      | CSD (2)           |      | 2  |    |    | 5  |    |    | 1  | 5            |              |              |              |       |       |    | 1     |          |                   | 1                 | 3               |               |            |            |            |            | 1          | 1          |   |
|                      | IAL-1 (2)         |      | 2  |    |    |    | 1  |    |    |              |              |              |              |       |       |    |       | 2        |                   | 2                 |                 | 1             | 5          | 2          |            |            | 3          | 1          |   |
|                      | tdc (2)           |      |    |    |    | 1  |    | 2  |    |              |              | 1            | 1            | 1     | 2     |    |       |          |                   |                   |                 |               |            |            |            |            | 1          |            |   |
