# Supplementary material for: The wiring diagram of a glomerular olfactory system
Source: eLife journal article supplement (doi:10.7554/elife.14859), 2016-05-13
Supplement: supp [file elife-14859-supp-v1.zip]

SEZ interneurons

POSTERIOR VIEW

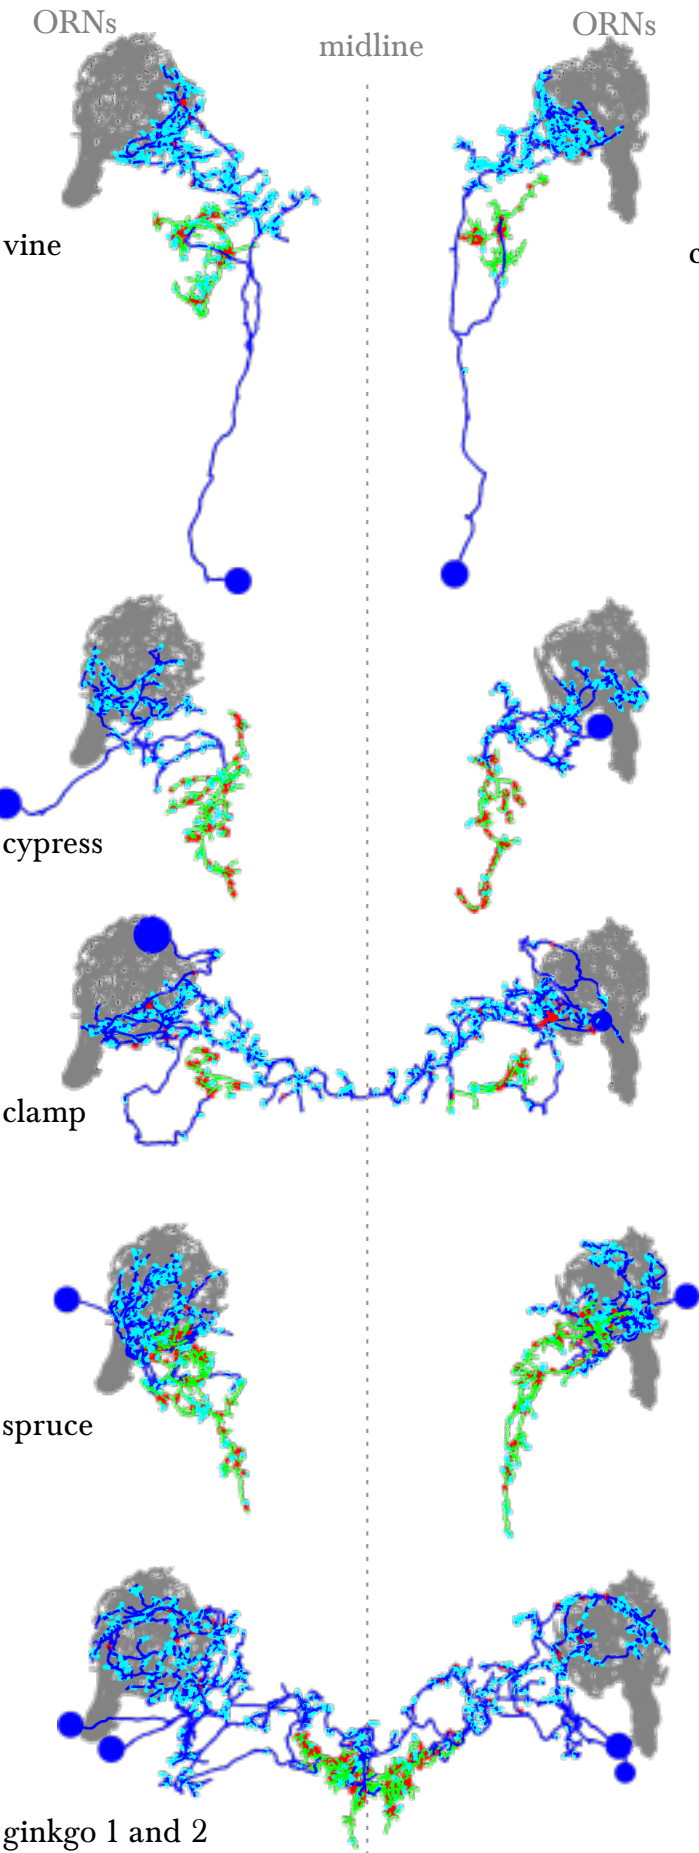

LATERAL VIEW

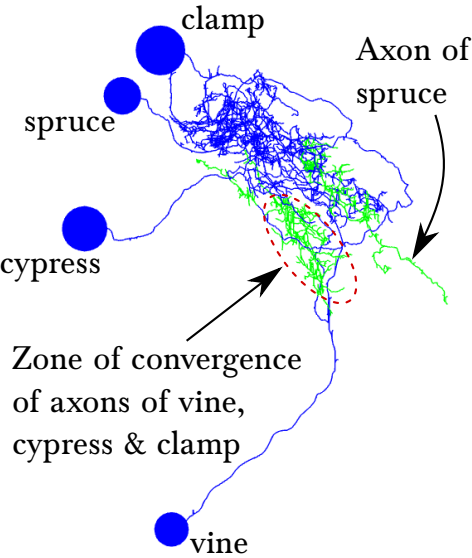

axon  
dendrite  
presynaptic site  
postsynaptic site

| Right antennal lobe     |                    | SEZ interneurons |         |       |        |          |          |
|-------------------------|--------------------|------------------|---------|-------|--------|----------|----------|
|                         |                    | vine             | cypress | clamp | spruce | ginkgo 1 | ginkgo 2 |
| ORNs + uPNs             | 1a                 | 4                |         |       |        |          |          |
|                         | 13a                |                  |         |       |        |          |          |
|                         | 22c                |                  |         |       |        |          |          |
|                         | 24a                |                  |         |       |        |          |          |
|                         | 30a                |                  | 14      |       | 6      |          |          |
|                         | 33a                |                  |         |       |        |          |          |
|                         | 35a                | 12               |         | 3     |        |          |          |
|                         | 42a                |                  |         |       |        |          |          |
|                         | 42b                | 11               |         |       |        |          |          |
|                         | 45a                |                  |         |       |        | 9        | 6        |
|                         | 45b                |                  |         |       |        |          |          |
|                         | 47a/33b            |                  |         |       | 8      |          | 4        |
|                         | 49a                |                  |         |       |        |          |          |
|                         | 59a                |                  |         |       |        |          |          |
|                         | 63a                |                  |         |       |        |          |          |
|                         | 67b                |                  | 8       |       | 8      |          |          |
|                         | 74a                |                  |         |       |        |          |          |
|                         | 82a                |                  |         |       |        |          |          |
|                         | 83a                |                  |         |       |        |          |          |
|                         | 85c                |                  |         |       |        |          |          |
|                         | 94a/94b            |                  |         |       | 1      |          |          |
| %ORN Input              |                    | 27               | 22      | 3     | 24     | 9        | 10       |
| LNs                     | Broad LN trio (3)  | 4                | 2       |       | 1      |          |          |
|                         | Broad LN duet (2)  | 1                |         |       |        |          | 3        |
|                         | Keystone LN (2)    |                  | 2       |       |        |          |          |
|                         | Choosy LN (2)      | 7                | 1       | 2     |        | 9        |          |
|                         | Ventral LN         |                  |         | 2     |        |          |          |
|                         | Picky LN 0         |                  |         |       |        |          |          |
|                         | Picky LN 1         |                  |         |       |        |          |          |
|                         | Picky LN 2         | 2                |         |       |        |          | 10       |
|                         | Picky LN 3         |                  | 12      | 2     | 12     |          | 4        |
|                         | Picky LN 4         | 2                |         |       |        | 9        | 4        |
| %LN Input               |                    | 17               | 16      | 5     | 14     | 18       | 20       |
| Descending & modulatory | Descending CSD (2) |                  |         |       |        |          |          |
|                         | IAL-1 (2)          | 2                |         |       |        |          |          |
|                         | tdc (2)            |                  | 3       |       |        |          |          |
