# Supplementary material for: The wiring diagram of a glomerular olfactory system
Source: eLife. 2016 May 13;5:e14859. doi: 10.7554/eLife.14859 (PMC4930330; doi:10.7554/eLife.14859)
Supplement: Supplementary file 1. — DOI: http://dx.doi.org/10.7554/eLife.14859.019 [file elife-14859-supp1.xlsx]

## Sheet: LEFT CONNECTIVITY FOR 1ST SUBMI
	1a ORN left	13a ORN left	22c ORN left	24a ORN left	30a ORN left	33a ORN left	35a ORN left	42a ORN left	42b ORN left	45a ORN left	45b ORN left	47a & 33b ORN left	49a ORN left	59a ORN left	63a ORN left	67b ORN left	74a ORN left	82a ORN left	83a ORN left	85c ORN left	94a & 94b ORN left		1a PN left	13a PN left	22c PN left	24a PN left	30a PN left	33a PN left	35a PN bilateral left	35a PN bilateral right	42a PN left	42b PN left	45a PN left	45b PN left	47a & 33b PN left	49a PN left	59a PN left	63a PN left	67b PN left	74a PN left	82a PN left	83a PN left	85c PN left	94a & 94b PN left		Broad T1 left	Broad T2 left	Broad T3 left	Broad D1 left
1a ORN left	0	0	0	0	0	0	0	0	0	0	0	0	0	0	0	0	0	0	0	0	0		44	0	0	0	0	0	0	0	1	1	0	0	0	0	1	0	0	0	0	9	0	0		18	5	6	20
13a ORN left	0	0	0	0	0	0	0	0	0	0	0	0	0	0	0	0	0	0	0	0	0		0	70	0	0	0	0	0	0	0	3	0	0	0	0	0	0	0	1	1	0	0	0		43	34	36	8
22c ORN left	0	0	0	0	0	0	0	0	0	0	0	0	0	0	0	0	0	0	0	0	0		0	0	72	0	0	0	0	0	0	0	0	1	0	0	0	0	0	0	0	0	0	0		39	40	22	40
24a ORN left	0	0	0	0	0	0	0	0	0	0	0	0	0	0	0	0	0	0	0	0	0		0	0	1	70	0	0	0	0	0	0	1	0	0	0	0	0	0	0	1	0	0	0		19	17	11	5
30a ORN left	0	0	0	0	0	0	0	0	0	0	0	0	0	0	0	0	0	0	0	0	0		0	0	0	0	66	0	0	0	0	0	0	0	0	0	0	0	3	1	0	0	0	7		6	9	19	12
33a ORN left	0	0	0	0	0	0	0	0	0	1	0	0	0	0	0	0	0	0	0	0	0		0	0	0	0	0	105	0	0	0	0	1	5	1	1	0	1	0	0	0	0	0	0		16	18	13	4
35a ORN left	0	0	0	0	0	0	0	0	0	0	0	0	0	0	0	0	0	0	0	0	0		0	0	0	0	0	0	48	39	0	0	0	0	0	0	0	0	0	3	0	0	0	0		49	53	31	8
42a ORN left	0	0	0	0	0	0	0	0	0	0	0	0	0	0	0	0	0	0	0	0	0		0	0	0	0	0	0	0	0	117	1	0	0	0	0	0	0	0	0	0	1	0	0		27	27	29	6
42b ORN left	0	0	0	0	0	0	0	0	0	0	0	0	0	0	0	0	0	0	0	0	0		0	0	0	0	0	0	0	0	2	89	0	0	0	0	0	0	0	0	0	0	0	0		27	11	25	23
45a ORN left	0	0	0	0	0	0	0	0	0	0	0	0	0	0	0	0	0	0	0	0	0		0	0	0	0	0	5	0	0	0	0	57	2	13	0	0	0	0	0	4	0	0	0		18	16	17	5
45b ORN left	0	0	0	0	0	0	0	0	0	0	0	0	0	0	0	0	0	0	0	0	0		0	0	0	0	0	1	0	0	0	0	0	73	9	0	0	3	0	0	0	0	0	0		17	10	15	13
47a & 33b ORN left	0	0	0	0	0	0	0	0	0	0	0	0	0	0	1	0	0	0	0	0	0		0	0	1	0	0	0	0	0	0	0	0	20	66	1	0	0	0	0	0	0	8	0		37	23	26	13
49a ORN left	0	0	0	0	0	0	0	0	0	0	0	0	0	0	0	0	0	0	0	0	0		0	0	0	0	2	0	0	0	0	0	0	2	0	74	0	1	0	0	0	0	0	1		16	1	27	7
59a ORN left	0	0	0	0	0	0	0	0	0	0	0	0	0	0	0	0	0	0	0	0	0		0	0	0	0	0	2	0	0	0	0	0	3	0	0	72	3	0	0	0	0	3	0		19	26	23	21
63a ORN left	0	0	0	0	0	0	0	0	0	0	0	0	0	0	0	0	0	0	0	0	0		0	0	0	0	0	0	0	0	0	0	0	0	0	0	0	82	0	0	0	0	0	0		32	24	21	14
67b ORN left	0	0	0	0	0	0	0	0	0	0	0	0	0	0	0	0	0	0	0	0	0		0	0	4	0	1	0	0	0	0	0	0	0	0	0	0	0	105	0	0	0	0	5		24	18	23	18
74a ORN left	0	0	0	0	0	0	0	0	0	0	0	0	0	0	0	0	0	0	0	0	0		0	0	0	0	0	0	0	0	0	0	0	0	0	0	0	0	1	95	0	0	0	0		27	23	13	18
82a ORN left	0	1	0	0	0	0	0	0	0	0	0	0	0	0	0	0	0	0	0	0	0		0	1	4	1	0	0	0	0	0	0	13	0	0	0	0	0	0	0	15	0	0	0		13	19	5	6
83a ORN left	0	0	0	0	0	0	0	0	0	0	0	0	0	0	0	0	0	0	0	0	0		1	0	0	0	0	0	0	0	5	0	0	0	0	0	0	0	0	0	0	100	3	0		22	23	10	7
85c ORN left	0	0	0	0	0	0	0	0	0	0	0	0	0	0	0	0	0	0	0	0	0		0	0	0	0	0	0	0	0	0	0	0	0	2	4	0	0	0	0	1	0	72	0		40	23	40	29
94a & 94b ORN left	0	0	0	0	0	0	0	0	0	0	0	0	0	0	0	0	0	0	0	0	0		0	0	0	0	0	0	0	0	0	0	0	1	0	2	0	0	0	0	0	0	0	70		21	19	24	7
1a PN left	0	0	0	0	0	0	0	0	0	0	0	0	0	0	0	0	0	0	0	0	0		0	0	0	0	0	0	0	0	0	0	0	0	1	0	0	0	0	0	1	0	0	0		1	0	0	1
13a PN left	0	0	0	0	0	0	0	0	0	0	0	0	0	0	0	0	0	0	0	0	0		0	0	0	0	0	0	0	0	0	0	0	0	0	0	0	0	0	0	0	0	0	1		9	15	12	0
22c PN left	0	0	0	0	0	0	0	0	0	0	0	0	0	0	0	0	0	0	0	0	0		0	0	0	0	0	0	0	0	0	0	0	0	0	0	0	0	0	0	0	0	0	0		15	12	10	6
24a PN left	0	0	0	0	0	0	0	0	0	0	0	0	0	0	0	0	0	0	0	0	0		0	1	1	0	0	0	0	0	1	2	0	0	0	0	0	0	1	1	1	0	0	0		12	16	18	3
30a PN left	0	0	0	0	0	0	0	0	0	0	0	0	0	0	0	0	0	0	0	0	0		0	1	0	0	0	0	0	0	0	0	0	0	0	0	0	0	1	0	0	0	0	0		8	7	17	1
33a PN left	0	0	0	0	0	0	0	0	0	0	0	0	0	0	0	0	0	0	0	0	0		0	0	0	0	0	0	0	0	0	0	0	0	0	0	0	0	1	0	0	0	0	0		0	0	0	0
35a PN bilateral left	0	0	0	0	0	0	0	0	0	0	0	0	0	0	0	0	0	0	0	0	0		0	0	0	0	0	1	0	3	0	0	0	0	0	0	0	0	0	0	0	0	0	0		9	6	6	1
35a PN bilateral right	0	0	0	0	0	0	0	0	0	0	0	0	0	0	0	0	0	0	0	0	0		0	0	0	0	0	0	2	0	0	0	1	0	0	0	0	0	0	0	0	0	0	0		2	2	5	2
42a PN left	0	0	0	0	0	0	0	0	0	0	0	0	0	0	0	0	0	0	0	0	0		0	1	0	0	0	0	0	0	0	0	0	0	0	0	0	0	0	0	0	3	0	0		17	20	25	0
42b PN left	0	0	0	0	0	0	0	0	0	0	0	0	0	0	0	0	0	0	0	0	0		1	0	1	0	0	0	0	1	0	0	0	0	0	0	0	0	0	1	1	0	1	1		13	7	12	4
45a PN left	0	0	0	0	0	0	0	0	0	0	0	0	0	0	0	0	0	0	0	0	0		0	0	0	0	0	0	0	0	0	0	0	0	0	0	0	0	0	0	0	0	0	0		7	5	8	3
45b PN left	0	0	0	0	0	0	0	0	0	0	1	0	0	0	0	0	0	0	0	0	0		0	0	0	0	0	0	0	0	0	0	0	0	2	1	0	0	0	0	0	0	0	0		11	10	9	3
47a & 33b PN left	0	0	0	0	0	0	0	0	0	0	0	0	0	0	0	0	0	0	0	0	0		0	0	0	1	1	0	0	0	0	0	0	2	2	0	0	0	0	0	0	0	0	0		5	7	5	1
49a PN left	0	0	0	0	0	2	0	0	0	0	0	0	1	0	0	0	0	0	0	0	0		0	1	0	0	0	0	0	0	0	0	0	1	0	0	2	1	0	1	0	0	0	2		16	3	8	1
59a PN left	0	0	0	0	0	0	0	0	0	0	0	0	0	0	0	0	0	0	0	0	0		0	0	0	1	0	0	0	0	0	0	0	0	0	1	0	0	0	0	0	0	1	0		5	6	5	2
63a PN left	0	0	0	0	0	0	0	0	0	0	0	0	0	0	1	0	0	0	0	0	0		0	0	1	0	0	0	0	0	0	0	0	0	0	0	0	0	0	0	0	0	0	0		14	8	17	1
67b PN left	0	0	0	0	0	0	0	0	0	0	0	0	0	0	0	1	0	0	0	0	0		0	0	0	0	0	1	0	0	0	0	0	0	0	0	0	0	0	0	1	0	0	0		7	12	22	4
74a PN left	0	0	0	0	0	0	0	0	0	0	0	0	0	0	0	0	0	0	0	0	0		0	1	0	0	0	0	0	0	0	0	0	0	0	0	0	0	0	0	0	0	0	0		20	20	19	1
82a PN left	0	0	0	0	0	0	0	0	0	0	0	0	0	0	0	0	0	0	0	0	0		0	1	0	1	0	0	0	0	0	0	0	0	0	0	0	0	0	0	0	0	0	0		0	0	0	0
83a PN left	0	0	0	0	0	0	0	0	0	0	0	0	0	0	0	0	0	0	0	0	0		0	1	0	0	0	0	2	0	0	0	0	0	0	0	2	0	0	0	0	0	1	0		7	5	7	0
85c PN left	0	0	0	0	0	0	0	0	0	0	0	0	0	0	0	0	0	0	1	0	0		0	0	2	0	0	0	0	0	0	0	0	0	0	1	0	1	0	0	0	0	0	0		28	21	21	4
94a & 94b PN left	0	0	0	0	0	0	0	0	0	0	0	0	0	0	0	0	0	0	0	0	0		0	0	0	0	0	0	0	0	0	0	0	0	0	2	0	0	0	0	0	0	0	0		12	10	14	0
Broad T1 left	5	11	8	7	2	2	7	7	8	4	6	8	6	6	6	8	11	6	3	9	6		3	4	10	3	0	2	3	3	9	7	2	11	3	4	3	8	6	8	0	1	8	9		0	63	73	12
Broad T2 left	2	7	9	8	2	1	4	9	9	3	1	6	0	6	6	8	8	5	12	5	5		0	3	8	3	0	3	1	6	13	5	2	1	1	0	1	4	4	4	0	5	4	7		63	0	55	10
Broad T3 left	6	9	4	6	3	4	4	7	8	2	2	7	5	4	3	9	3	4	4	9	7		0	3	1	4	3	1	1	4	12	6	3	4	1	2	0	2	11	4	0	4	5	12		81	88	0	6
Broad D1 left	13	12	6	8	2	0	3	3	8	3	8	8	4	6	11	5	4	3	8	11	5		9	15	14	4	11	6	0	2	11	14	7	15	8	16	8	27	17	11	1	11	22	7		17	7	16	0
Broad D2 left	5	4	2	10	3	0	2	2	1	4	5	3	7	1	3	7	4	1	4	8	4		11	10	5	5	5	5	2	0	5	9	9	10	12	17	14	12	9	10	2	6	11	6		10	1	1	6
Keystone left	0	1	6	2	1	6	12	19	6	9	0	3	0	7	1	0	3	5	6	1	2		0	0	1	0	0	5	3	2	9	4	3	1	0	0	3	1	1	0	1	0	0	2		27	32	16	2
Keystone right	0	5	0	17	0	0	2	20	17	3	0	0	0	0	0	3	5	5	9	0	0		0	0	0	10	1	0	2	1	16	10	1	0	0	0	0	0	0	1	0	3	0	0		17	13	13	1
Picky 0 left [dendrites]	0	0	0	0	0	0	0	0	0	0	0	0	0	0	0	0	0	0	0	0	0		0	0	0	0	0	0	0	0	0	0	0	0	0	0	0	0	0	0	0	0	0	0		0	0	0	0
Picky 0 left [axon]	0	6	4	11	0	0	0	6	0	3	0	0	0	0	0	0	0	5	11	1	1		0	3	4	7	0	0	0	0	22	2	2	0	0	0	0	0	0	3	0	4	0	0		8	16	13	5
Picky 1 left [dendrites]	0	0	0	0	0	0	0	0	0	0	0	0	0	0	0	0	0	1	0	0	0		0	1	1	0	0	1	0	0	0	0	1	0	0	0	0	0	0	1	0	0	0	3		2	2	0	2
Picky 1 left [axon]	0	0	0	0	0	0	0	0	0	0	0	0	0	0	0	0	0	1	0	0	0		0	1	3	3	1	3	0	0	0	0	1	0	0	0	0	0	0	0	1	0	0	1		2	0	0	1
Picky 2 left [dendrites]	0	0	0	0	0	0	0	0	0	0	0	0	0	0	0	0	0	0	0	0	0		0	0	0	0	0	0	1	0	0	0	0	0	0	0	0	0	0	0	0	0	0	0		0	0	0	1
Picky 2 left [axon]	1	0	0	0	0	0	0	0	0	0	0	0	0	0	0	0	0	0	0	0	0		0	1	0	0	0	3	0	0	0	0	0	0	0	1	0	0	0	0	0	0	0	0		2	1	3	0
Picky 3 left [dendrites]	0	0	0	0	0	0	0	0	0	0	0	0	0	0	0	0	0	0	0	0	0		0	0	0	0	0	0	0	0	0	0	0	0	0	0	0	0	0	0	0	0	0	0		2	0	0	0
Picky 3 left [axon]	0	0	0	0	1	0	0	0	0	0	0	0	0	0	0	0	0	0	0	0	0		0	0	0	0	0	0	0	0	0	0	0	0	0	0	0	0	9	0	0	0	0	1		0	0	0	1
Picky 4 left [dendrites]	0	0	0	1	0	0	0	0	1	0	0	0	0	0	0	0	0	0	0	0	0		1	0	0	2	0	0	0	5	1	1	0	0	0	0	0	0	0	0	0	0	0	0		0	1	1	0
Picky 4 left [axon]	0	0	0	0	0	0	0	0	0	1	0	0	1	0	0	0	0	0	0	0	0		0	0	0	0	1	2	0	0	0	0	5	5	0	1	1	0	0	0	2	2	0	1		0	0	1	2
Choosy 1 left [dendrites]	0	0	0	0	0	0	0	0	0	0	0	0	0	0	0	0	0	0	0	0	0		0	0	0	0	0	0	0	0	0	0	0	0	0	0	0	0	0	0	0	0	0	0		0	0	0	0
Choosy 1 left [axon]	0	0	0	1	0	0	0	0	0	0	0	0	0	0	0	0	0	0	0	0	1		1	2	6	2	1	0	2	1	5	2	2	0	0	8	1	4	1	2	1	3	5	11		2	0	3	3
Choosy 2 left [dendrites]	0	0	0	0	0	0	0	0	0	0	0	0	0	0	0	0	0	0	0	0	0		0	0	0	0	0	0	0	0	0	0	0	1	0	0	0	0	0	0	0	0	0	1		0	0	0	0
Choosy 2 left [axon]	0	0	0	0	0	0	0	0	0	0	0	0	0	0	0	0	0	1	1	0	0		0	4	0	3	4	0	6	3	5	0	1	0	0	3	1	2	1	7	1	3	2	7		0	0	2	1
Ventral LN left	0	0	0	0	0	0	0	0	0	0	0	0	0	0	0	1	0	0	0	0	0		1	3	0	9	0	0	1	0	2	5	0	0	0	0	0	0	0	11	0	0	0	0		11	10	9	1
mPN iACT A1 left	0	0	0	0	0	0	0	0	0	0	0	0	0	0	0	0	0	0	0	0	1		0	0	0	0	0	1	0	0	0	0	0	0	0	0	0	0	2	0	0	0	0	0		0	0	0	0
mPN iACT A2 left	0	0	0	0	0	0	0	0	0	0	0	0	0	0	0	0	0	0	0	0	0		0	0	0	0	0	0	0	0	0	0	0	0	0	0	0	0	0	0	0	0	0	0		0	0	0	0
mPN iACT A3 left	0	0	0	0	0	0	0	0	0	0	0	0	0	0	0	0	0	0	0	0	0		0	0	0	0	0	0	0	0	0	0	0	0	0	0	0	0	0	0	0	0	0	0		0	0	0	0
mPN iACT B1 left	0	0	0	0	0	0	0	0	0	0	0	0	0	0	0	0	0	0	0	0	0		0	0	0	0	0	0	0	0	0	0	0	0	0	0	0	0	0	0	0	0	0	0		0	0	0	0
mPN iACT B2 left	0	0	0	0	0	0	0	0	0	0	0	0	0	0	0	0	0	0	0	0	0		0	0	0	0	0	0	0	0	0	0	0	0	0	0	0	0	0	0	0	0	0	0		0	0	0	0
mPN iACT B3 left	0	0	0	0	0	0	0	0	0	0	0	0	0	0	0	0	0	0	0	0	0		0	0	0	0	1	0	1	0	0	0	0	0	0	0	0	0	0	0	0	0	0	0		0	0	1	1
mPN iACT C1 left	0	0	0	0	0	0	0	0	0	0	0	0	0	0	0	0	0	0	0	0	0		0	0	0	0	0	0	0	0	0	0	0	0	0	0	0	0	0	0	0	0	0	0		0	0	0	0
mPN iACT C2 left	0	0	0	0	0	0	0	0	0	0	0	0	0	0	0	0	0	0	0	0	0		0	0	0	0	0	0	1	0	1	0	0	0	0	0	0	0	0	0	0	0	0	0		0	0	0	0
mPN iACT bilateral LOWER left	0	0	0	0	0	0	0	0	0	0	0	0	0	0	0	0	0	0	0	0	0		0	0	0	0	0	0	0	0	0	0	0	0	0	0	0	0	0	0	0	0	0	0		0	0	0	0
mPN iACT bilateral LOWER right	0	0	0	0	0	0	0	0	0	0	0	0	0	0	0	0	0	0	0	0	0		0	0	0	0	0	0	0	0	0	0	0	0	0	0	0	0	0	0	0	0	0	0		0	0	0	0
mPN iACT bilateral UPPER left	0	0	0	0	0	0	0	0	0	0	0	0	0	0	0	0	0	0	0	0	0		2	0	0	0	0	0	0	0	0	0	0	1	0	1	0	0	0	0	0	0	0	1		4	0	2	0
mPN iACT bilateral UPPER right	0	0	0	0	0	1	0	0	0	0	0	0	0	0	0	0	0	0	0	0	0		0	0	0	0	0	0	2	0	1	0	0	0	0	0	0	0	0	0	0	0	0	1		5	4	4	0
mPN iACT VUM left	0	0	0	0	0	0	0	0	0	0	0	0	0	0	0	0	0	0	0	0	0		0	0	0	0	0	0	0	0	0	0	0	0	0	0	0	0	0	0	0	0	0	0		1	0	0	0
mPN iACT VUM right	0	0	0	0	0	0	0	0	0	0	0	0	0	0	0	0	0	0	0	0	0		0	0	0	0	0	0	0	0	0	0	0	0	0	0	0	0	0	0	0	0	0	0		0	0	0	0
mPN D left	0	0	0	0	0	0	0	0	0	0	0	0	0	0	0	0	0	0	0	0	0		0	0	0	0	0	0	0	0	0	0	0	0	0	0	0	0	0	0	0	0	0	0		0	0	0	0
mPN D right	0	0	0	0	0	0	0	0	0	0	0	0	0	0	0	0	0	0	0	0	0		0	0	0	0	0	0	0	0	0	0	0	0	0	0	0	0	0	0	0	0	0	0		0	0	0	0
mPN cobra left	0	0	0	0	0	0	0	0	0	0	0	0	0	0	0	0	0	0	0	0	0		0	0	0	0	0	0	0	0	0	0	0	0	0	0	0	0	0	0	0	0	0	0		0	0	0	0
mPN seahorse left	0	0	0	0	0	0	0	0	0	0	0	0	0	0	0	0	0	0	0	0	1		0	0	0	0	0	0	1	0	0	0	0	0	0	0	0	0	0	1	0	0	0	2		1	2	1	0
SEZ vine left	0	0	0	0	0	0	0	0	0	0	0	0	0	0	0	0	0	0	0	0	0		0	0	0	0	0	0	0	2	0	0	0	0	0	0	0	0	0	0	0	0	0	0		7	4	3	0
SEZ cypress left	0	0	0	0	0	0	0	0	0	0	0	0	0	0	0	0	0	0	0	0	0		0	0	0	0	0	0	0	0	0	0	0	0	0	0	0	0	0	0	0	0	0	0		1	0	0	0
SEZ clamp left	0	0	0	0	0	0	0	0	0	0	0	0	0	0	0	0	0	0	0	0	0		0	0	0	0	0	0	0	0	0	0	0	0	0	0	0	0	0	0	0	0	0	0		0	0	0	0
SEZ spruce left	0	0	0	0	0	0	0	0	0	0	0	0	0	0	0	0	0	0	0	0	0		0	0	0	0	0	0	0	0	0	0	0	0	0	0	0	0	0	0	0	0	0	0		0	0	0	0
SEZ ginkgo 1 left	0	0	0	0	0	0	0	0	0	0	0	0	0	0	0	0	0	0	0	0	0		0	0	0	0	0	0	0	0	0	0	0	0	0	0	0	0	0	0	0	0	0	0		1	0	0	0
SEZ ginkgo 2 left	0	0	0	0	0	0	0	0	0	0	0	0	0	0	0	0	0	0	0	0	0		0	0	0	0	0	0	0	0	0	0	0	0	0	0	0	0	0	0	0	0	0	0		0	0	0	0
Descending Olfactory PN left	0	0	0	0	0	0	0	0	0	1	0	0	0	0	0	0	0	0	0	0	0		0	0	0	0	0	3	0	0	0	0	0	0	0	0	0	0	0	0	1	0	0	1		1	0	0	1
CSD left	0	0	0	0	0	0	0	0	0	0	0	0	0	0	0	0	0	0	0	0	0		0	0	0	0	0	0	0	0	0	0	0	0	0	0	0	0	0	0	0	0	0	0		0	0	0	0
CSD right	0	0	0	0	0	0	0	0	0	0	0	0	0	0	0	1	1	0	0	0	0		0	0	0	0	3	2	0	1	1	1	0	0	1	0	0	0	1	1	1	0	0	0		4	3	4	5
lAL-1 (octopaminergic) left	3	0	0	0	0	0	0	0	1	0	0	0	0	0	0	0	0	0	0	0	0		2	1	0	0	0	0	2	1	1	1	0	0	0	0	0	0	2	4	0	3	0	0		18	12	7	1
lAL-1 (octopaminergic) right	3	0	0	0	0	0	0	0	0	0	0	0	0	0	0	0	1	0	0	0	0		1	0	0	0	0	1	1	2	0	0	0	0	0	1	0	0	6	0	0	0	0	0		5	2	4	4
tdc (octopaminergic) ant.	0	0	0	0	0	0	0	0	0	0	0	0	0	0	0	0	0	0	0	0	0		0	0	0	0	0	0	1	1	0	1	0	0	0	2	0	0	0	1	0	0	0	1		14	13	10	0
tdc (octopaminergic) post.	0	0	0	0	0	0	0	0	0	0	0	0	0	0	0	0	0	0	0	0	0		1	0	0	0	0	0	1	0	0	0	0	1	1	0	0	1	2	0	0	1	0	0		4	5	4	0
DENDRITIC ARBOR TOTAL	38	56	39	71	14	16	34	73	59	34	23	35	24	30	32	43	40	37	59	44	33		77	123	138	129	100	154	212	205	240	165	114	166	123	141	110	152	182	183	32	162	149	158		1123	943	975	404
[truncated: 49 more columns]
