# Supplementary material for: The wiring diagram of a glomerular olfactory system
Source: eLife. 2016 May 13;5:e14859. doi: 10.7554/eLife.14859 (PMC4930330; doi:10.7554/eLife.14859)
Supplement: Supplementary file 2. — DOI: http://dx.doi.org/10.7554/eLife.14859.020 [file elife-14859-supp2.xlsx]

## Sheet: RIGHT CONNECTIVITY FOR 1ST SUBM
	1a ORN right	13a ORN right	22c ORN right	24a ORN right	30a ORN right	33a ORN right	35a ORN right	42a ORN right	42b ORN right	45a ORN right	45b ORN right	47a & 33b ORN right	49a ORN right	59a ORN right	63a ORN right	67b ORN right	74a ORN right	82a ORN right	83a ORN right	85c ORN right	94a & 94b ORN right		1a PN right	13a PN right	22c PN right	24a PN right	30a PN right	33a PN right	35a PN bilateral left	35a PN bilateral right	42a PN right	42b PN right	45a PN right	45b PN right	47a & 33b PN right	49a PN right	59a PN right	63a PN right	67b PN right	74a PN right	82a PN right	83a PN right	85c PN right	94a & 94b PN right		Broad T1 right	Broad T2 right	Broad T3 right	Broad D1 right
1a ORN right	0	0	0	0	0	0	0	0	0	0	0	0	0	0	0	0	0	0	0	0	0		41	0	0	0	0	0	0	0	0	2	0	0	0	2	0	0	0	0	0	1	0	0		3	11	10	12
13a ORN right	0	0	0	0	0	0	0	0	0	0	0	0	0	0	0	0	0	0	0	0	0		0	101	0	7	1	0	0	0	0	0	0	0	0	0	0	0	0	0	6	0	0	1		31	40	34	16
22c ORN right	0	0	0	0	0	0	0	0	0	0	0	0	0	0	0	0	0	0	0	0	0		0	0	62	0	0	4	0	0	0	0	0	0	3	0	0	1	0	0	0	0	0	0		29	36	55	20
24a ORN right	0	1	0	0	0	0	0	1	0	0	0	0	0	0	0	0	0	0	0	0	0		0	0	1	62	0	0	0	0	1	0	0	0	0	0	0	0	0	0	0	0	0	0		25	30	8	23
30a ORN right	0	0	0	0	0	0	0	0	0	0	0	0	0	0	0	0	0	0	0	0	1		2	0	0	0	90	0	0	0	0	0	0	0	0	0	0	0	1	0	0	0	0	0		26	6	2	7
33a ORN right	0	0	0	0	0	0	0	0	0	0	0	0	0	0	0	0	0	0	0	0	0		0	0	0	0	0	100	0	0	0	0	1	4	1	0	0	1	0	0	0	0	0	0		19	12	12	3
35a ORN right	0	0	0	0	0	0	0	0	0	0	0	0	0	0	0	0	0	0	0	0	0		1	0	0	0	0	0	36	53	0	0	0	0	0	0	0	0	0	5	0	0	0	0		25	31	38	16
42a ORN right	0	0	0	0	0	0	0	0	0	0	0	0	0	0	0	0	0	0	0	0	0		0	0	0	0	0	0	0	0	120	5	0	0	0	0	0	0	0	0	0	2	0	0		19	41	25	23
42b ORN right	0	0	0	0	0	0	0	0	0	0	0	0	0	0	0	0	0	0	0	0	0		0	0	0	0	0	0	0	0	1	96	0	0	0	0	0	0	0	4	0	0	0	0		4	39	41	18
45a ORN right	0	0	0	0	0	0	0	0	0	0	0	0	0	0	0	0	0	0	0	0	0		0	0	0	0	0	5	0	0	0	0	80	0	0	0	0	0	0	0	4	0	0	0		23	25	17	4
45b ORN right	0	0	0	0	0	0	0	0	0	0	0	0	0	0	0	0	0	0	0	0	0		0	0	0	0	0	1	0	0	0	0	1	71	0	1	0	2	0	0	0	0	0	4		33	16	12	15
47a & 33b ORN right	0	0	0	0	0	0	0	0	0	0	0	0	0	0	0	0	0	0	0	0	0		0	0	0	0	0	1	0	0	0	0	0	24	84	0	0	0	0	0	0	0	0	0		27	12	28	10
49a ORN right	0	0	0	0	0	0	0	0	0	0	0	0	0	0	0	0	0	0	0	0	0		0	0	0	0	0	0	0	0	0	0	0	0	0	80	1	2	0	0	3	0	0	4		28	19	10	13
59a ORN right	0	0	0	0	0	0	0	0	0	0	0	0	0	0	0	0	0	0	0	0	0		0	0	0	0	0	1	0	0	0	0	0	0	0	0	77	3	0	0	0	1	0	0		22	24	18	16
63a ORN right	0	0	0	0	0	0	0	0	0	0	0	0	0	0	0	0	0	0	0	0	0		0	0	0	0	0	2	0	0	0	0	0	4	5	0	0	79	0	0	0	0	0	0		25	37	29	21
67b ORN right	0	0	0	0	0	0	0	0	0	0	0	0	0	0	0	0	0	0	0	0	0		0	0	0	0	0	0	0	0	0	0	0	0	0	0	0	0	104	0	0	0	0	0		43	21	11	26
74a ORN right	0	0	0	0	0	0	0	0	0	0	0	0	0	0	0	0	0	0	0	0	0		2	0	0	0	0	0	1	2	1	10	0	0	0	0	0	0	0	99	0	0	0	0		21	34	26	24
82a ORN right	0	1	0	0	0	0	0	0	0	1	0	0	0	0	0	0	0	0	0	0	0		0	0	7	3	0	0	0	0	0	0	4	0	0	0	0	0	0	0	24	0	0	2		11	19	18	13
83a ORN right	0	0	0	0	0	0	0	0	0	0	0	0	0	0	0	0	0	0	0	0	0		0	0	0	0	0	0	0	0	3	0	0	0	0	2	1	0	0	0	0	111	11	0		12	20	18	8
85c ORN right	0	0	0	0	0	0	0	0	0	0	0	0	0	0	0	0	0	0	0	0	0		0	0	0	0	0	0	0	0	0	0	4	2	7	0	0	0	0	0	0	0	64	0		28	29	41	15
94a & 94b ORN right	0	0	0	0	0	0	0	0	0	0	0	0	0	0	0	0	0	0	0	0	0		0	0	0	0	0	0	0	0	0	0	0	0	0	0	0	0	0	0	4	0	0	76		25	12	23	7
1a PN right	0	0	0	0	0	0	0	0	0	0	0	0	0	0	0	0	0	0	0	0	0		0	0	1	1	0	0	0	0	0	1	0	0	0	0	0	0	2	0	0	0	0	0		0	3	3	0
13a PN right	0	0	0	0	0	0	0	0	0	0	0	0	0	0	0	0	0	0	0	0	0		0	0	0	0	0	0	0	1	0	0	0	0	0	0	1	0	0	0	0	0	0	0		12	18	12	0
22c PN right	0	0	0	0	0	0	0	0	0	0	0	0	0	0	0	0	0	0	0	0	0		0	0	0	0	0	0	0	0	0	0	0	0	0	0	0	0	2	0	0	0	0	0		12	11	13	6
24a PN right	0	0	0	0	0	0	0	0	0	0	0	0	0	0	0	0	0	0	0	0	0		1	2	0	1	0	0	0	0	0	1	0	0	0	0	0	0	0	0	0	1	0	1		26	24	24	1
30a PN right	0	0	0	0	0	0	0	0	0	0	0	0	0	0	0	0	0	0	0	0	0		0	0	0	0	0	0	0	0	0	0	0	0	0	0	0	0	1	1	0	0	0	0		18	7	7	5
33a PN right	0	0	0	0	0	0	0	0	0	0	0	0	0	0	0	0	0	0	0	0	0		0	0	0	0	1	0	0	0	0	0	0	1	4	0	0	0	0	0	0	1	0	0		0	0	0	0
35a PN bilateral left	0	0	0	0	0	0	0	0	0	0	0	0	0	0	0	0	0	0	0	0	0		1	0	0	0	0	0	0	3	0	0	0	0	0	1	0	0	0	0	0	0	0	0		3	3	3	0
35a PN bilateral right	0	0	0	0	0	0	0	0	0	0	0	0	0	0	0	0	0	0	0	0	0		0	0	0	0	0	0	2	0	0	0	0	0	0	0	0	0	0	0	0	1	0	0		2	2	7	2
42a PN right	0	0	0	0	0	0	0	0	0	0	0	0	0	0	0	0	0	0	0	0	0		0	0	0	0	0	0	0	0	0	0	0	0	0	0	0	0	0	0	0	0	0	0		14	15	12	4
42b PN right	0	0	0	0	0	0	0	0	0	0	0	0	0	0	0	0	0	0	0	0	0		0	0	0	1	0	0	0	0	3	0	0	0	0	0	0	2	0	0	0	0	0	1		5	15	18	0
45a PN right	0	0	0	0	0	0	0	0	0	0	0	0	0	0	0	0	0	0	0	0	0		0	1	0	0	0	1	0	0	0	0	0	0	0	0	0	0	0	0	1	0	0	0		5	6	5	0
45b PN right	0	0	0	0	0	0	0	0	0	0	1	0	0	0	0	0	0	0	0	0	0		0	0	0	0	0	2	0	0	0	0	0	0	1	0	0	0	0	0	0	0	0	1		14	10	15	2
47a & 33b PN right	0	0	0	0	0	0	0	0	0	0	0	0	0	0	0	0	0	0	0	0	0		0	0	0	1	0	0	0	0	0	0	0	1	0	0	0	0	1	0	0	0	0	0		9	6	11	3
49a PN right	0	0	0	0	0	0	0	0	0	0	0	0	0	0	0	0	0	0	0	0	0		0	0	0	1	0	1	0	0	1	0	0	0	0	1	0	0	0	0	0	0	0	2		14	16	13	4
59a PN right	0	0	0	0	0	0	0	0	0	0	0	0	0	0	0	0	0	0	0	0	0		0	0	0	0	0	0	0	0	0	0	0	0	0	0	0	0	1	0	0	1	0	0		7	5	9	1
63a PN right	0	0	0	0	0	0	0	0	0	0	0	0	0	0	1	0	0	0	0	0	0		0	0	0	0	0	1	1	0	0	0	1	1	0	0	0	0	0	0	0	0	0	0		12	8	13	8
67b PN right	0	0	0	0	0	0	0	0	0	0	0	0	0	0	0	0	0	0	0	0	0		1	1	2	1	2	0	0	0	0	0	0	0	0	0	0	0	1	0	0	0	0	0		22	10	12	6
74a PN right	0	0	0	0	0	0	0	0	0	0	0	0	0	0	0	0	0	0	0	0	0		0	0	0	0	0	0	0	2	0	0	0	0	0	0	0	0	0	0	0	0	0	0		12	22	25	8
82a PN right	0	0	0	0	0	0	0	0	0	0	0	0	0	0	0	0	0	0	0	0	0		0	0	0	0	0	0	0	0	0	1	0	0	0	0	0	0	0	0	0	0	0	0		0	0	0	0
83a PN right	0	0	0	0	0	0	0	0	0	0	0	0	0	0	0	0	0	0	0	0	0		0	0	0	0	0	0	1	0	1	0	0	0	0	0	0	0	0	0	0	0	0	0		5	9	10	0
85c PN right	0	0	0	1	0	0	0	0	0	0	0	0	0	0	0	0	0	0	0	0	0		0	0	0	0	0	1	0	0	1	0	0	0	0	0	0	2	1	0	0	0	0	1		20	25	30	2
94a & 94b PN right	0	0	0	0	0	0	0	0	0	0	0	0	0	0	0	0	0	0	0	0	0		0	0	0	0	0	0	0	0	0	0	0	0	0	1	0	0	0	0	0	0	0	0		11	6	10	0
Broad T1 right	3	11	8	11	8	5	3	5	1	7	10	8	8	6	10	14	10	7	8	11	13		1	5	4	4	4	3	2	3	3	0	1	8	2	5	4	5	11	3	0	5	1	9		0	76	63	10
Broad T2 right	6	13	7	8	5	2	4	9	10	4	6	2	1	7	8	7	10	11	11	8	8		0	2	1	4	0	5	1	2	3	1	1	6	0	4	2	4	3	4	0	6	3	3		64	0	94	8
Broad T3 right	9	12	9	8	1	1	6	7	12	7	5	10	9	5	8	3	12	5	11	8	14		1	3	8	6	0	1	2	3	5	10	1	4	3	4	3	5	5	6	1	2	5	9		64	108	0	8
Broad D1 right	8	9	5	13	3	1	3	9	3	6	12	2	6	8	5	10	12	3	9	8	7		9	15	10	15	17	5	2	1	11	20	12	20	7	34	14	21	23	15	4	12	20	16		12	10	8	0
Broad D2 right	7	13	12	6	3	0	2	6	7	4	8	7	11	4	16	11	8	3	10	10	1		9	12	15	8	3	9	0	1	11	10	11	12	21	25	7	28	12	8	5	11	17	7		15	10	13	16
Keystone left	0	0	1	2	3	0	9	13	8	5	0	0	0	7	1	2	4	5	1	2	7		0	0	0	1	2	1	3	2	12	10	0	0	0	0	3	0	1	0	0	0	0	2		13	27	21	0
Keystone right	2	8	4	15	0	0	10	19	11	7	0	3	0	0	4	0	7	2	7	6	1		0	0	0	5	0	0	2	1	11	12	1	0	1	0	0	1	0	1	0	4	1	0		18	38	43	2
Picky 0 right [dendrites]	0	0	0	0	0	0	0	1	0	0	0	0	0	0	0	0	0	0	0	0	0		0	0	0	0	0	0	0	0	0	0	0	0	0	0	0	0	0	0	0	0	0	0		1	0	0	0
Picky 0 right [axon]	0	7	1	7	0	0	0	1	0	5	0	0	0	0	0	0	1	13	10	0	3		0	6	3	6	1	0	0	1	17	10	3	0	0	0	0	0	3	0	0	1	0	1		4	7	14	5
Picky 1 right [dendrites]	0	0	0	0	0	0	0	0	0	0	0	0	0	0	0	0	0	0	0	1	0		0	2	0	0	0	0	0	0	2	0	1	0	0	0	0	0	0	0	0	2	1	0		2	2	1	1
Picky 1 right [axon]	0	0	0	0	0	0	0	0	0	0	0	0	0	0	0	0	0	1	0	0	0		0	0	1	0	0	0	0	0	0	0	0	0	0	0	0	0	0	0	0	0	1	1		2	1	0	0
Picky 2 right [dendrites]	0	0	0	0	0	0	0	0	0	0	1	0	0	0	0	0	0	0	0	0	0		0	0	0	0	0	1	0	0	0	0	0	0	0	0	0	0	0	0	0	0	0	0		0	0	0	0
Picky 2 right [axon]	0	0	0	0	0	0	0	0	0	0	0	0	0	0	0	0	0	0	0	0	0		0	0	0	0	0	0	0	0	1	0	1	0	0	1	1	0	0	0	0	0	0	0		0	0	0	2
Picky 3 right [dendrites]	0	0	0	0	0	0	0	0	0	0	0	0	0	0	0	0	0	0	0	0	0		0	0	0	0	0	0	1	0	0	0	0	0	0	0	0	0	0	0	0	0	0	0		0	0	0	0
Picky 3 right [axon]	0	0	0	0	0	0	0	0	0	0	0	0	0	0	0	0	0	0	0	0	0		0	0	0	0	0	0	0	0	0	0	0	0	0	0	0	0	18	0	0	0	0	2		2	5	2	1
Picky 4 right [dendrites]	0	0	0	0	1	0	0	0	0	1	0	0	0	0	0	0	0	0	0	0	0		0	0	0	0	1	0	3	9	0	2	3	0	0	0	0	0	0	0	0	0	0	0		0	3	4	2
Picky 4 right [axon]	0	0	0	0	0	0	0	0	0	1	0	0	0	0	0	0	0	0	0	0	0		0	0	0	0	0	0	0	0	0	0	3	0	0	0	0	1	1	0	3	2	0	4		1	2	3	2
Choosy 1 right [dendrites]	0	0	0	0	0	0	0	0	0	0	0	0	0	0	0	0	0	0	0	0	0		0	0	0	0	0	0	0	0	0	0	0	1	0	0	0	1	0	0	0	0	0	0		0	0	1	0
Choosy 1 right [axon]	0	0	0	0	0	0	0	0	0	1	0	0	0	0	0	0	0	0	0	0	0		0	6	3	1	2	0	6	8	9	1	0	0	1	6	1	3	0	4	3	14	5	8		0	0	1	4
Choosy 2 right [dendrites]	0	0	0	0	0	0	0	0	0	0	0	0	0	0	0	0	0	0	0	0	0		0	0	0	0	0	0	0	0	0	0	0	0	0	0	0	0	0	0	0	0	0	0		0	0	0	0
Choosy 2 right [axon]	0	1	0	0	0	0	0	0	0	0	1	0	0	0	0	0	0	3	0	0	1		4	9	5	2	3	0	3	4	8	2	7	3	4	4	3	1	0	0	11	4	7	12		0	0	2	6
Ventral LN right	0	1	0	1	0	0	1	1	1	0	0	0	0	0	0	0	0	0	0	0	0		0	6	4	3	0	0	1	0	4	2	0	0	0	0	0	0	0	6	0	0	0	0		8	11	10	10
mPN iACT A1 right	0	0	0	0	0	0	0	0	0	0	0	0	0	0	0	0	0	0	0	0	0		0	0	0	0	0	0	0	0	0	0	0	0	0	0	0	0	0	0	0	0	0	0		1	0	1	0
mPN iACT A2 right	0	0	0	0	0	0	0	0	0	0	0	0	0	0	0	0	0	0	0	0	0		0	0	0	0	0	0	0	0	0	0	0	0	0	0	0	1	0	0	0	0	0	0		0	0	0	0
mPN iACT A3 right	0	0	0	0	0	0	0	0	0	0	0	0	0	0	0	0	0	0	0	0	0		0	0	0	0	0	0	0	0	0	0	0	0	0	0	0	0	0	0	0	0	0	0		0	0	0	0
mPN iACT B1 right	0	0	0	0	0	0	0	0	0	0	0	0	0	0	0	0	0	0	0	0	0		0	0	0	0	0	0	0	0	0	0	0	0	0	0	0	0	0	0	0	0	0	0		0	0	0	0
mPN iACT B2 right	0	0	0	0	0	0	0	0	0	0	0	0	0	0	0	0	0	0	0	0	0		0	0	0	0	0	0	0	0	0	0	0	0	0	0	0	0	0	0	0	0	0	0		0	0	0	0
mPN iACT B3 right	0	1	0	0	0	0	0	0	0	0	0	0	0	0	0	0	0	0	0	0	0		0	1	0	0	0	0	0	0	0	0	0	0	0	0	0	0	0	1	0	0	0	0		0	0	1	0
mPN iACT C1 right	0	0	0	0	0	0	0	0	0	0	0	0	0	0	0	0	0	0	0	0	0		0	0	0	0	0	0	0	0	0	0	0	0	0	0	0	0	0	0	0	0	0	0		0	0	0	0
mPN iACT C2 right	0	0	0	0	0	0	0	0	0	0	0	0	0	0	0	0	0	0	0	0	0		0	0	0	0	0	0	0	0	0	0	0	0	0	0	0	0	0	0	0	0	0	0		0	0	0	0
mPN iACT bilateral LOWER left	0	0	0	0	0	0	0	0	0	0	0	0	0	0	0	0	0	0	0	0	0		0	0	0	0	0	0	0	0	0	0	0	0	0	0	0	0	0	0	0	0	0	0		0	0	0	0
mPN iACT bilateral LOWER right	0	0	0	0	0	0	0	0	0	0	0	0	0	0	0	0	0	0	0	0	0		0	0	0	0	0	0	0	0	0	0	0	0	0	0	0	0	0	0	0	0	0	0		0	0	0	0
mPN iACT bilateral UPPER left	0	0	0	0	0	0	0	0	0	0	0	0	0	0	0	0	0	0	0	0	0		0	0	0	0	0	1	0	0	0	0	0	0	0	3	0	0	0	0	0	0	1	1		9	8	2	2
mPN iACT bilateral UPPER right	0	0	0	0	0	0	0	0	0	0	0	0	0	0	0	0	0	0	0	0	0		1	0	0	2	0	1	2	0	0	0	0	0	0	0	0	0	0	1	0	0	0	1		6	7	8	2
mPN iACT VUM left	0	0	0	0	0	0	0	0	0	0	0	0	0	0	0	0	0	0	0	0	0		1	0	0	0	0	0	0	0	0	0	0	0	0	0	0	0	0	0	0	0	0	0		0	0	0	0
mPN iACT VUM right	0	0	0	0	0	0	0	0	0	0	0	0	0	0	0	0	0	0	0	0	0		0	0	0	0	0	0	0	0	0	0	0	0	0	0	0	0	0	0	0	0	0	0		0	0	0	0
mPN D left	0	0	0	0	0	0	0	0	0	0	0	0	0	0	0	0	0	0	0	0	0		0	0	0	0	0	0	0	0	0	0	0	0	0	0	0	0	0	1	0	0	0	0		0	0	0	0
mPN D right	0	0	0	0	0	0	0	0	0	0	0	0	0	0	0	0	0	0	0	0	0		0	0	0	0	0	1	0	0	0	0	0	0	0	0	0	0	0	0	0	0	0	0		0	0	0	0
mPN cobra right	0	0	0	0	0	0	0	0	0	0	0	0	0	0	0	0	0	0	0	0	0		0	0	0	0	0	0	0	0	0	0	0	0	0	0	0	0	0	0	0	0	0	0		0	1	0	0
mPN seahorse right	0	0	0	0	0	0	0	0	0	0	0	0	0	0	0	0	0	0	0	0	0		0	0	0	0	0	0	0	0	0	0	0	0	0	0	0	0	0	0	0	0	0	1		0	0	1	0
SEZ vine right	0	0	0	0	0	0	0	0	0	0	0	0	0	0	0	0	0	0	0	0	0		0	0	0	0	0	0	0	1	0	0	0	0	0	0	0	0	0	0	0	0	0	0		5	7	7	1
SEZ cypress right	0	0	0	0	0	0	0	0	0	0	0	0	0	0	0	0	0	0	0	0	0		0	0	0	0	0	0	0	0	0	0	0	0	0	0	0	0	0	0	0	0	0	0		0	0	0	0
SEZ clamp right	0	0	0	0	0	0	0	0	0	0	0	0	0	0	0	0	0	0	0	0	0		0	0	0	0	0	0	1	0	0	0	0	0	0	0	0	0	0	0	0	0	0	0		0	0	0	0
SEZ spruce right	0	0	0	0	0	0	0	0	0	0	0	0	0	0	0	0	0	0	0	0	0		0	0	0	0	0	0	0	0	0	0	0	0	0	0	0	0	0	0	0	0	0	0		0	0	0	0
SEZ ginkgo 1 right	0	0	0	0	0	0	0	0	0	0	0	0	0	0	0	0	0	0	0	0	0		0	0	0	0	0	0	0	0	0	0	0	0	0	0	0	0	0	0	0	0	0	0		0	0	0	0
SEZ ginkgo 2 right	0	0	0	0	0	0	0	0	0	0	0	0	0	0	0	0	0	0	0	0	0		1	0	0	0	0	0	0	0	0	0	0	0	0	0	0	0	0	0	1	0	0	0		1	0	0	0
Descending Olfactory PN right	0	0	0	0	0	0	0	0	0	0	1	0	0	0	0	0	0	0	0	0	0		0	0	0	0	1	5	0	0	0	0	0	0	0	0	0	1	0	0	0	0	0	0		2	3	0	2
CSD left	0	1	0	0	0	0	0	0	0	1	0	0	0	0	0	0	1	0	0	0	0		0	0	1	0	0	2	0	0	0	1	0	0	0	0	0	0	5	0	0	0	0	0		3	2	1	2
CSD right	0	0	0	0	0	0	0	0	0	0	0	0	0	0	0	0	0	0	0	0	0		0	0	0	0	0	0	0	1	0	0	0	0	0	0	0	0	0	0	0	0	0	0		0	0	0	0
lAL-1 (octopaminergic) left	1	0	0	0	0	0	0	0	0	0	0	0	0	0	0	0	0	0	0	0	0		0	0	0	0	0	0	2	1	2	1	0	0	0	0	0	0	1	0	0	0	0	0		5	6	4	0
lAL-1 (octopaminergic) right	2	0	0	0	0	0	0	1	0	0	0	0	0	0	0	1	2	0	0	0	0		0	1	1	0	0	0	1	2	2	0	0	0	0	0	0	0	1	1	0	0	0	0		12	12	14	6
tdc (octopaminergic) ant.	1	0	0	0	0	0	1	0	0	0	1	0	0	0	0	0	0	0	0	0	0		0	0	0	0	1	1	1	1	0	0	1	1	0	1	1	0	0	2	0	0	0	0		4	12	9	1
tdc (octopaminergic) post.	0	0	0	0	0	0	0	0	0	0	0	0	0	0	0	0	0	0	0	0	0		1	0	0	0	1	0	1	0	0	1	0	1	0	0	0	0	6	0	1	0	0	0		7	12	13	0
DENDRITIC ARBOR TOTAL	39	79	47	72	24	9	39	73	53	50	46	32	35	37	53	48	67	53	67	54	56		74	171	128	129	130	152	212	205	239	198	137	163	140	175	120	161	197	159	70	179	137	168		1044	1197	1123	478
[truncated: 49 more columns]
