# Supplementary figures and images for: The wiring diagram of a glomerular olfactory system
Source: eLife journal article supplement (doi:10.7554/elife.14859), 2016-05-13

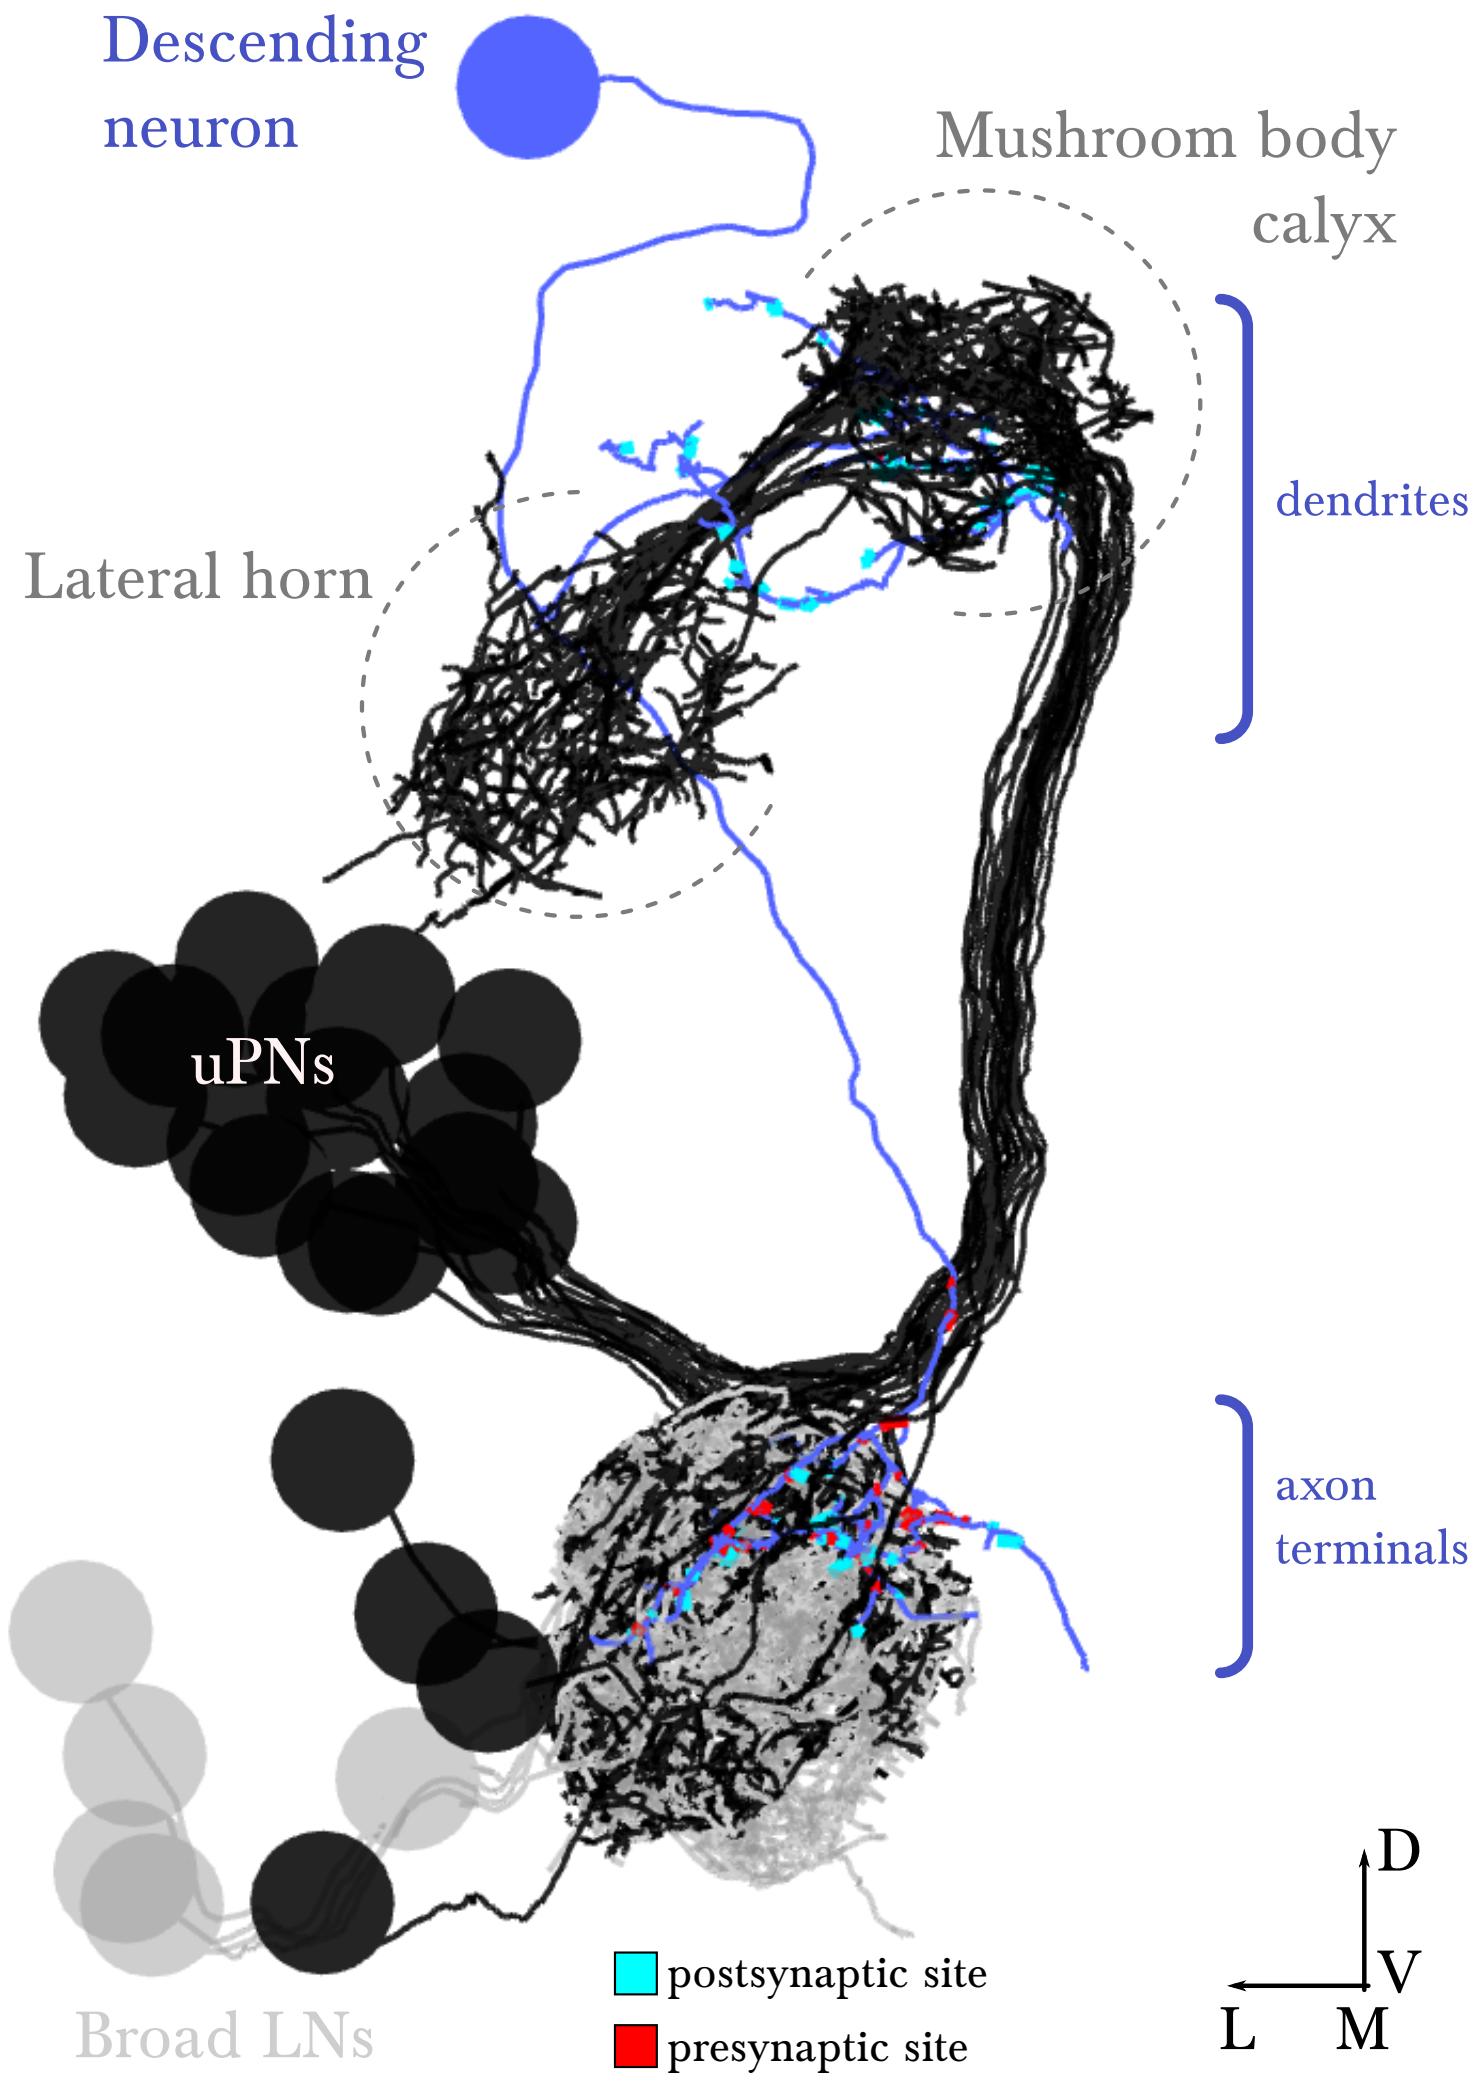

Supplement: supp [file elife-14859-supp-v1.zip]

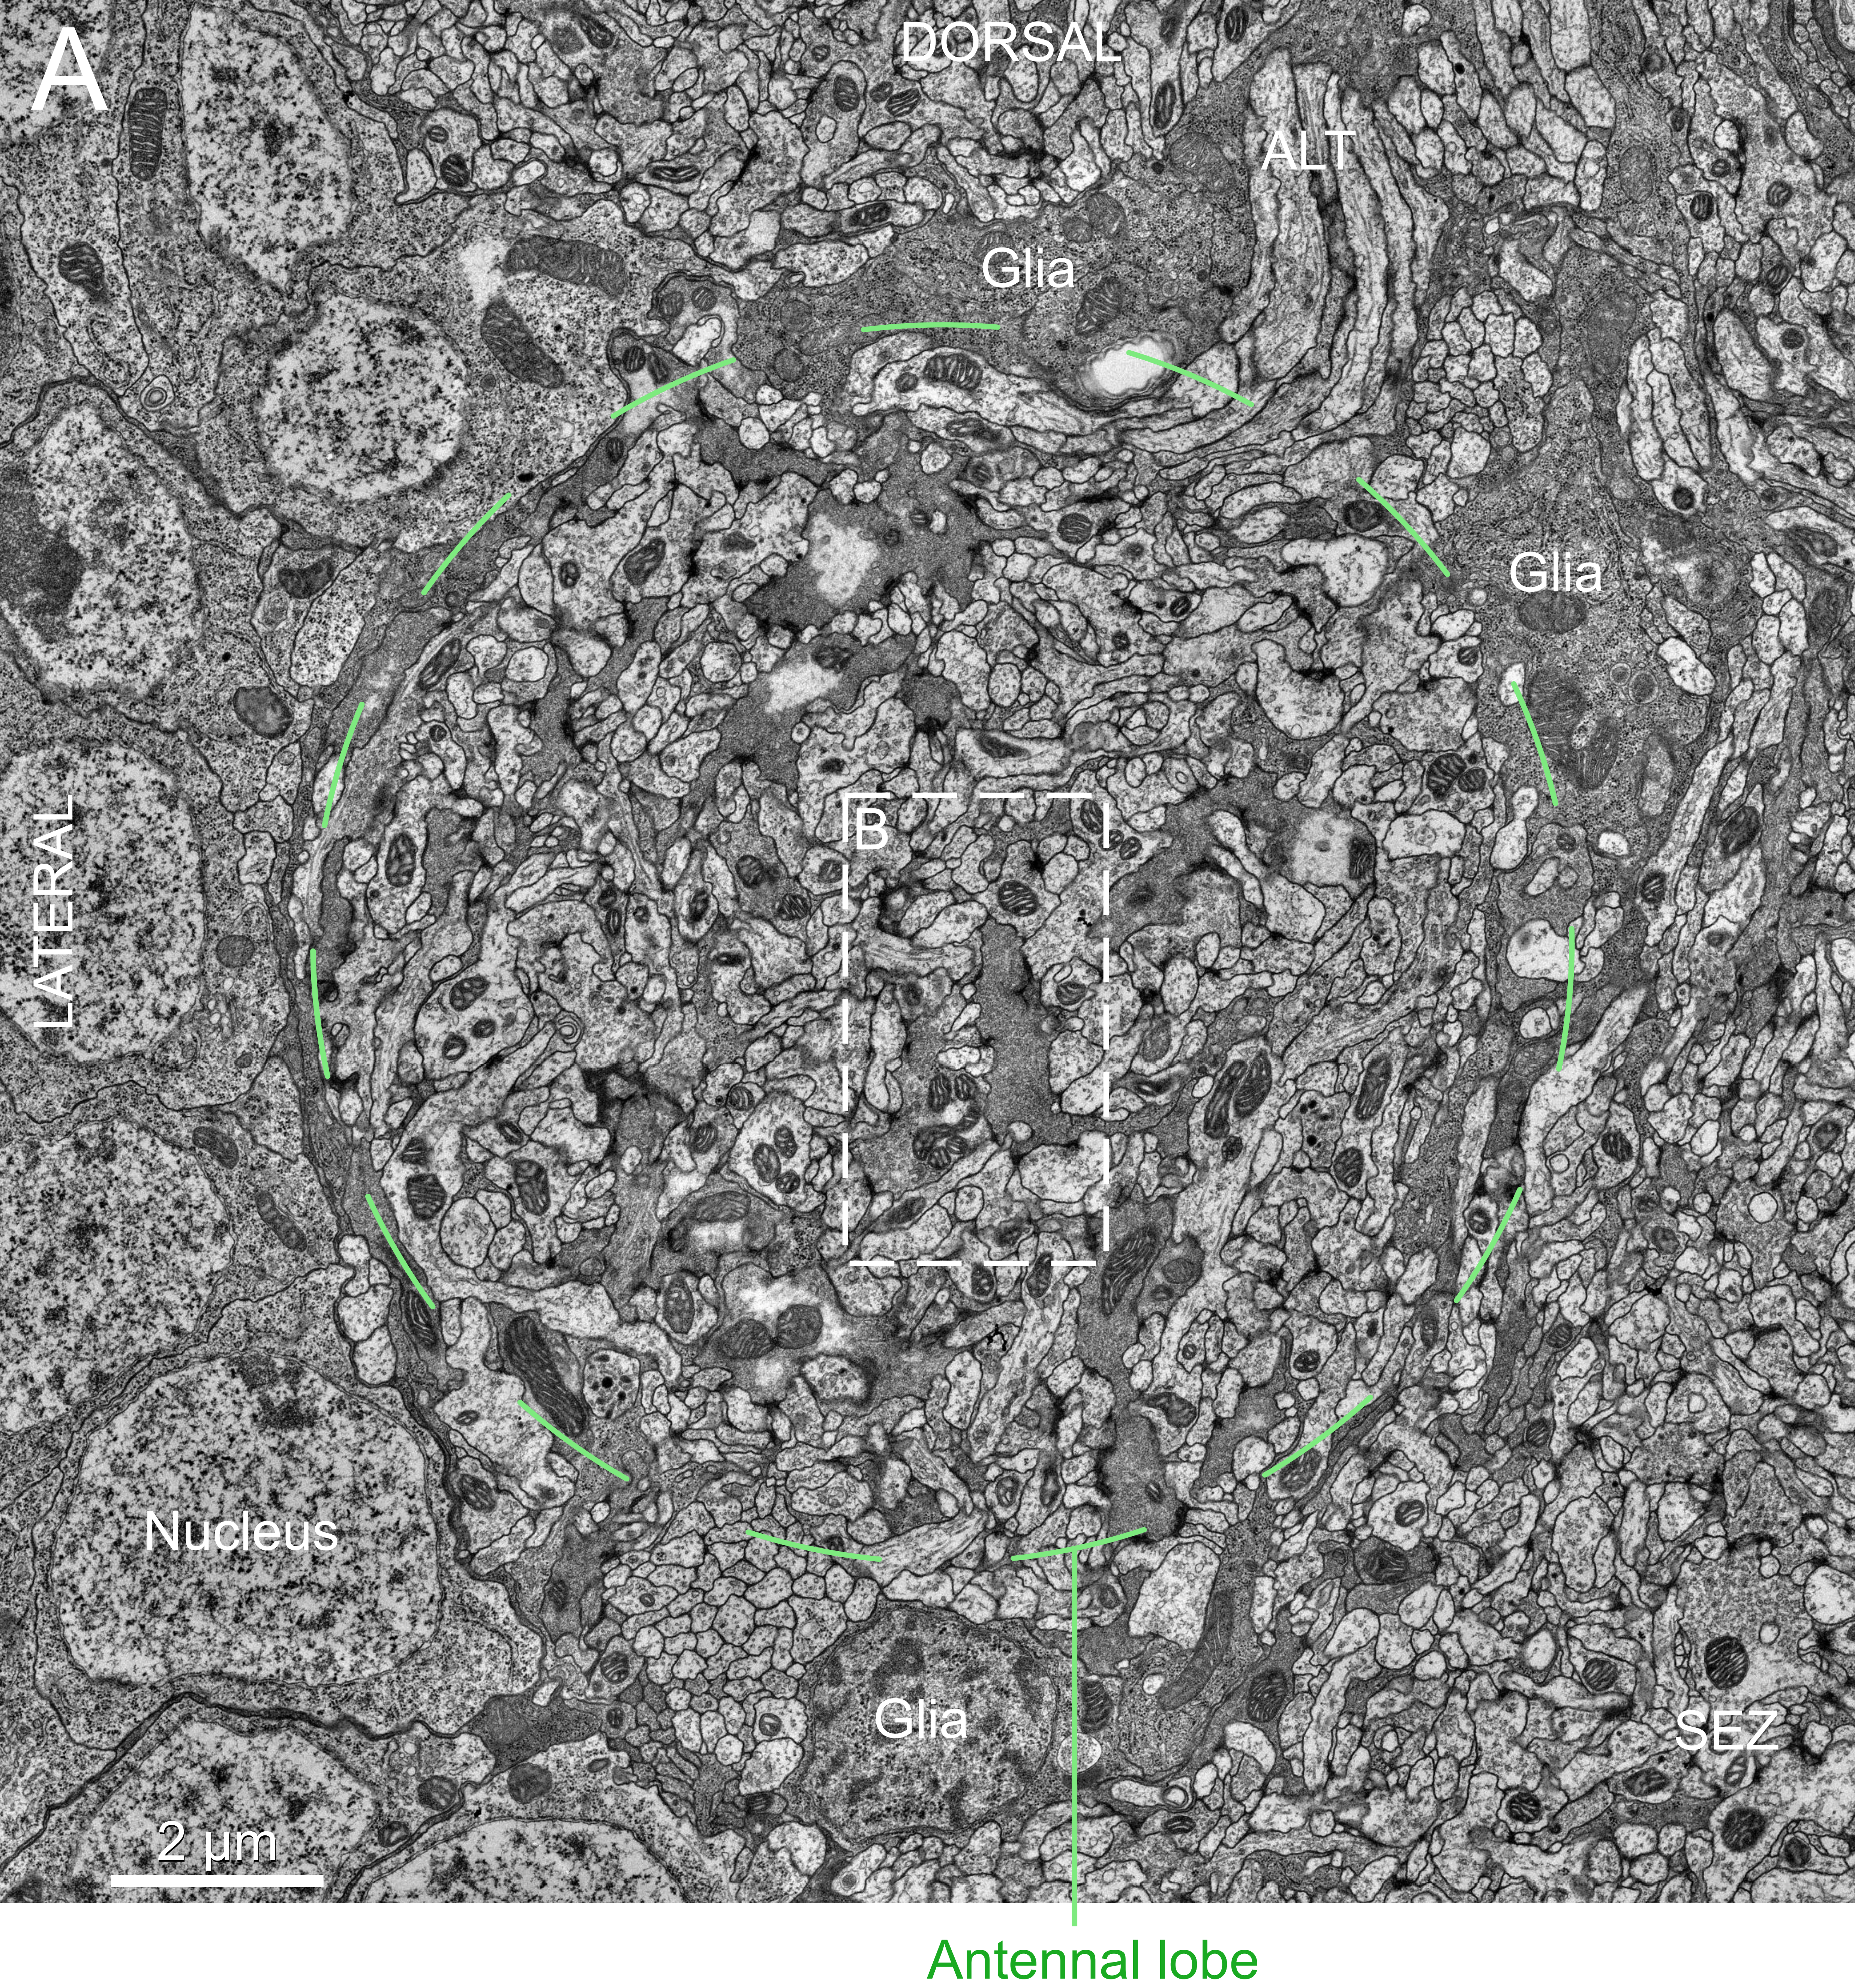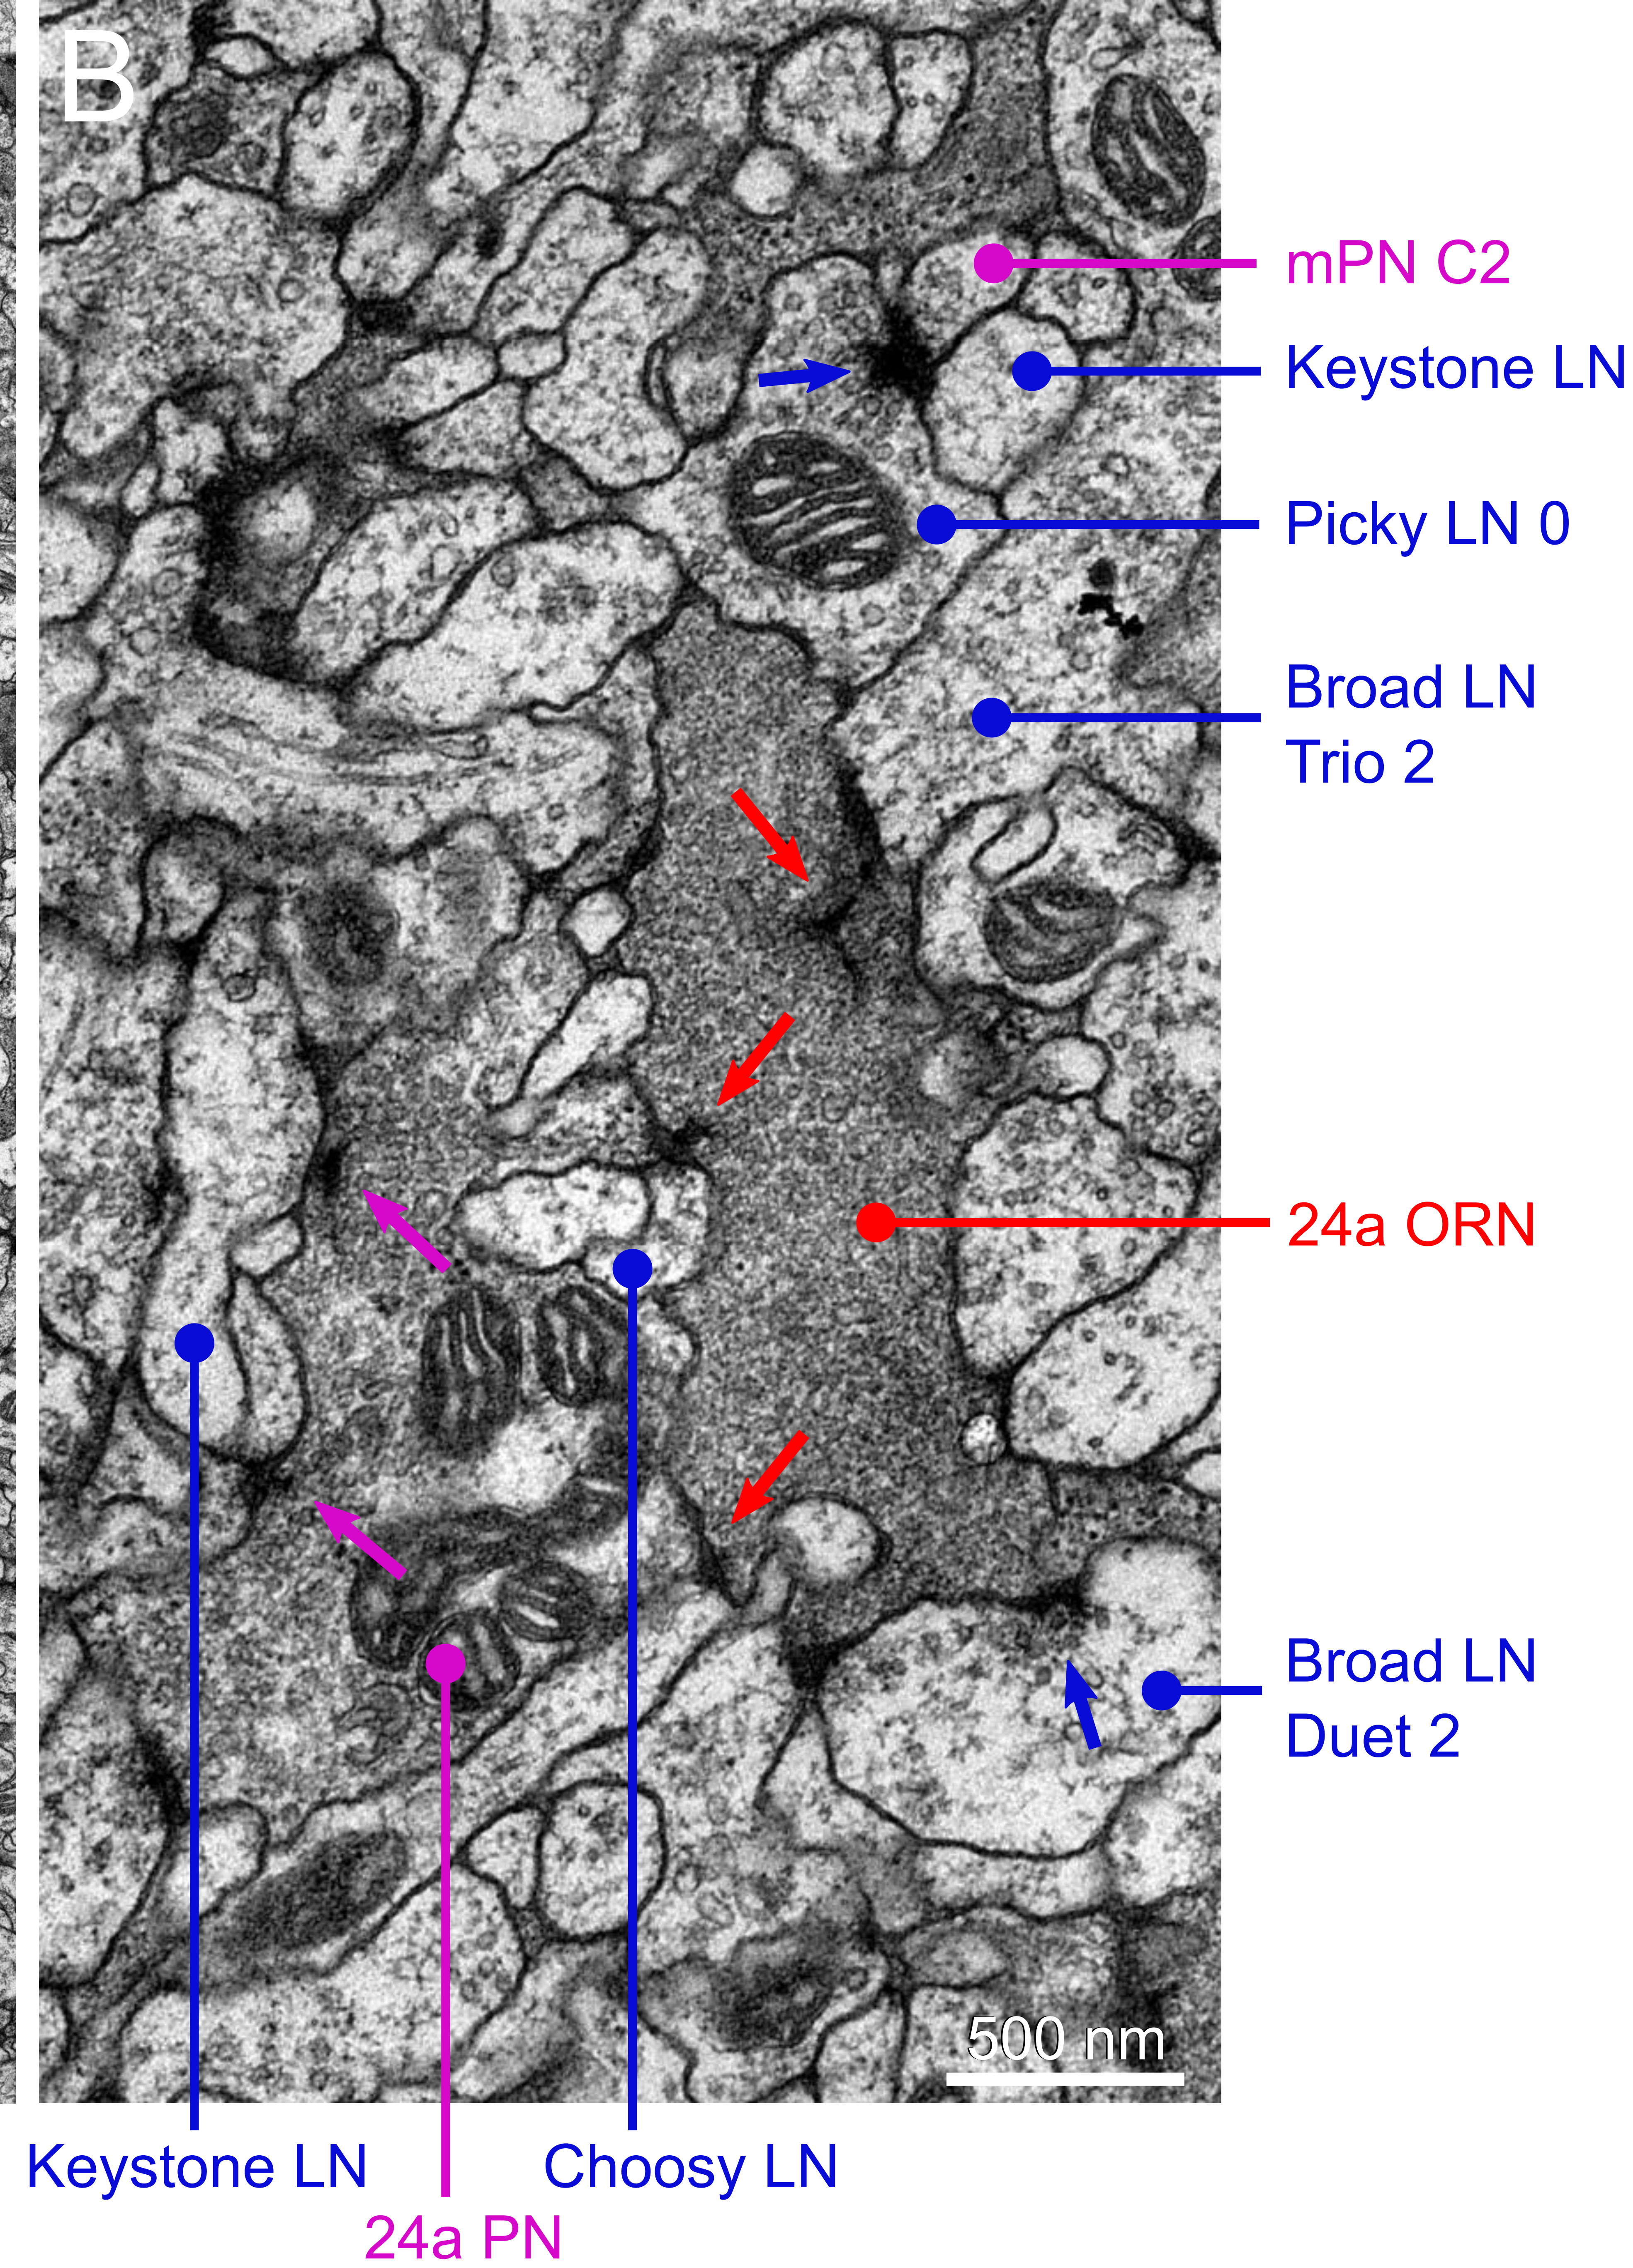

Supplement: supp [file elife-14859-supp-v1.zip]

EM-RECONSTRUCTIONS

Keystone LN

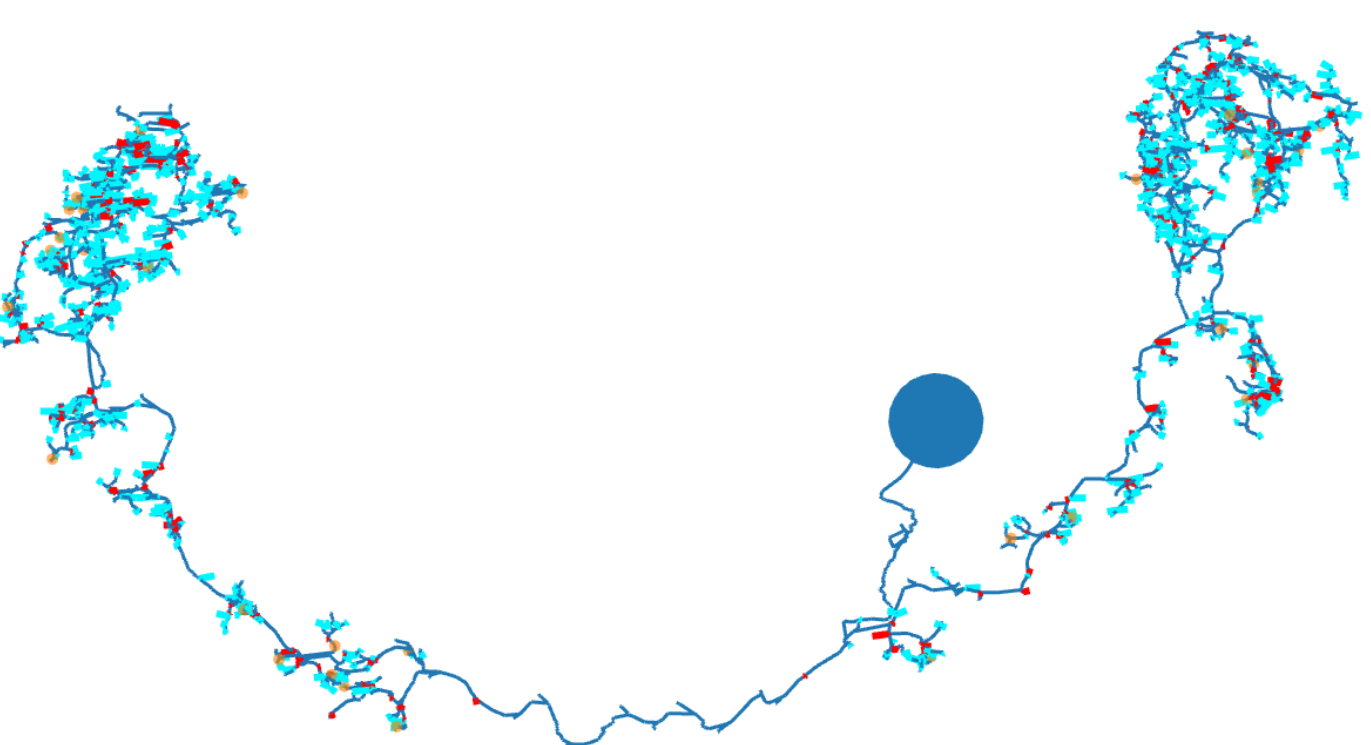

Picky LNs

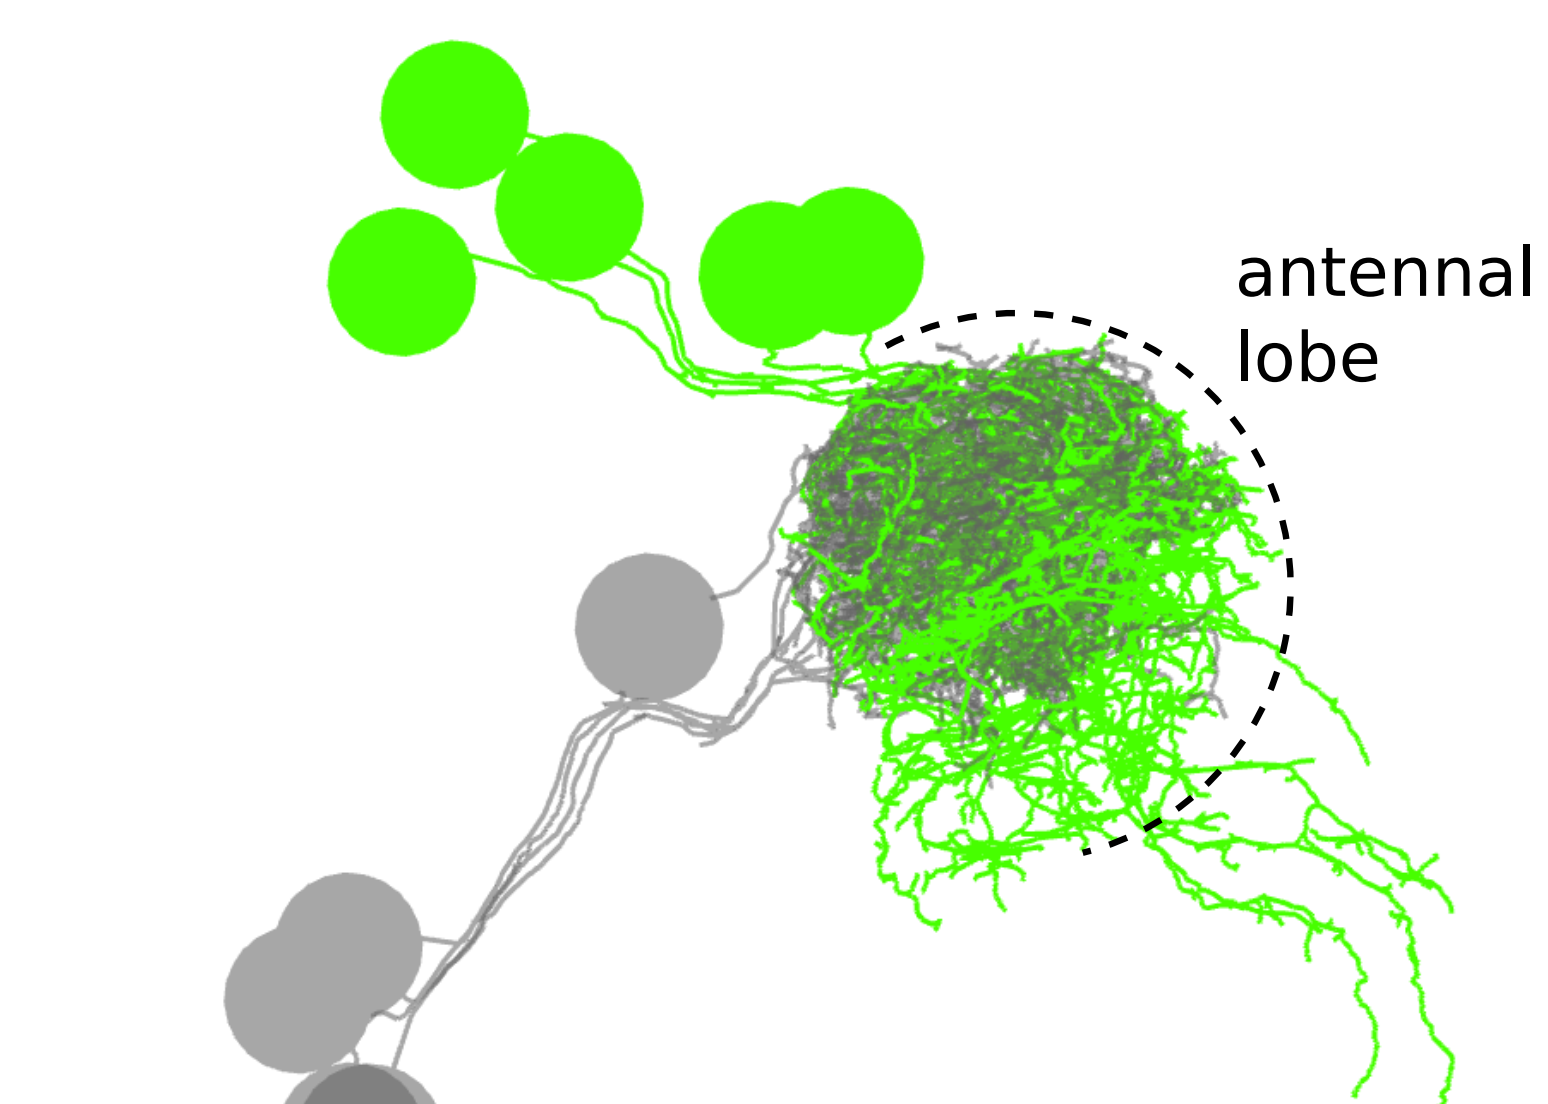

Broad LNs

Picky LN 4

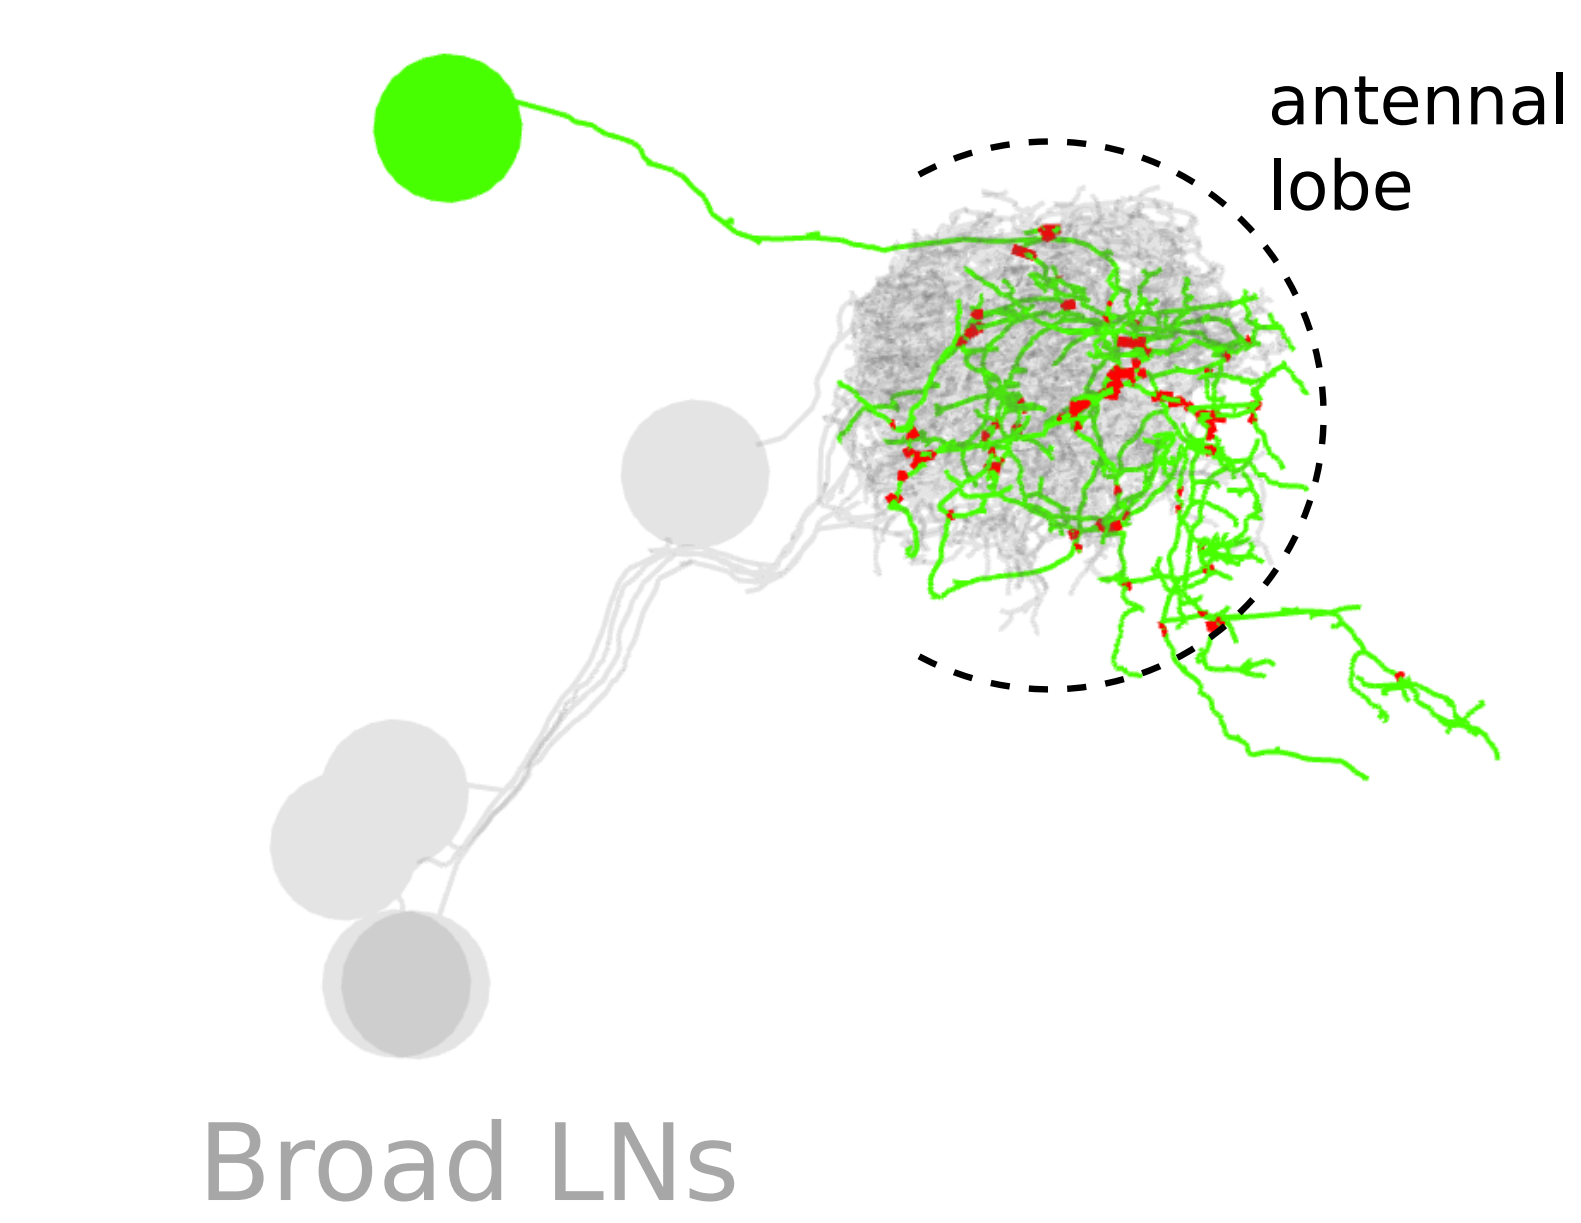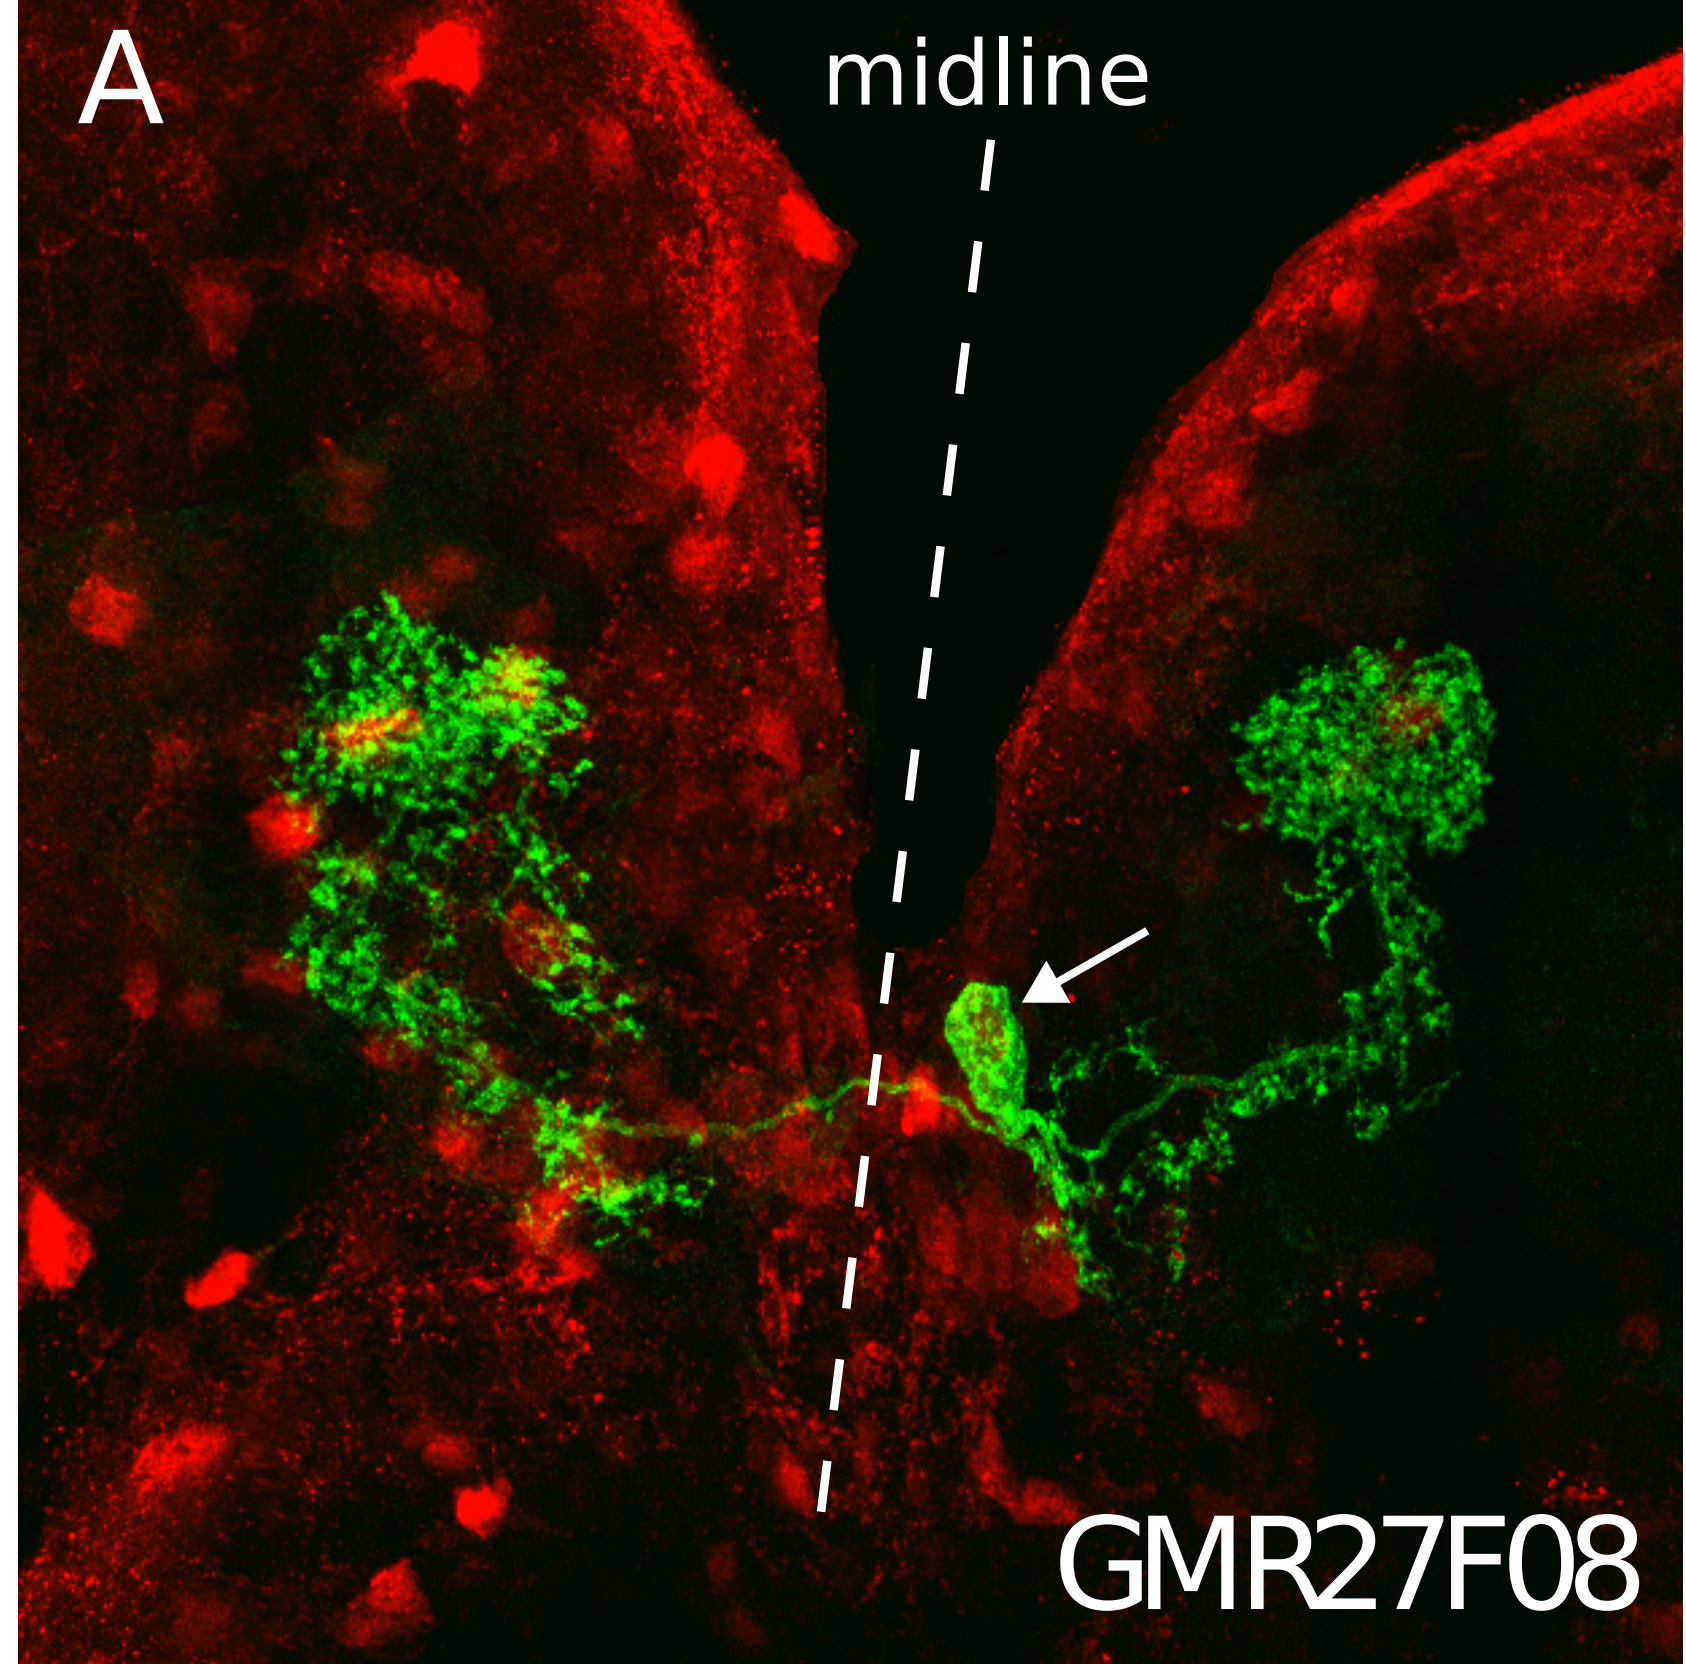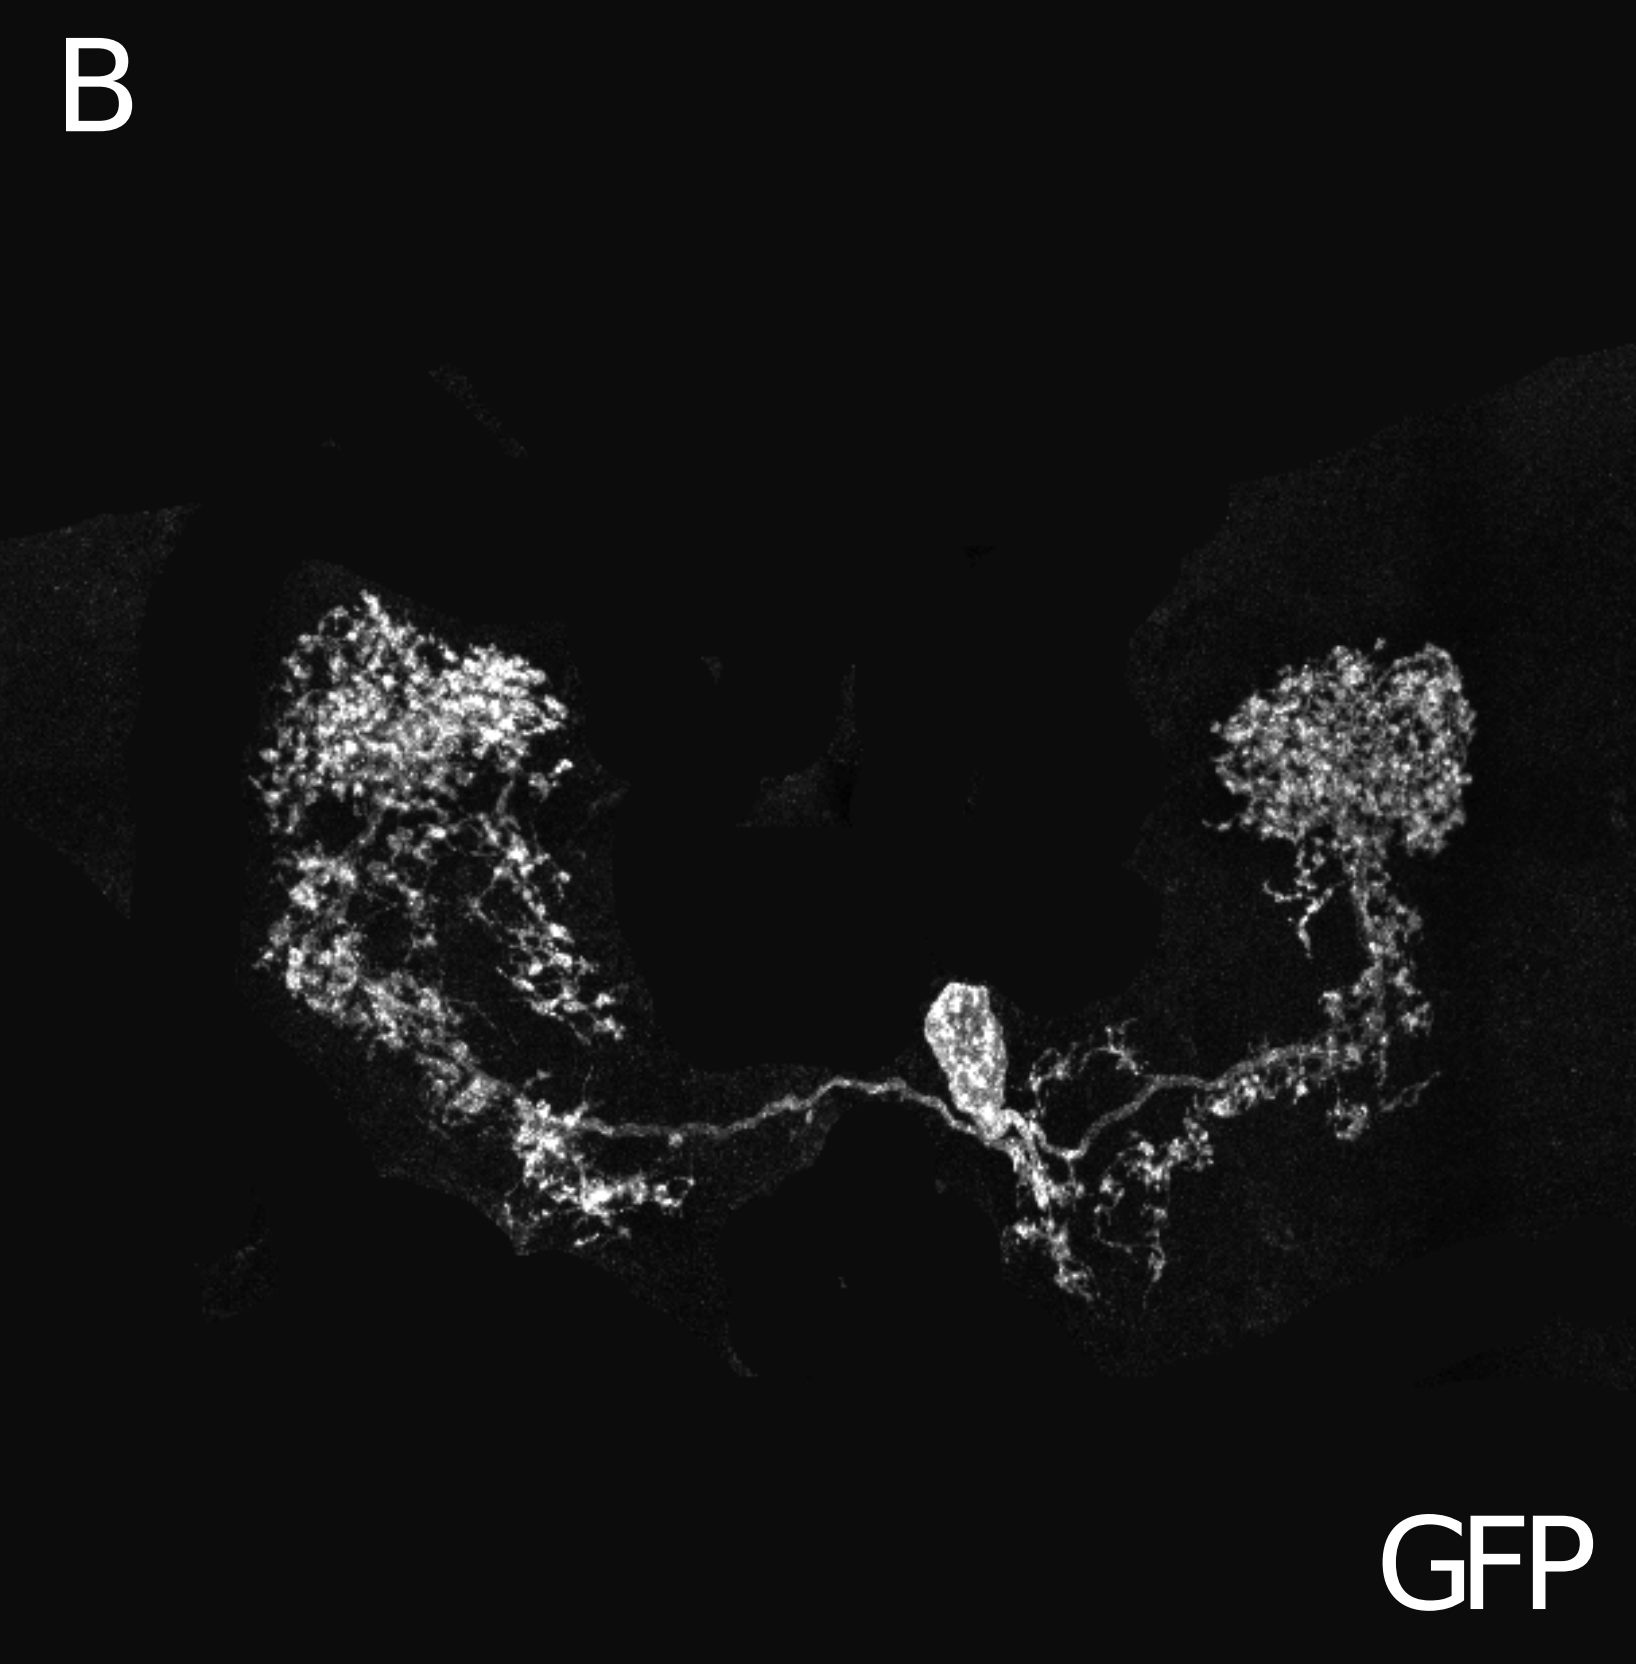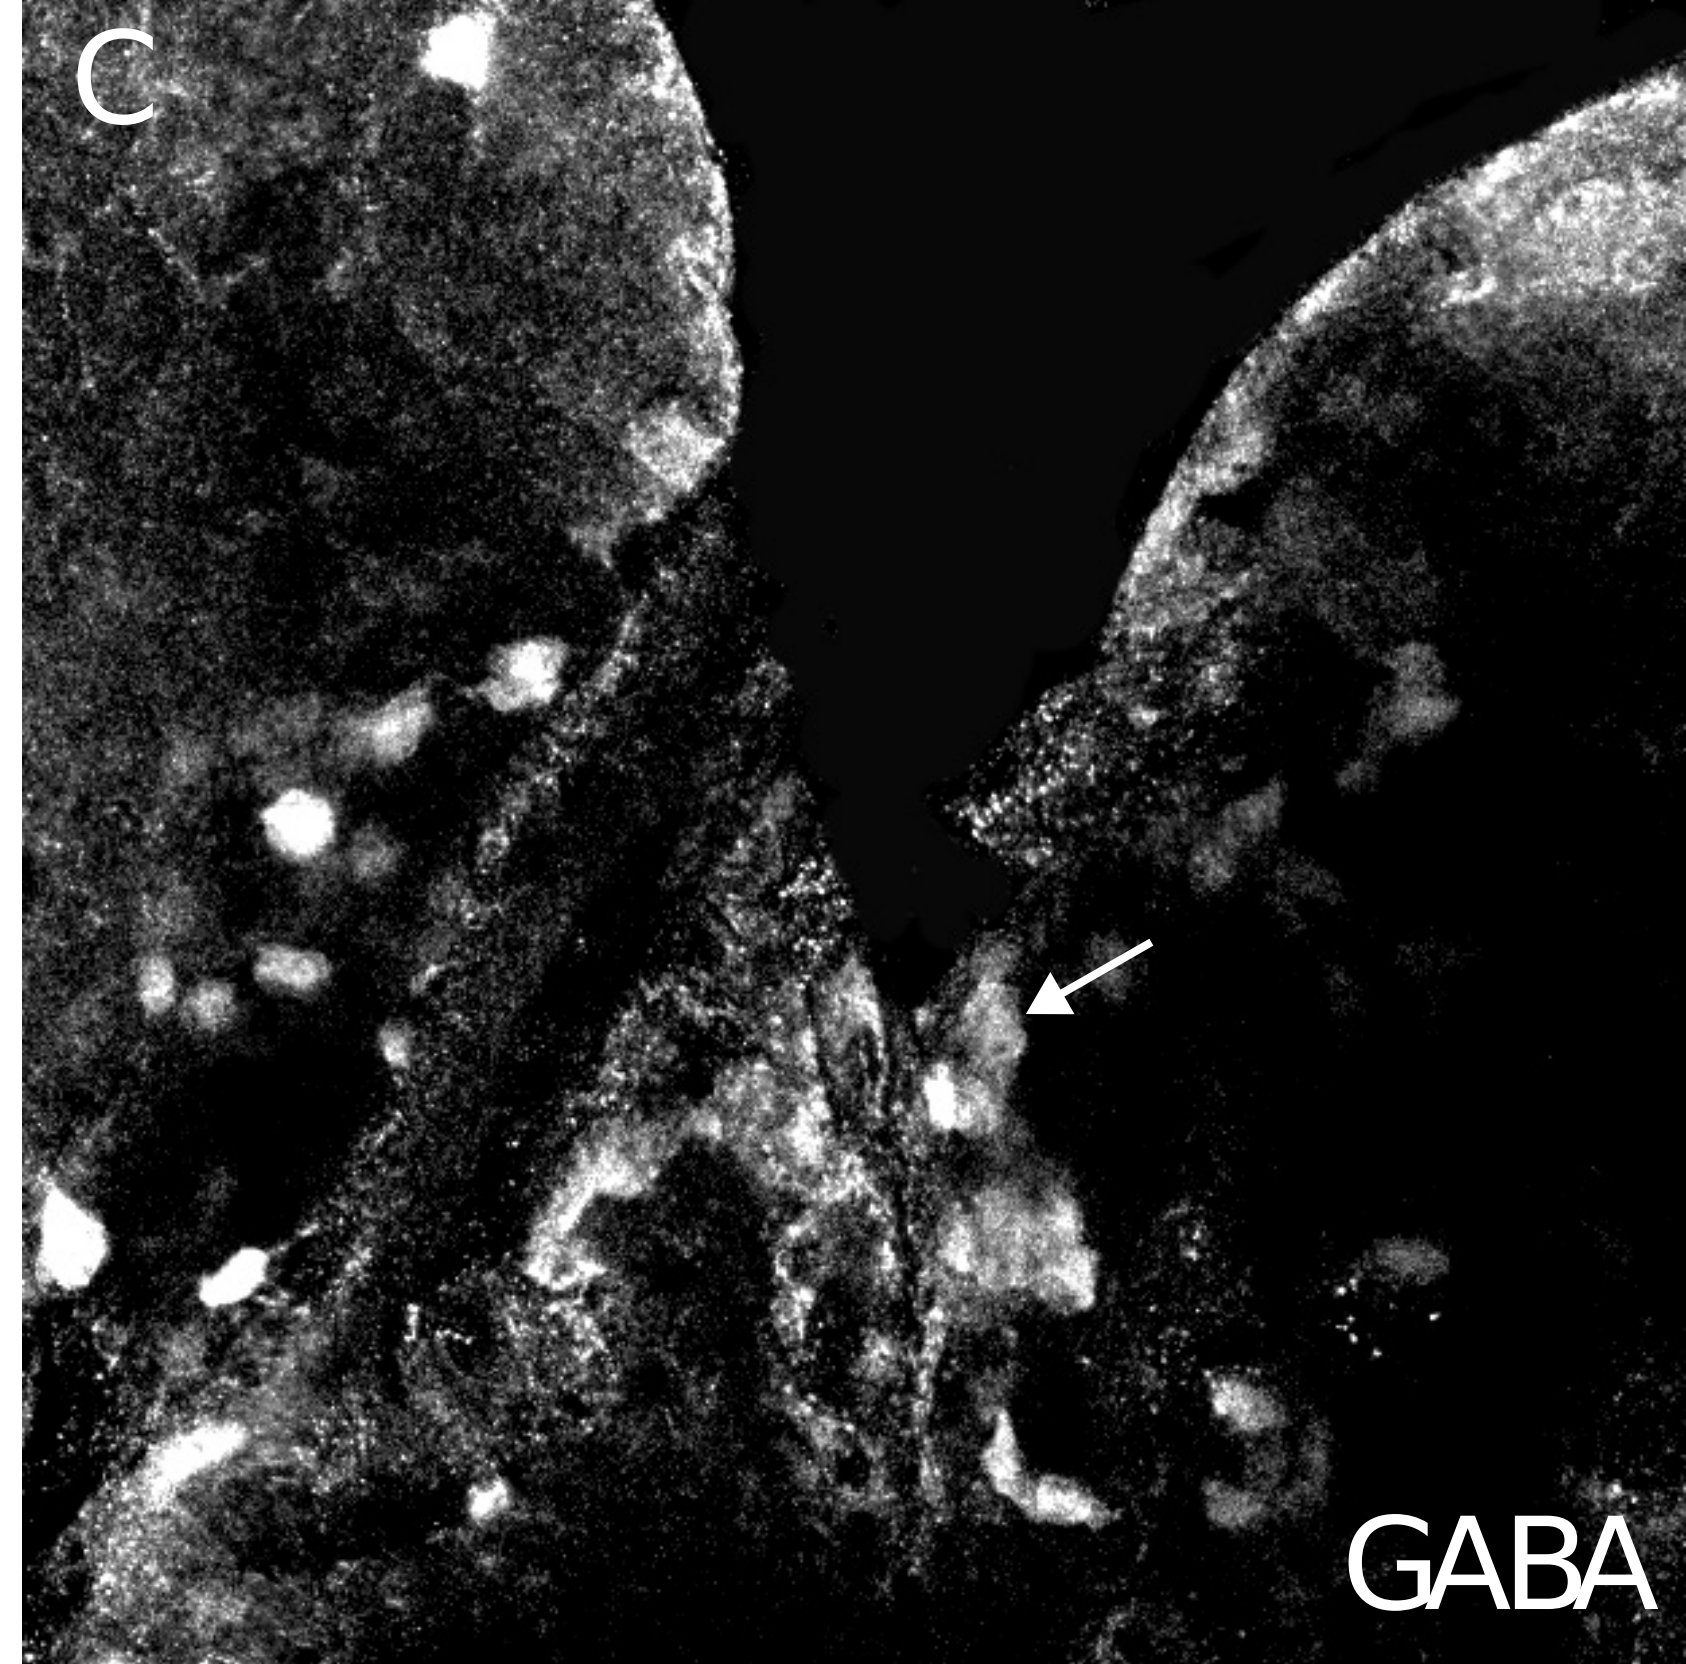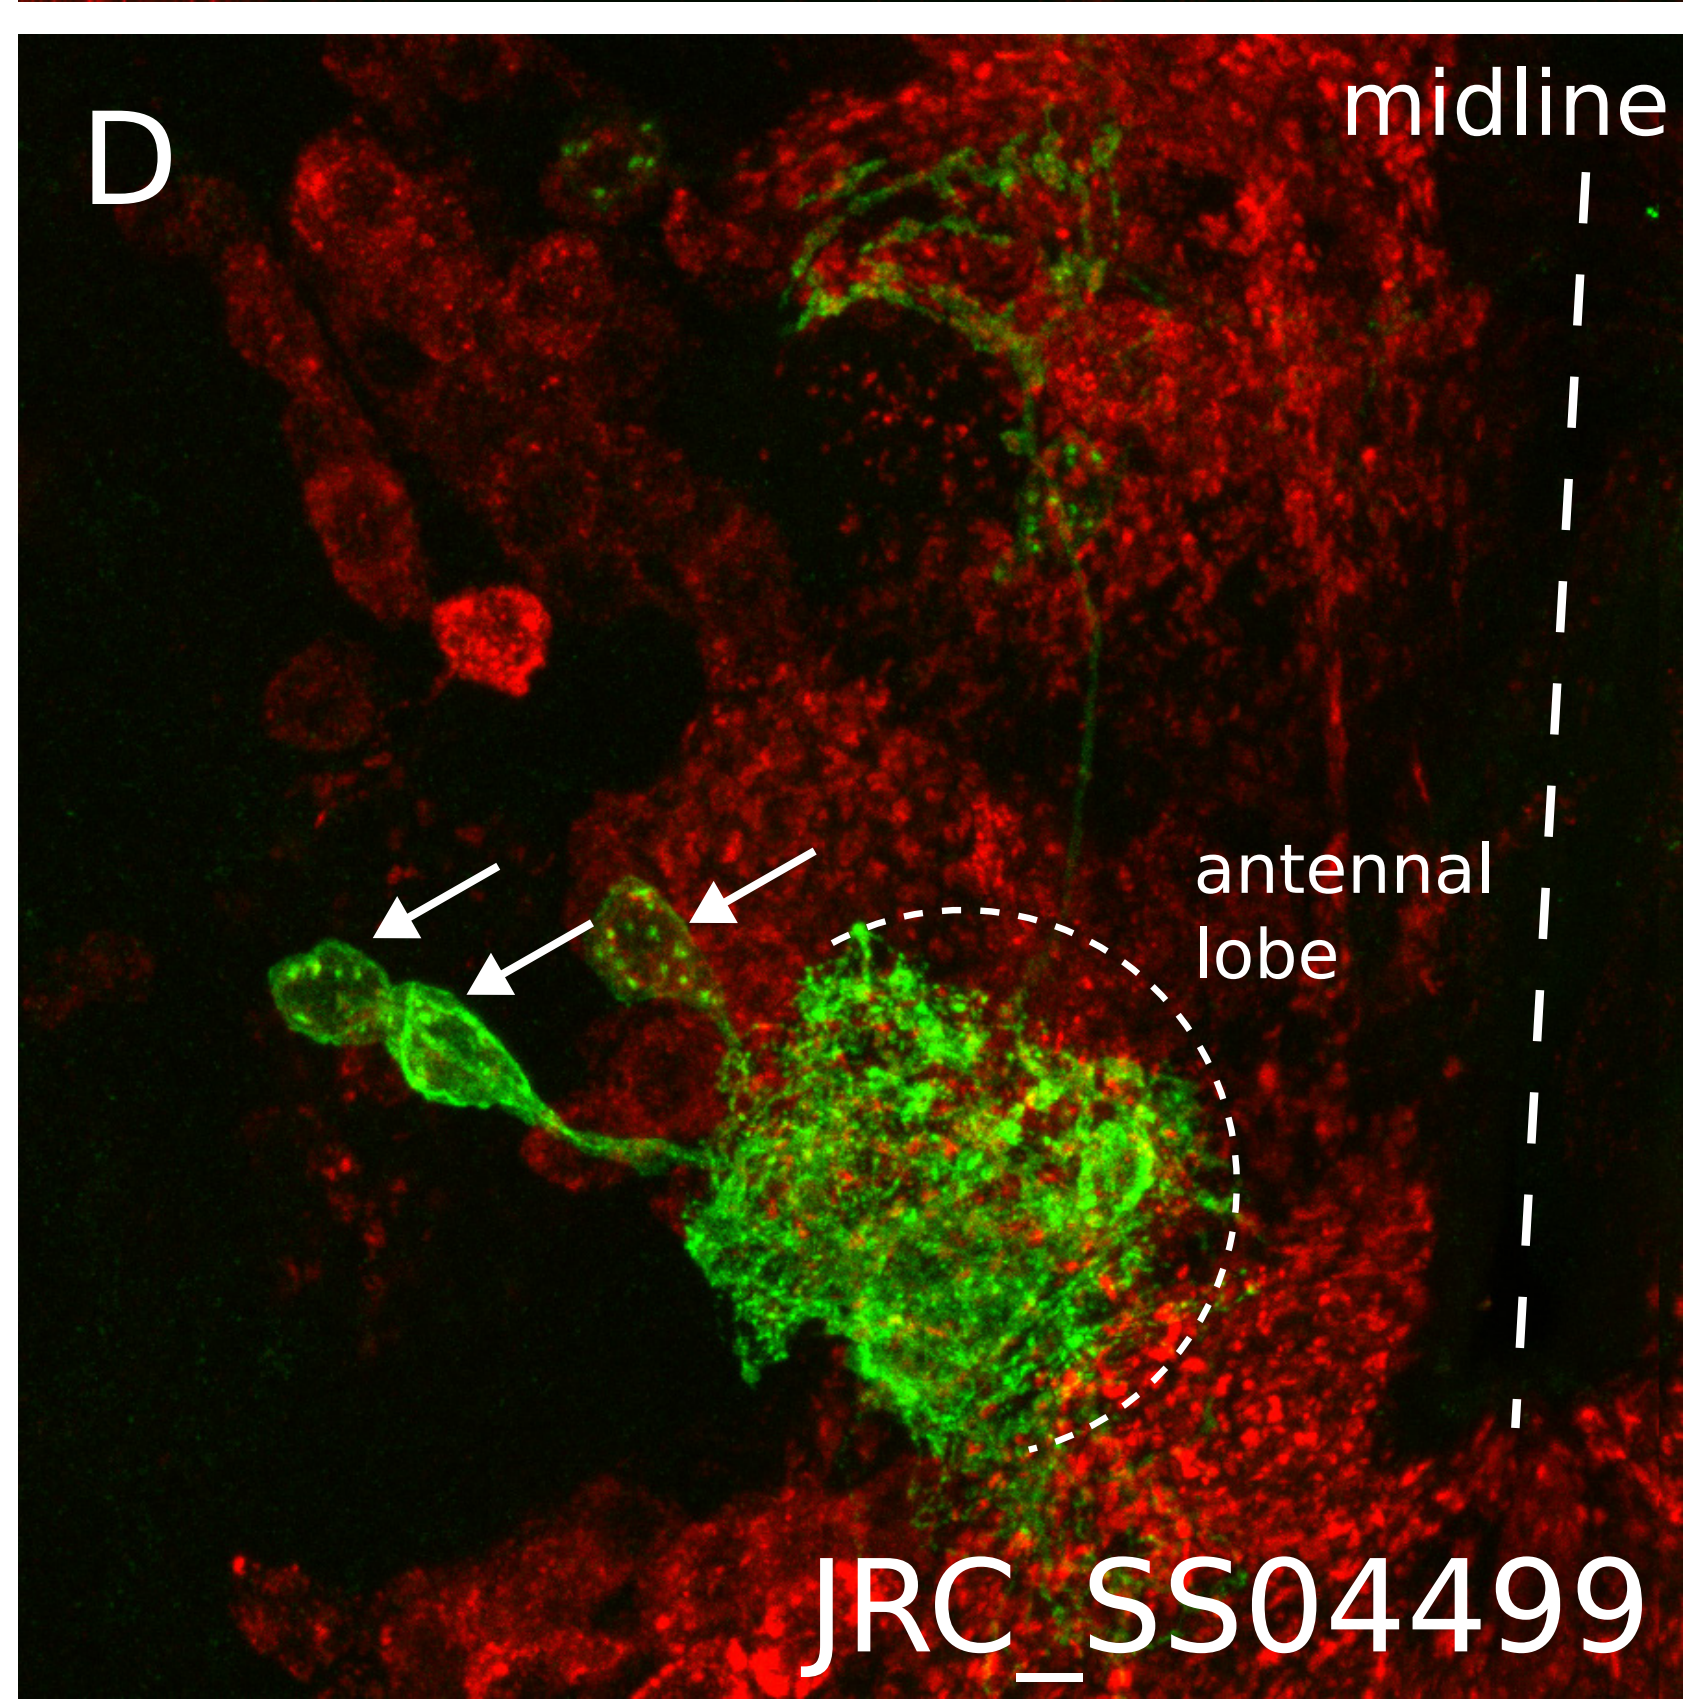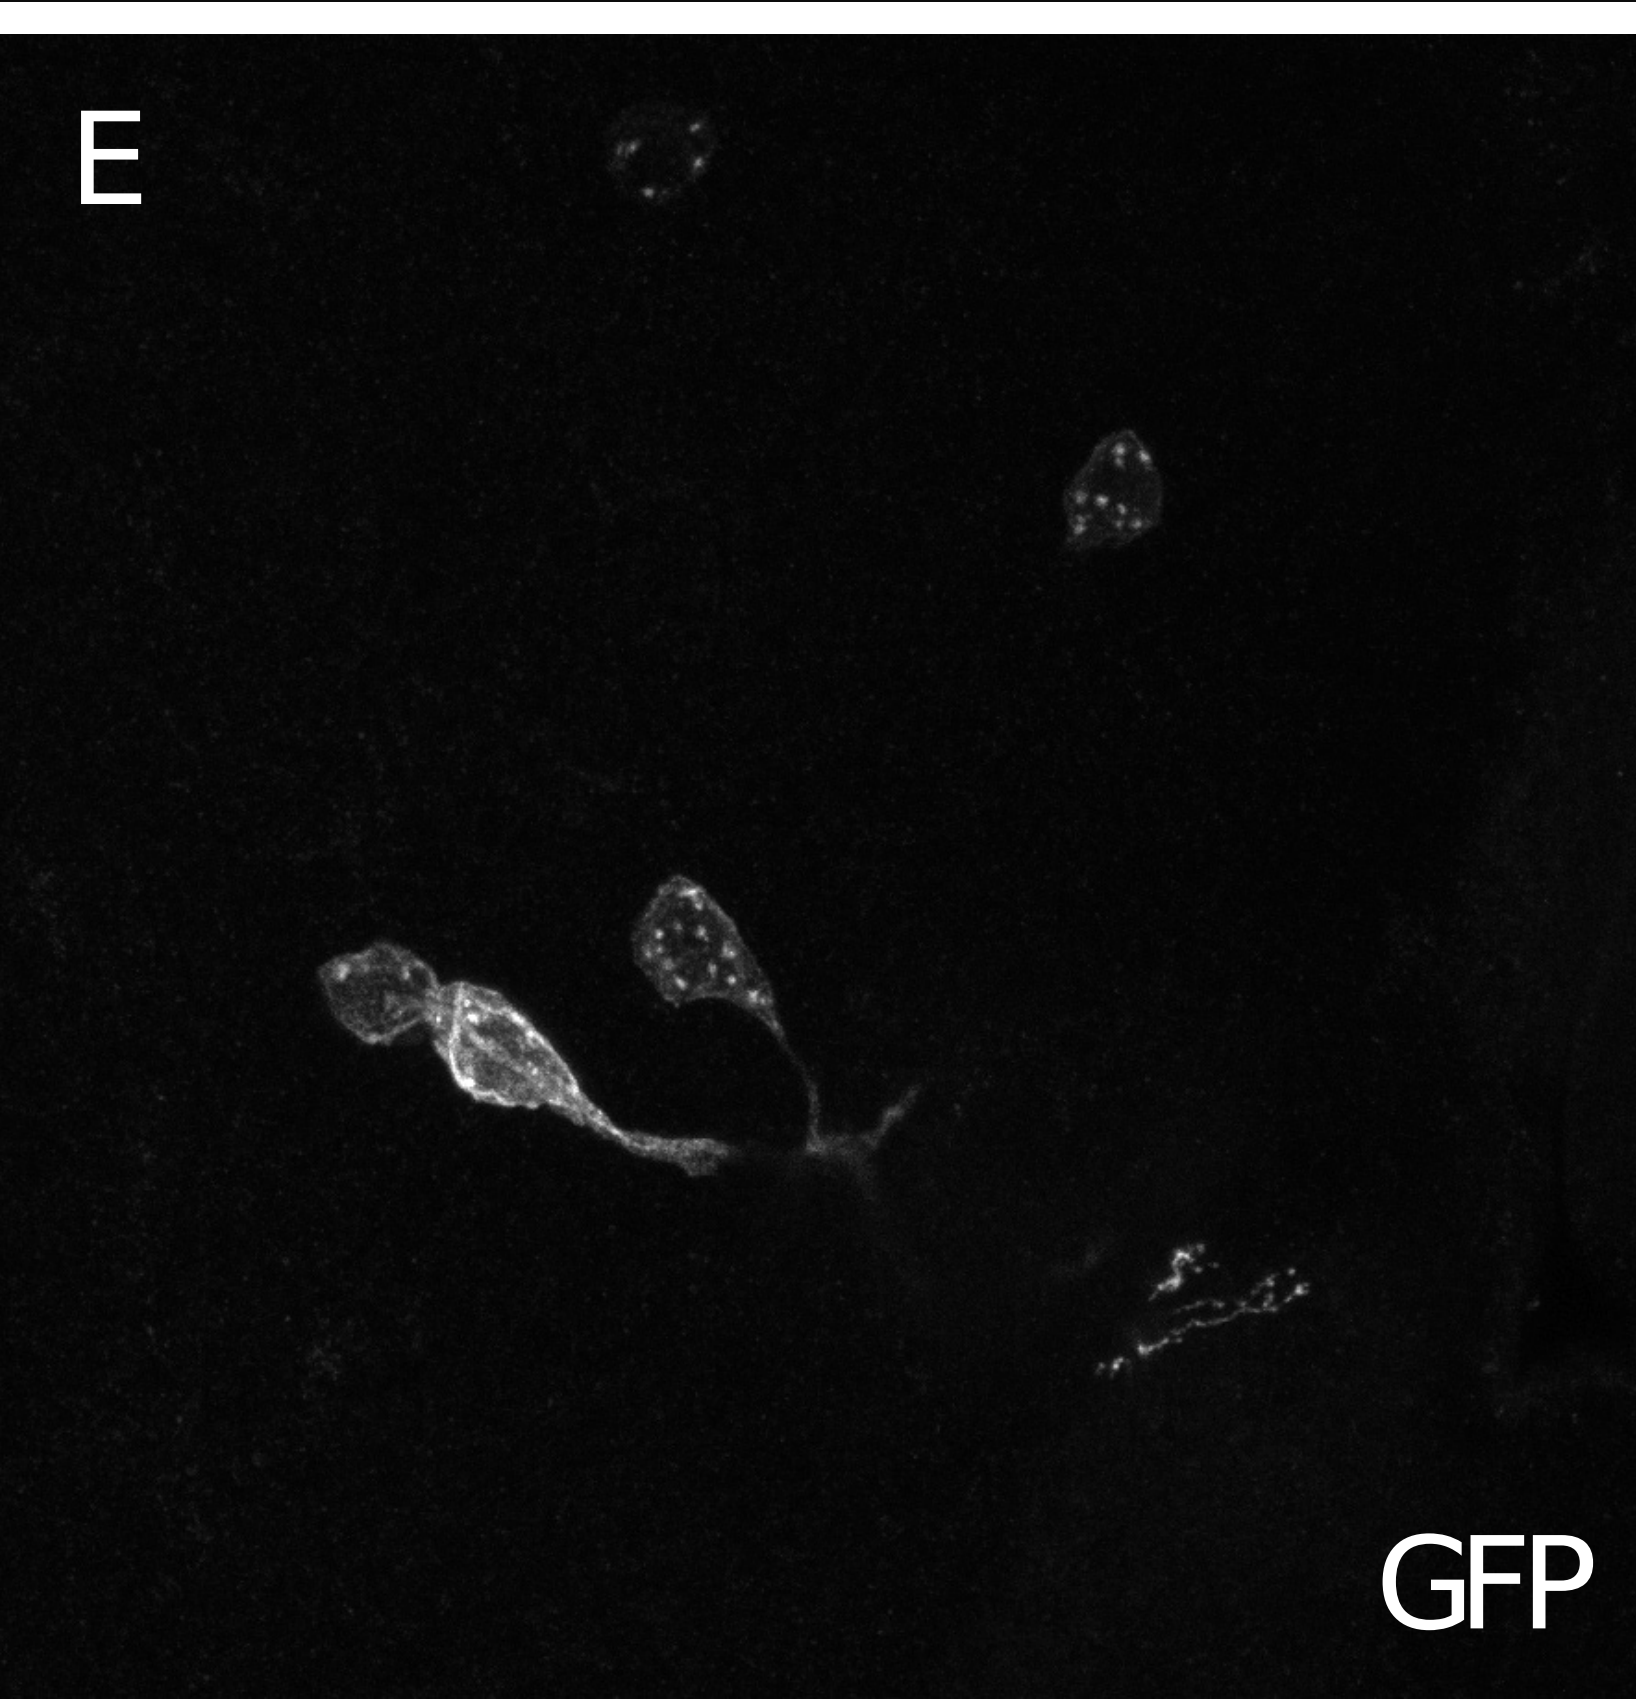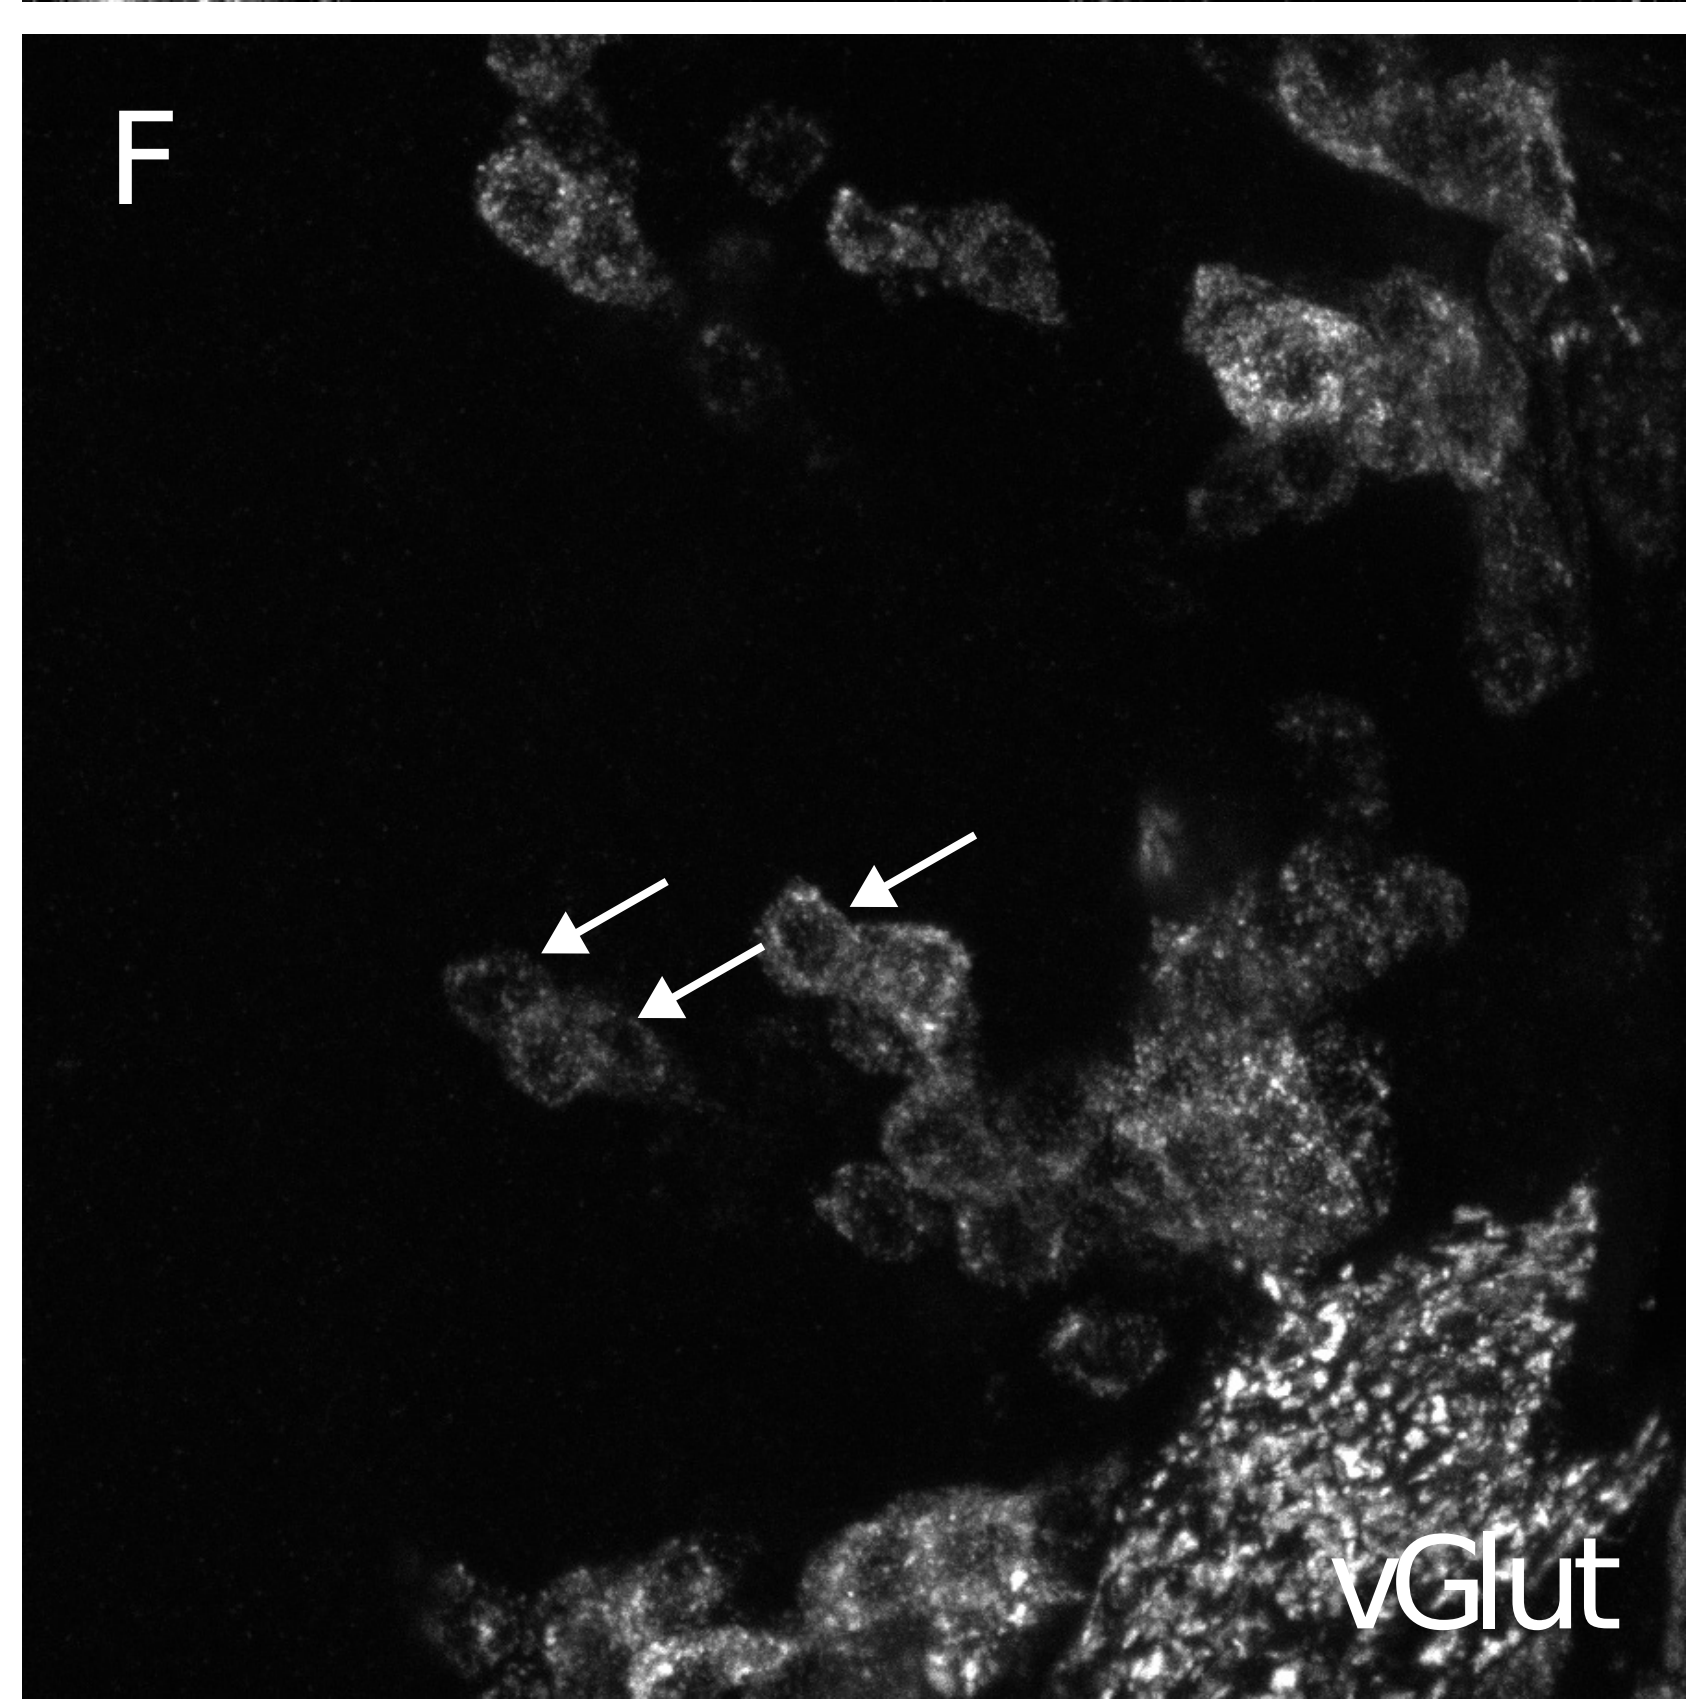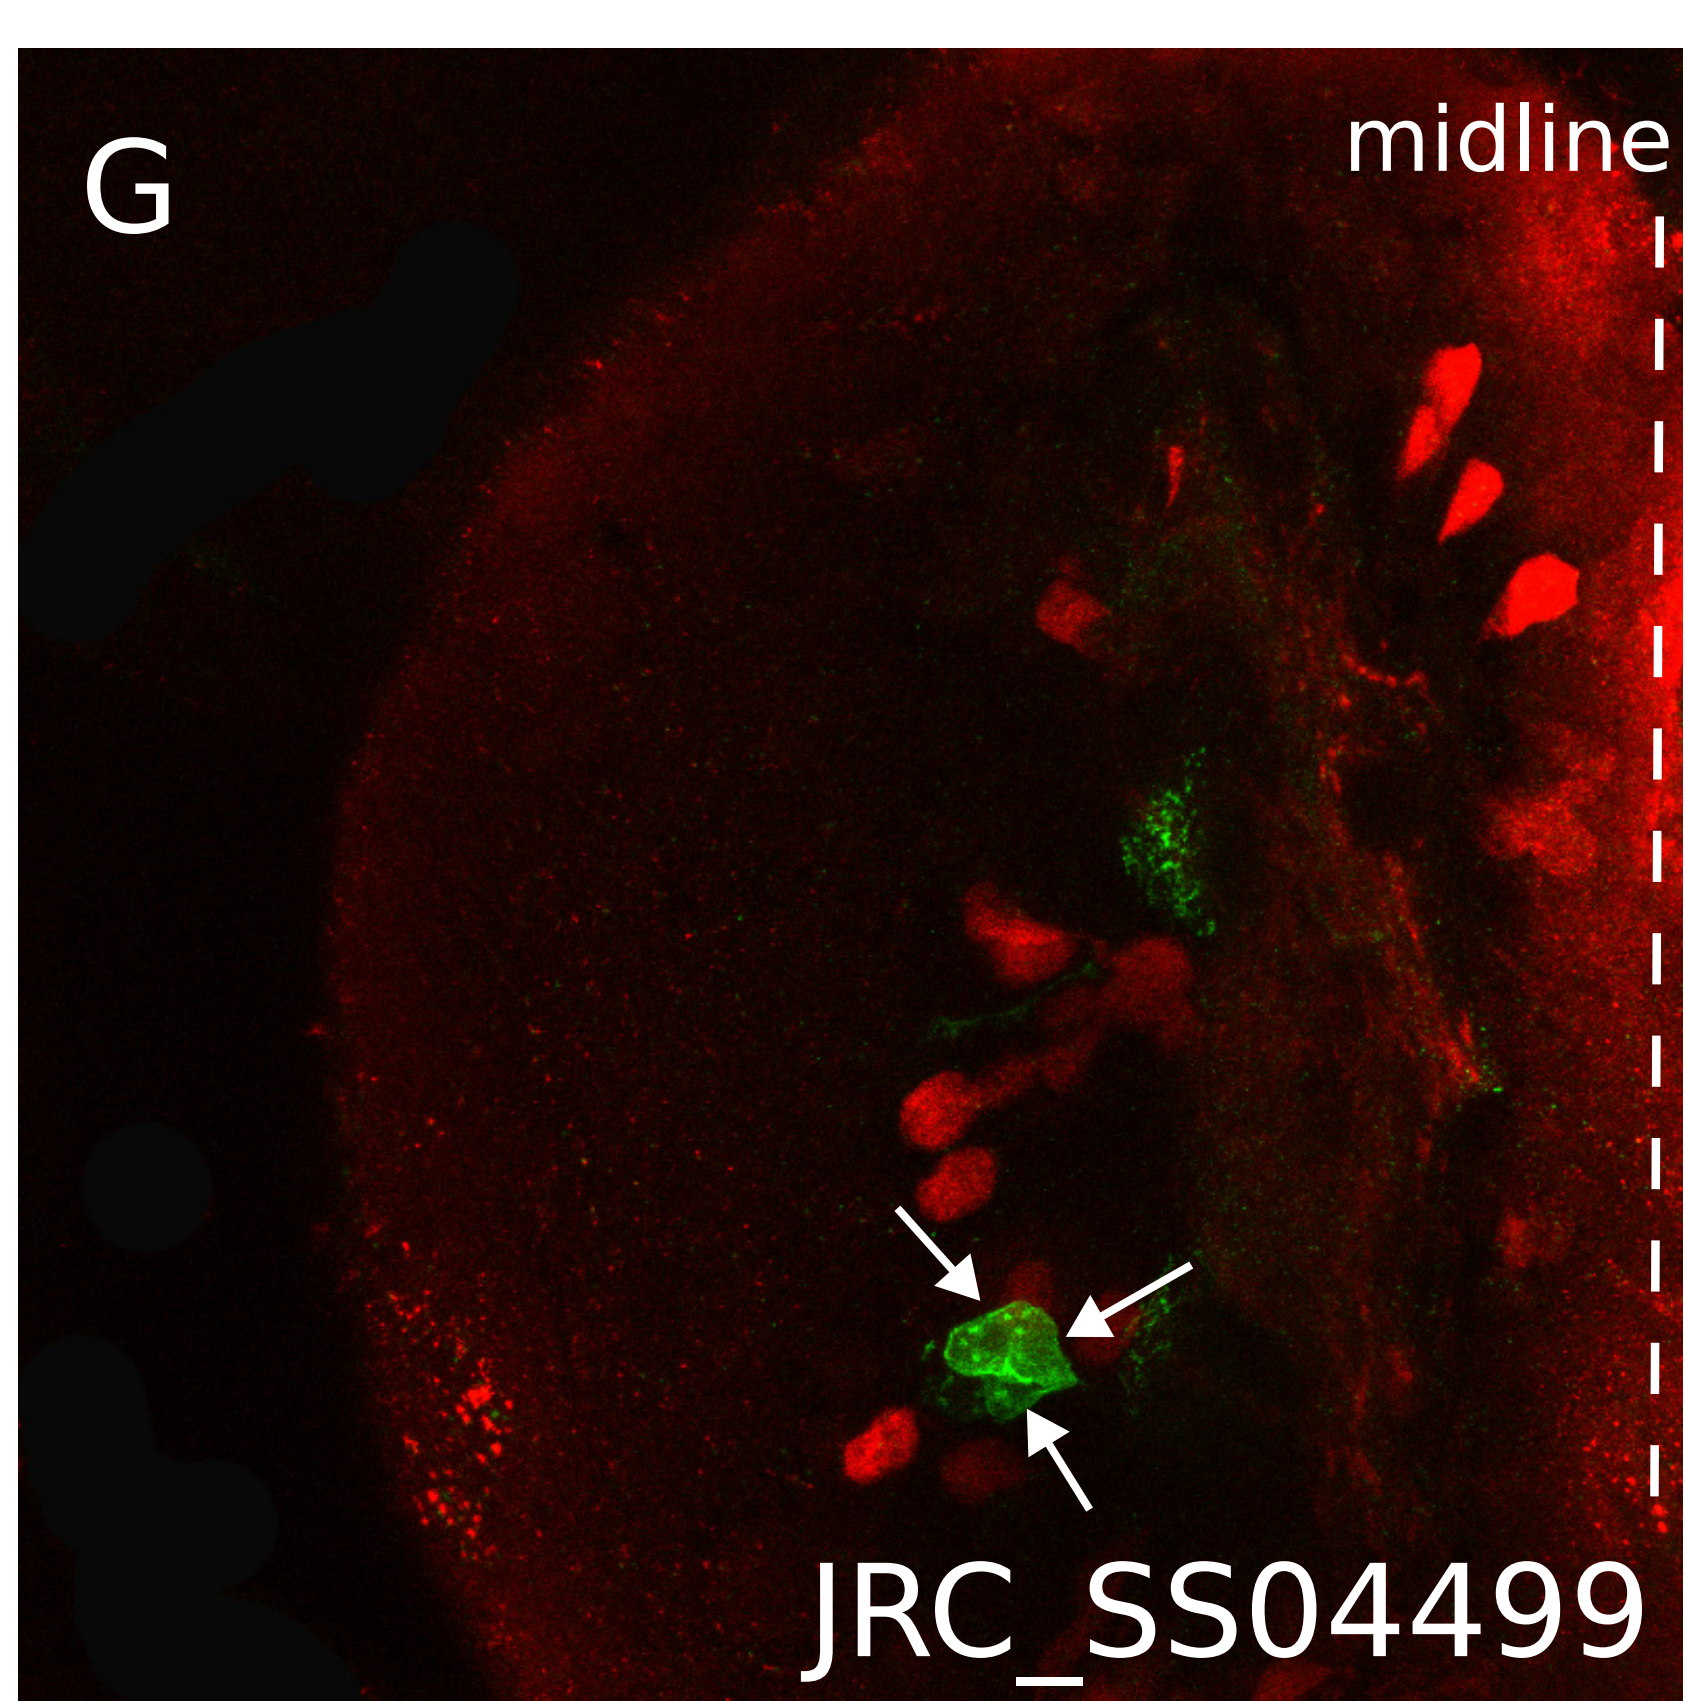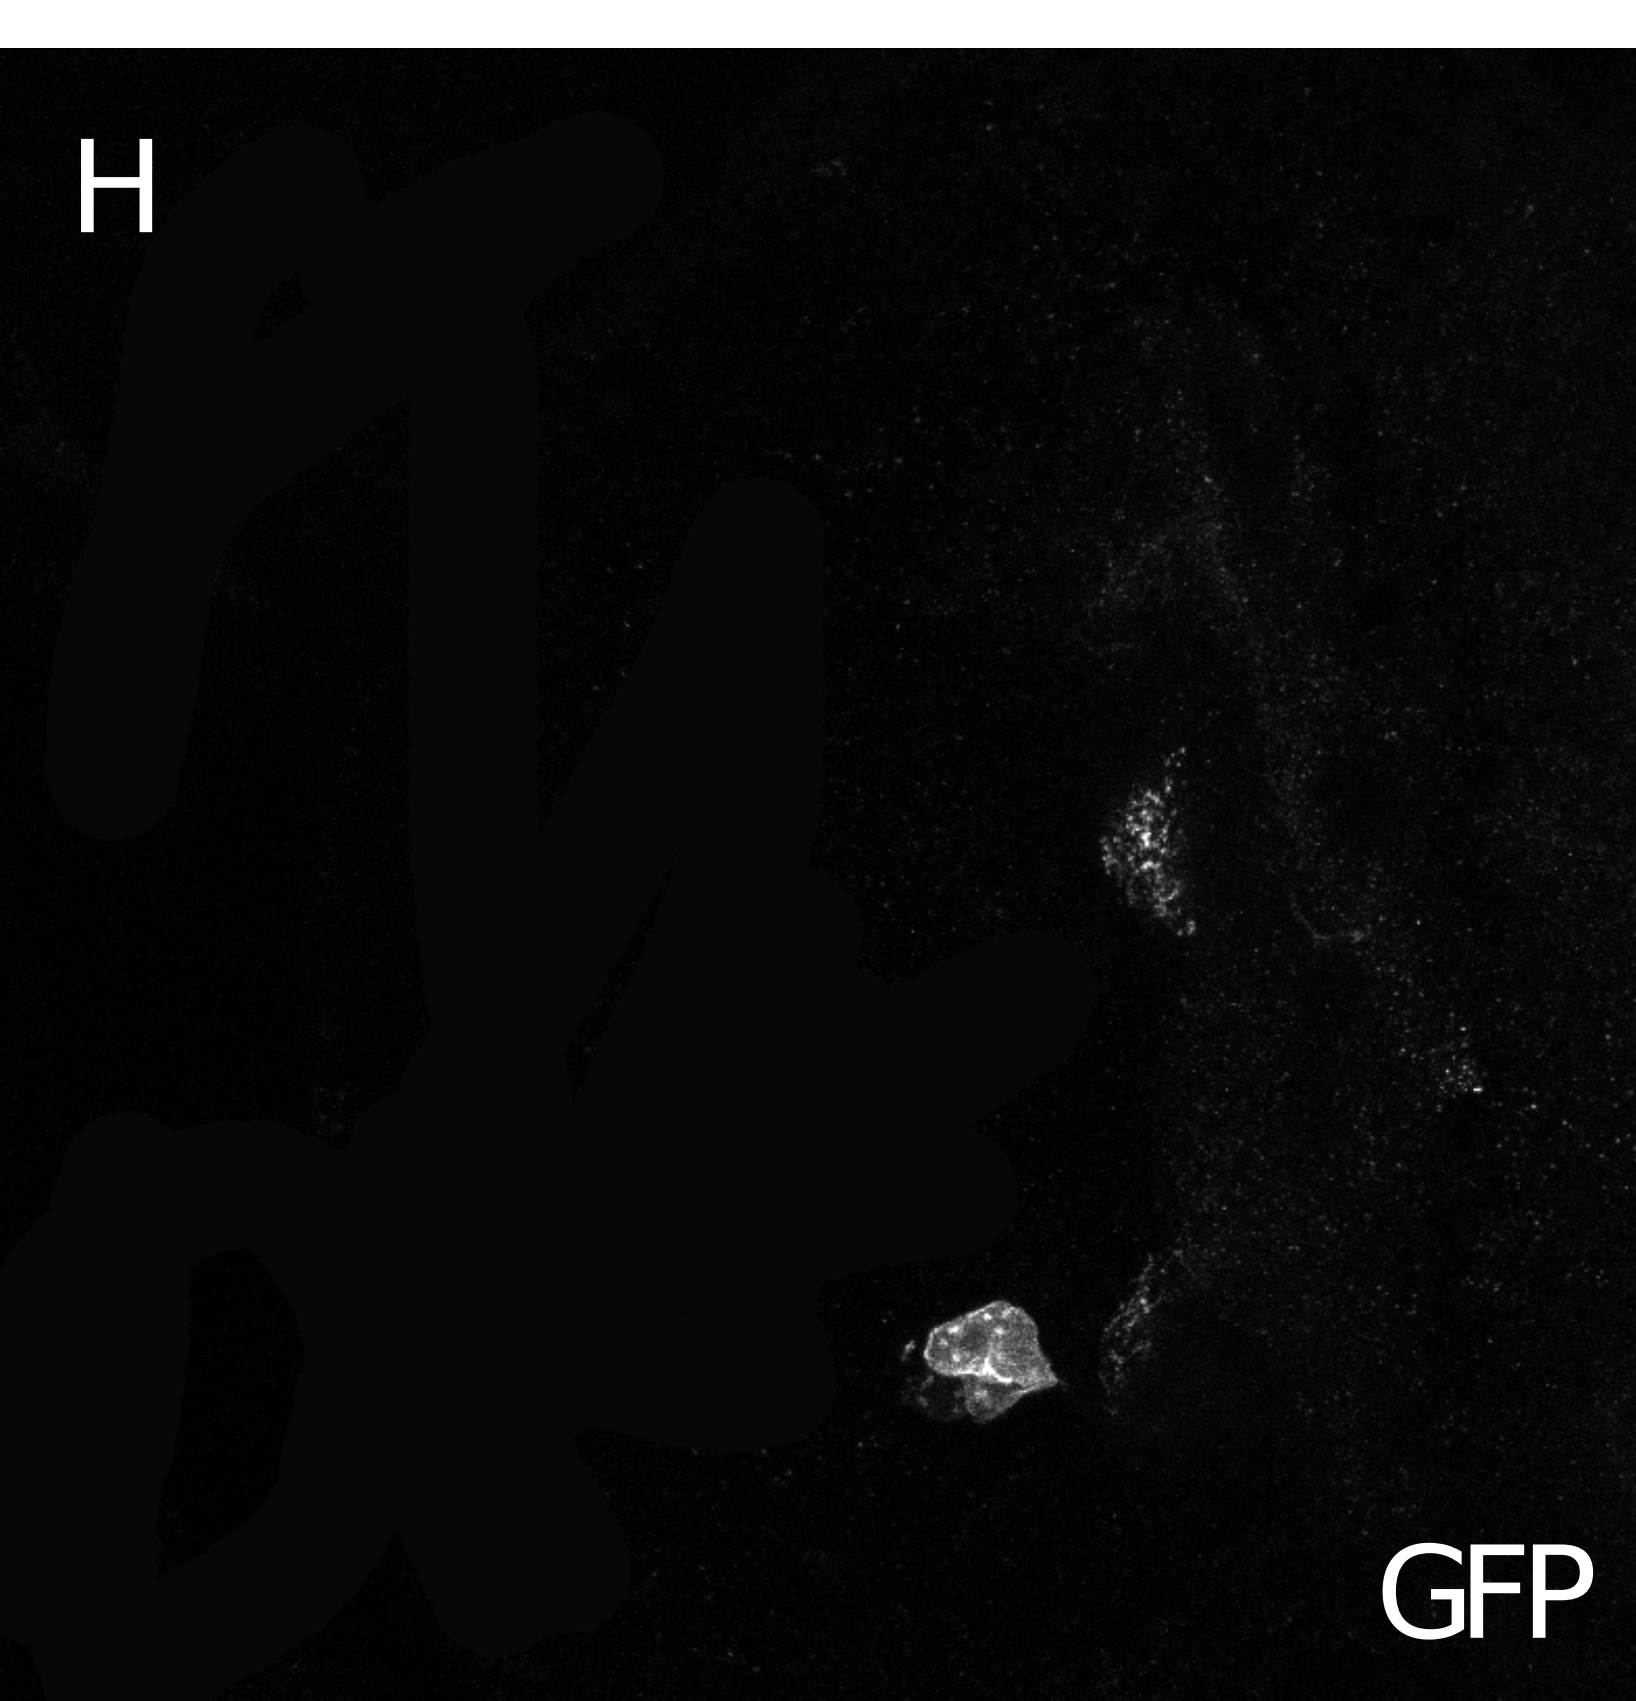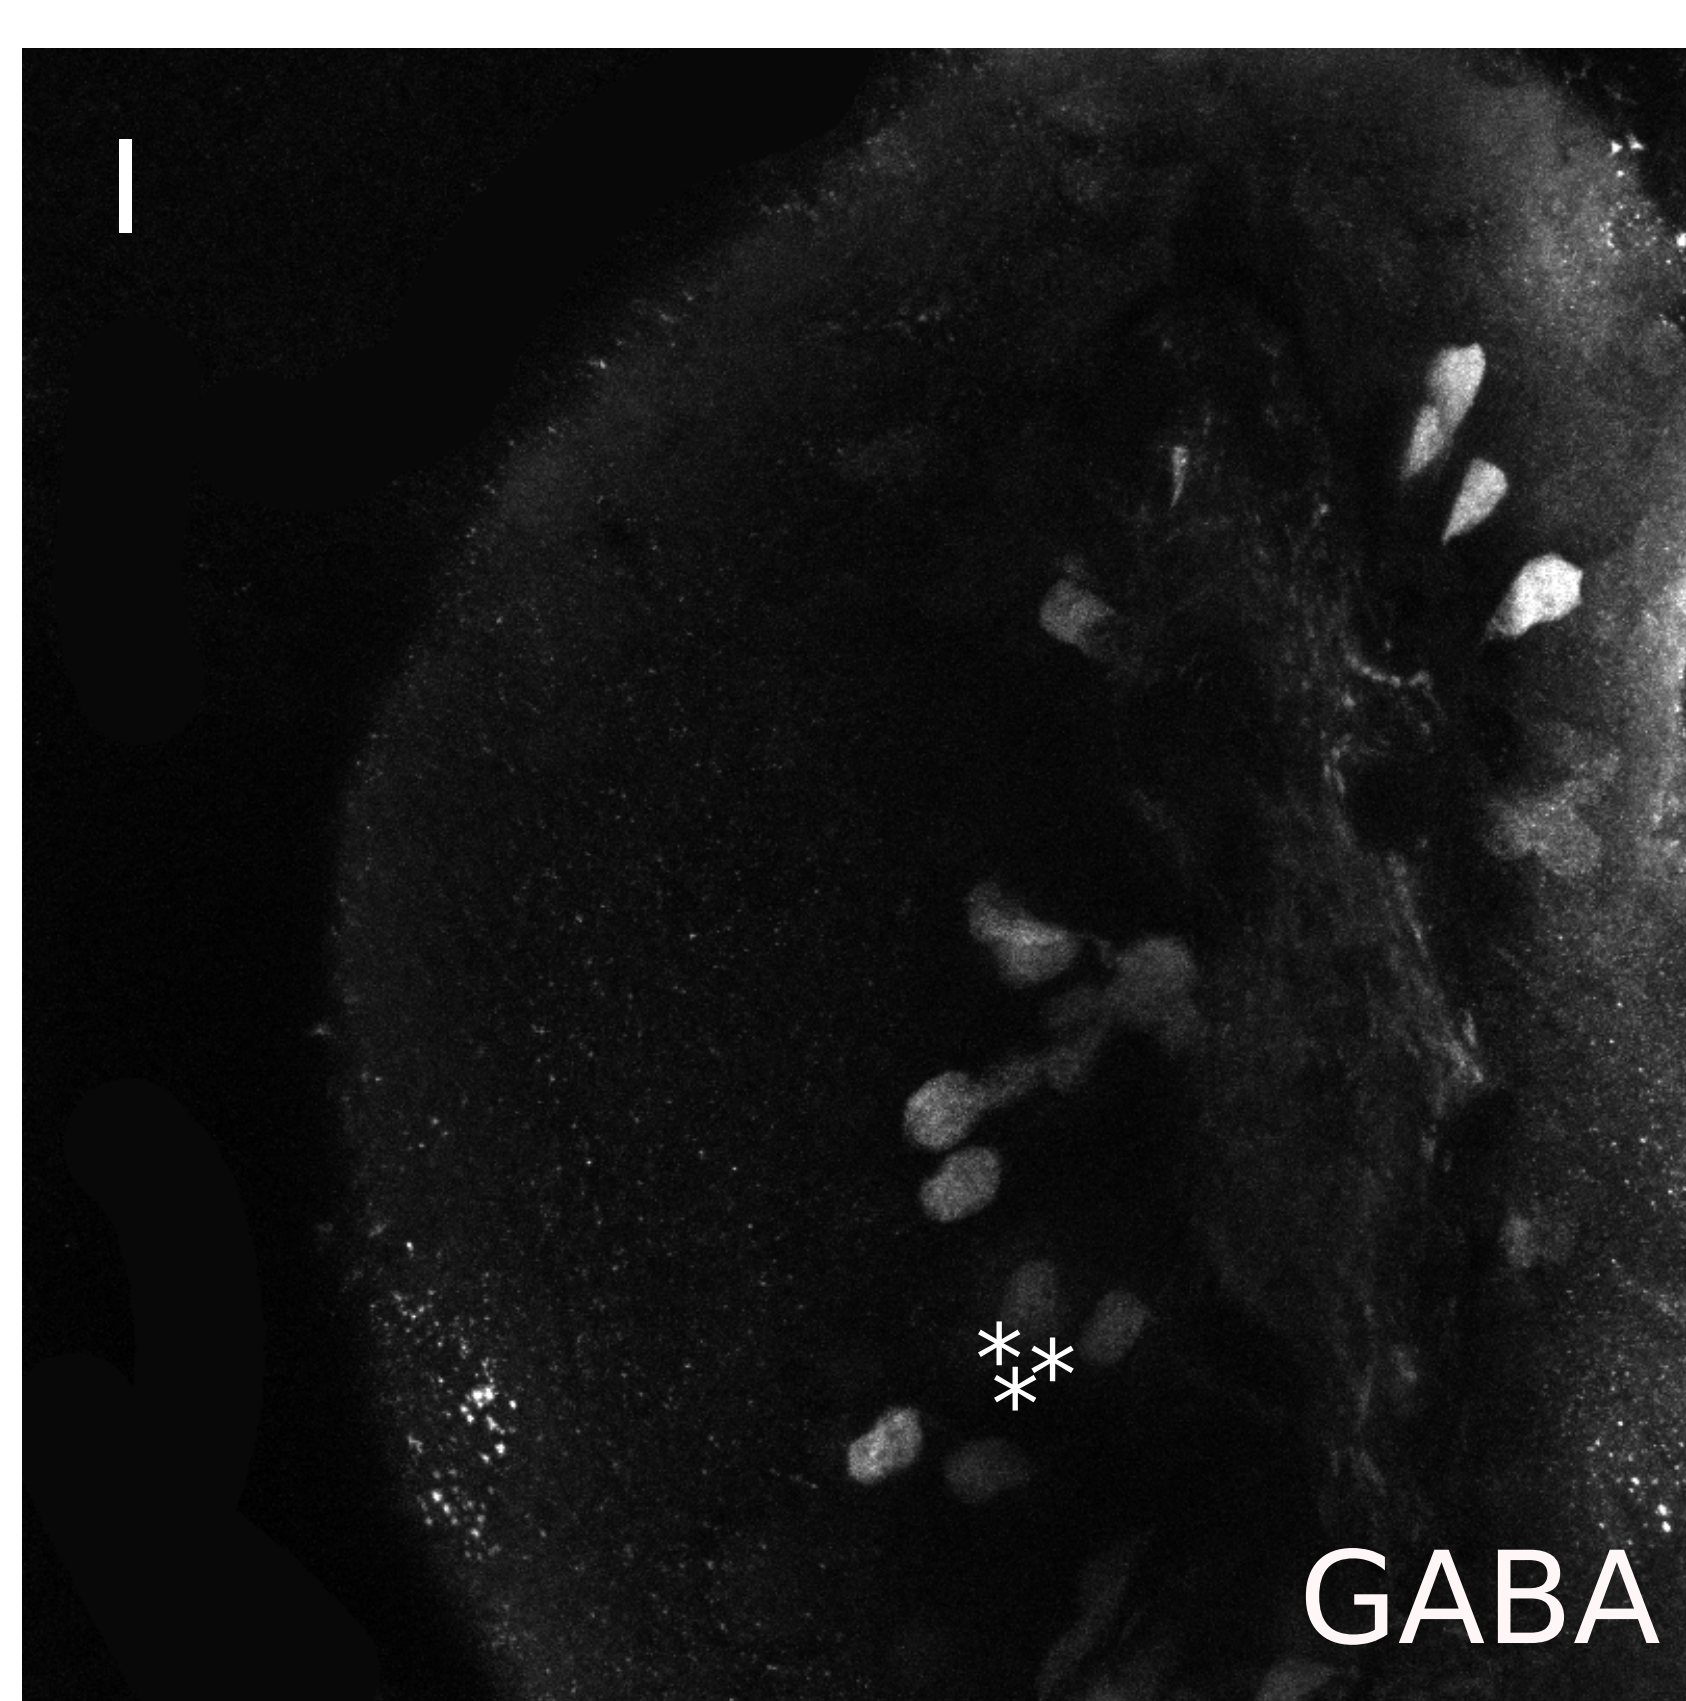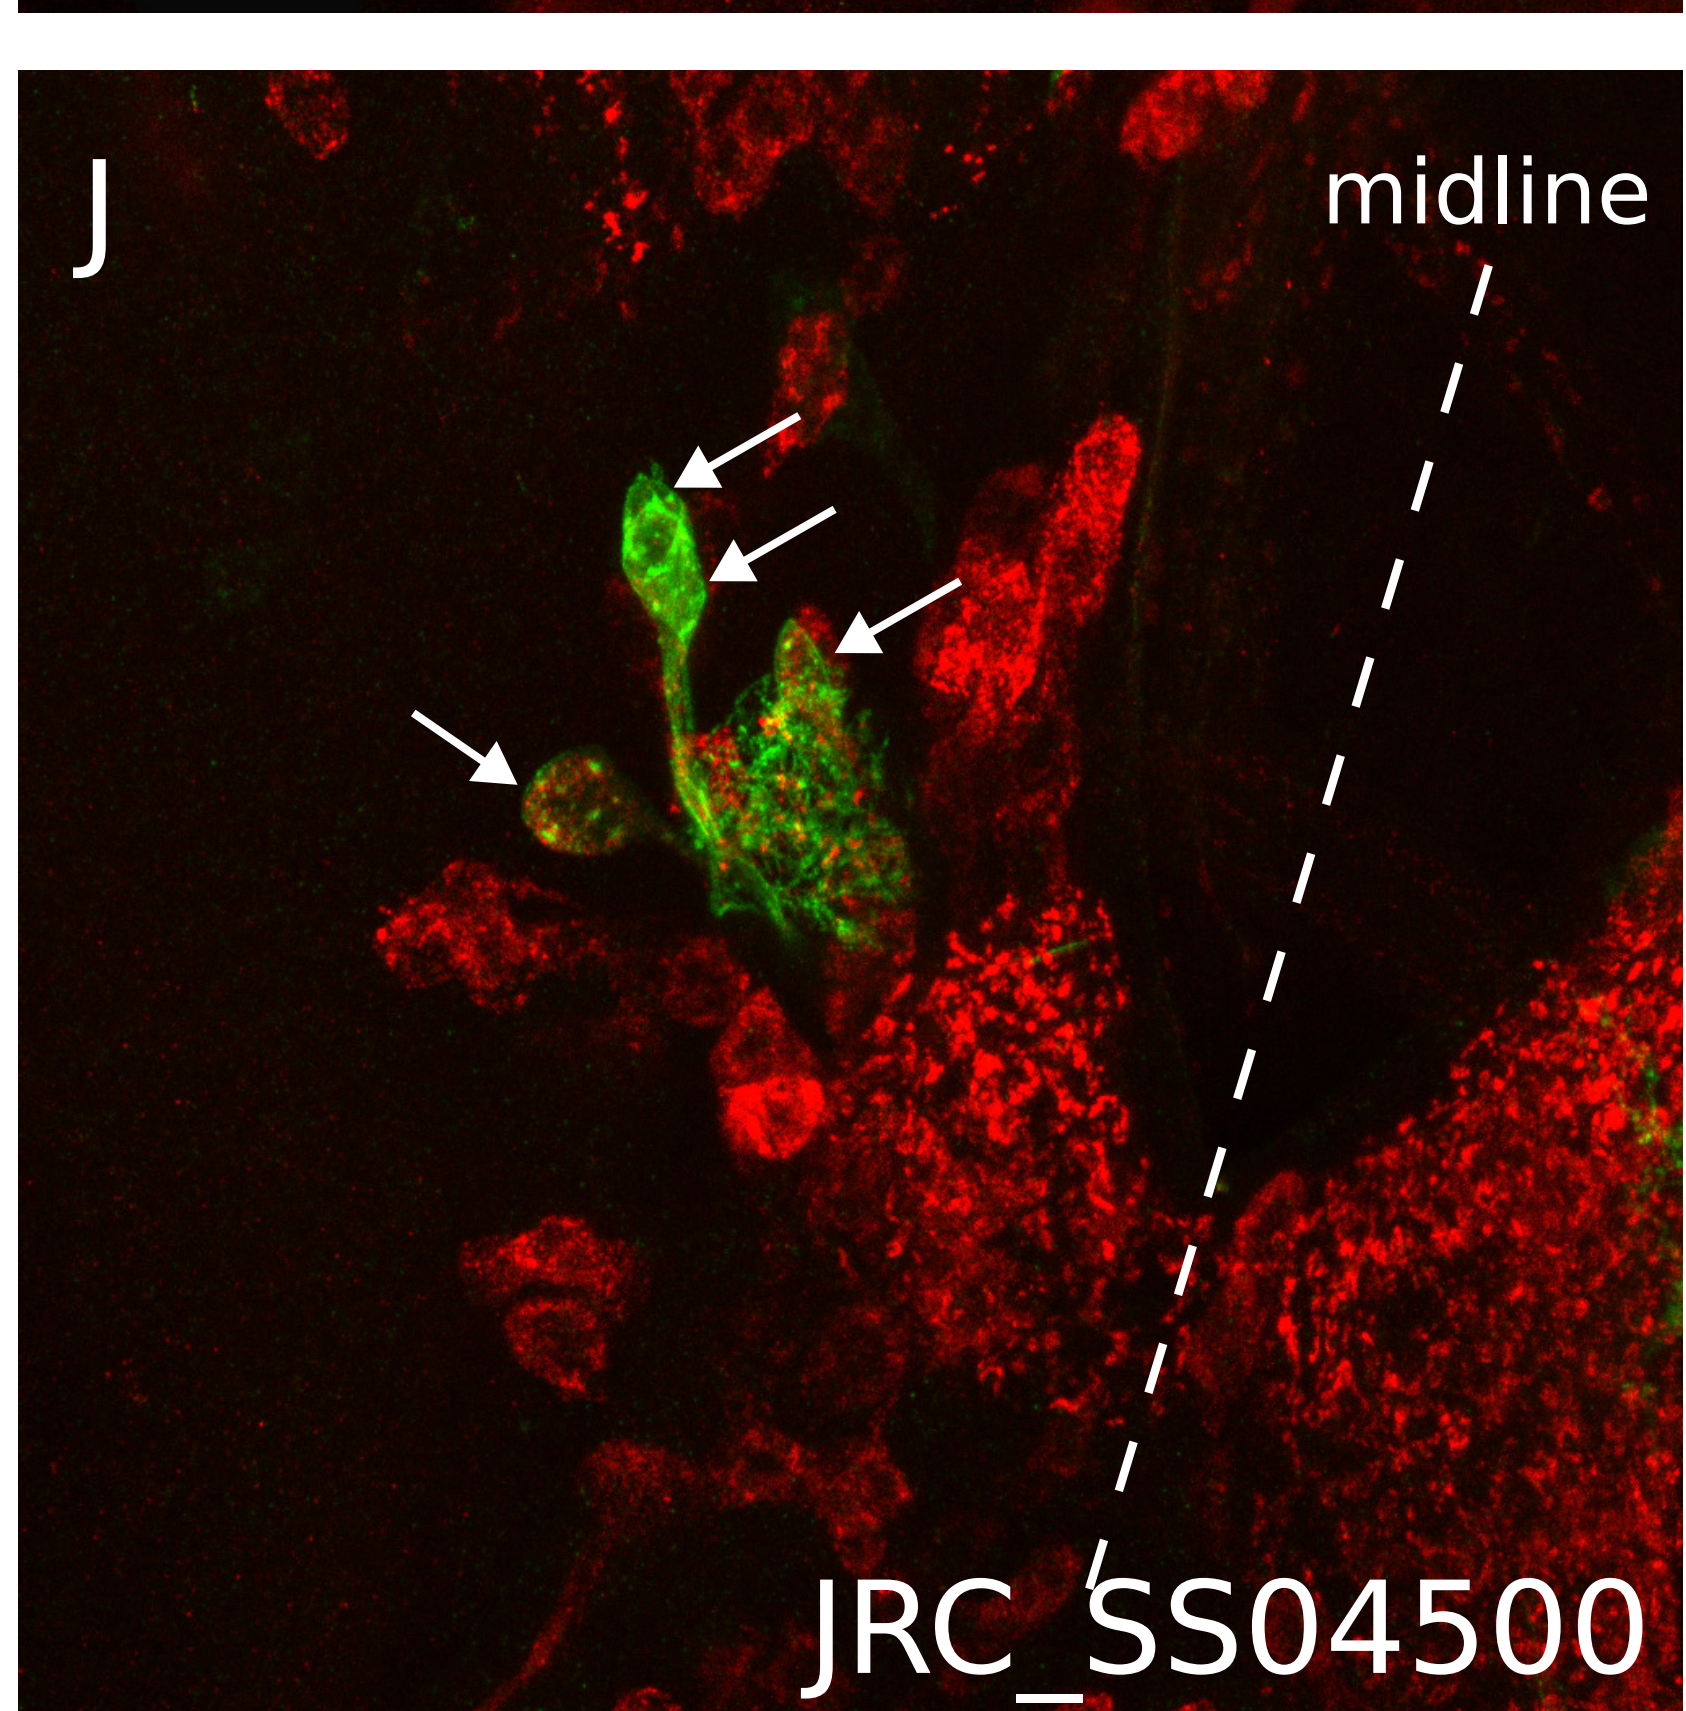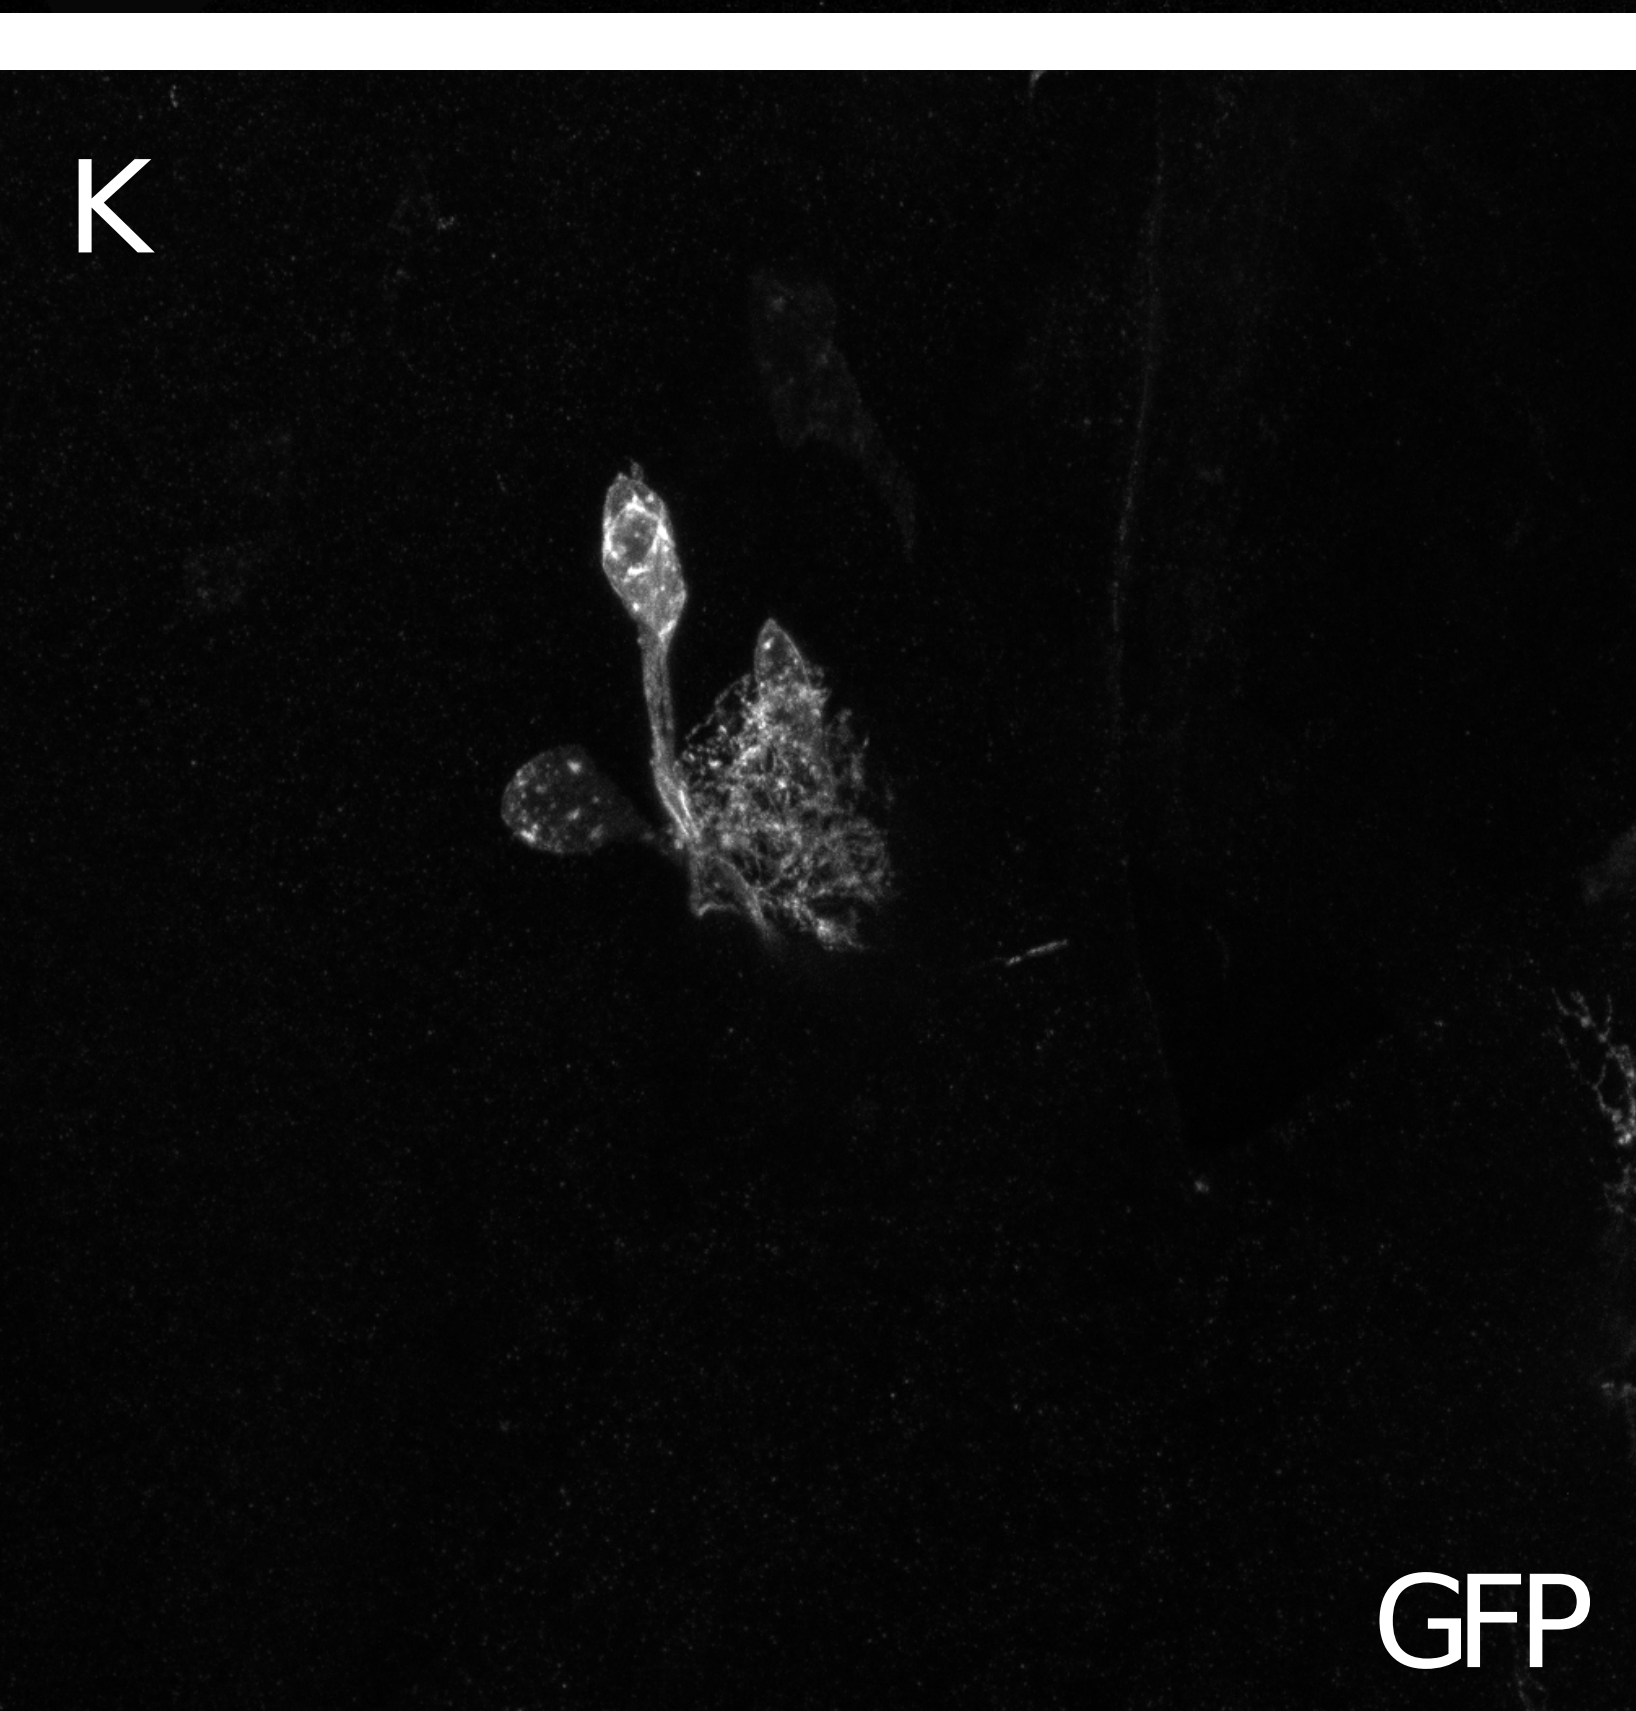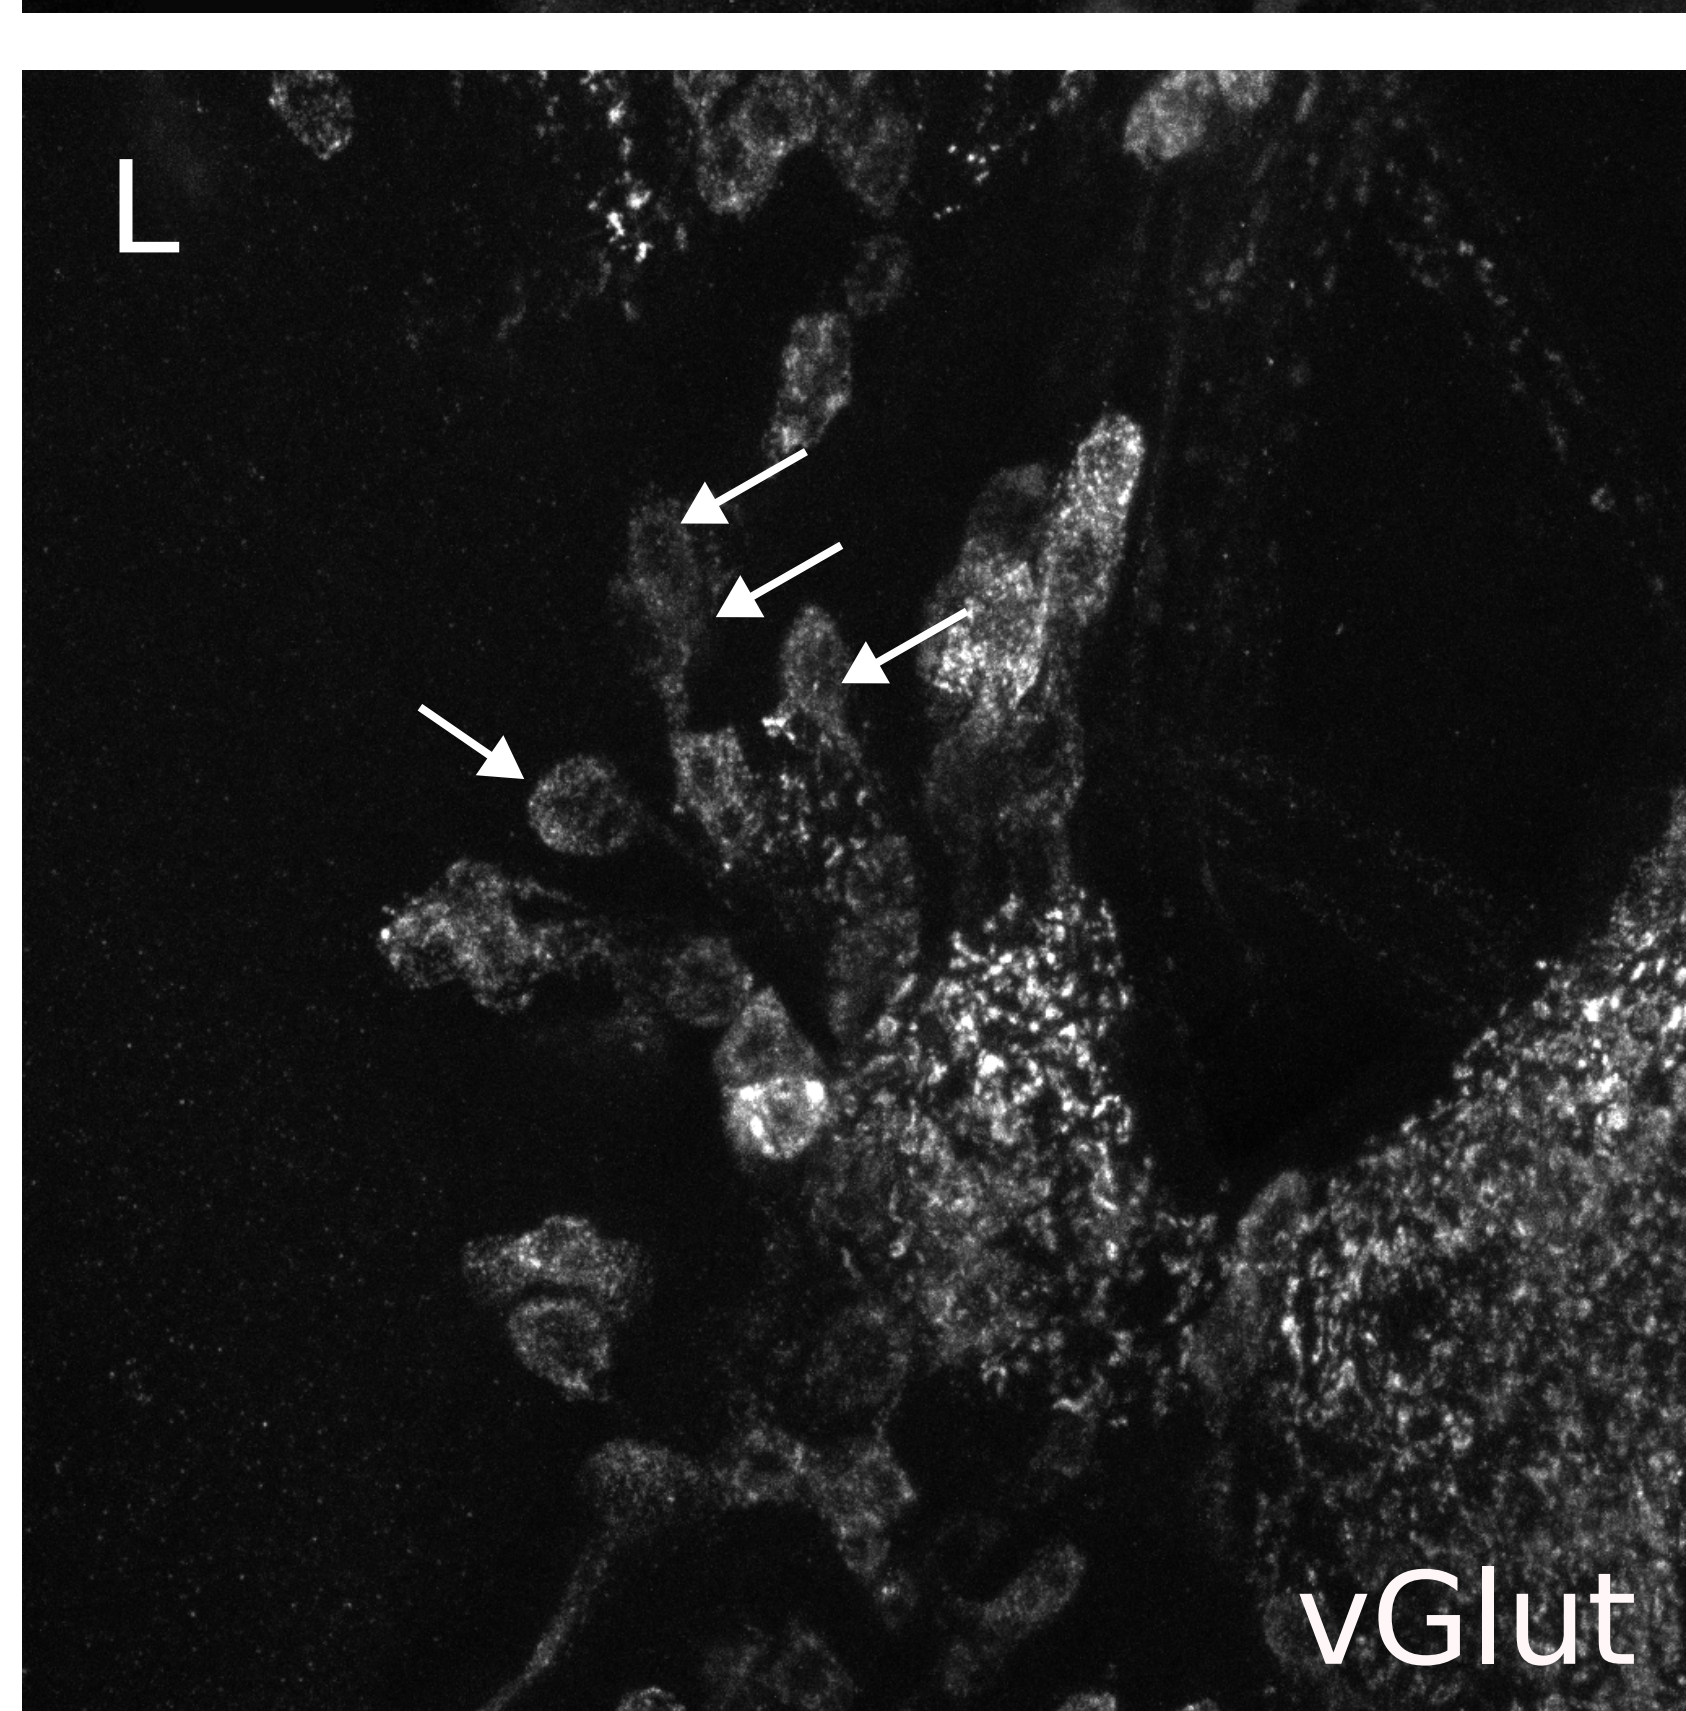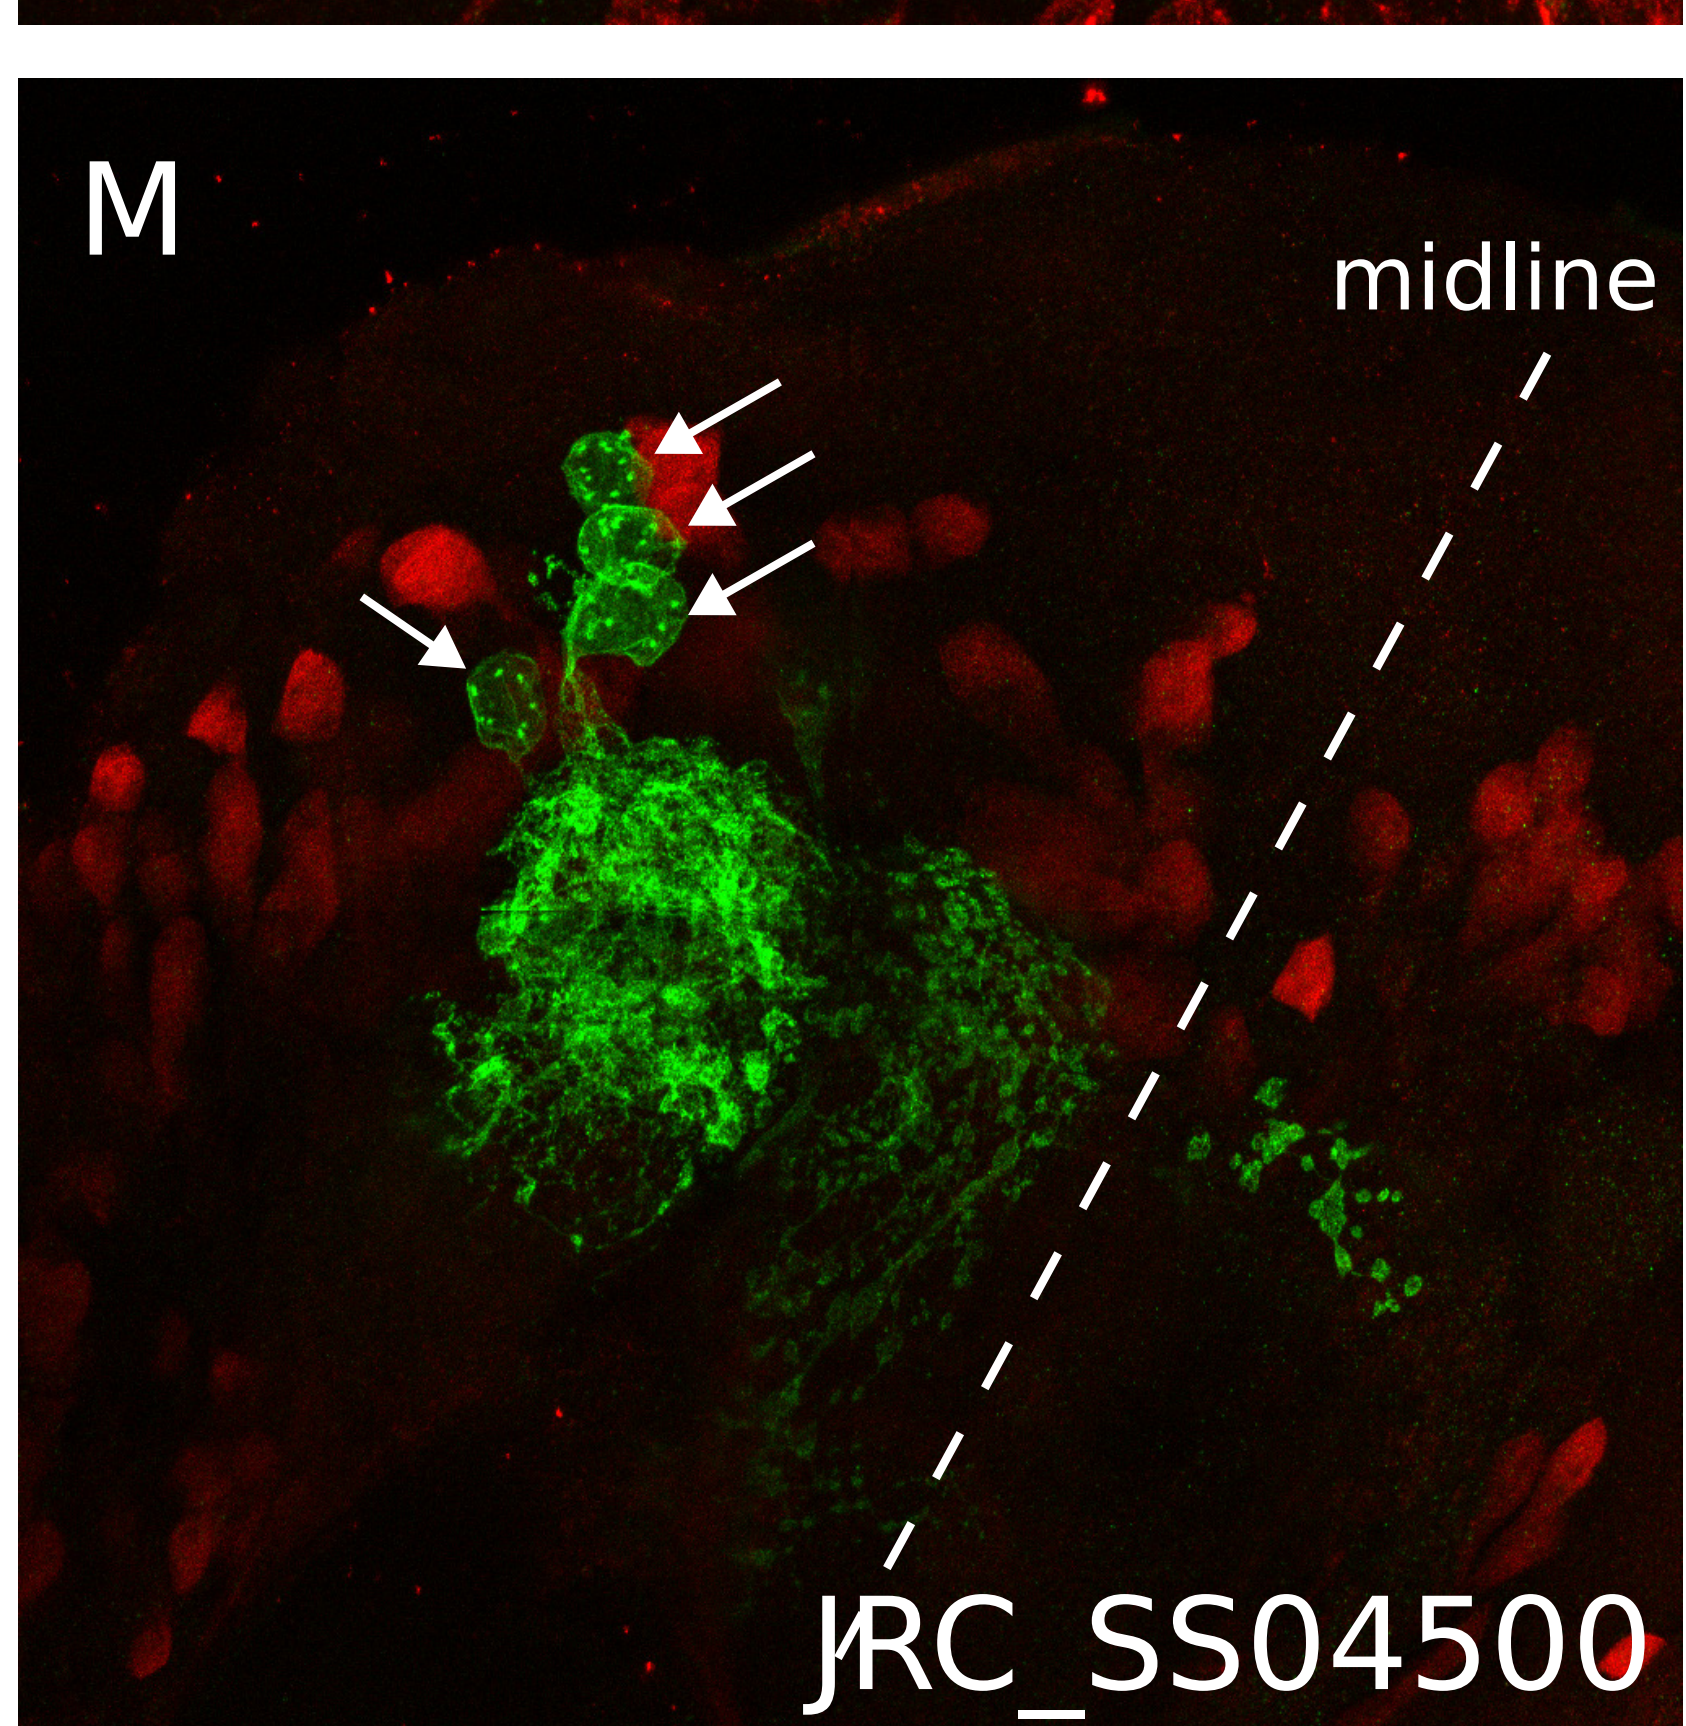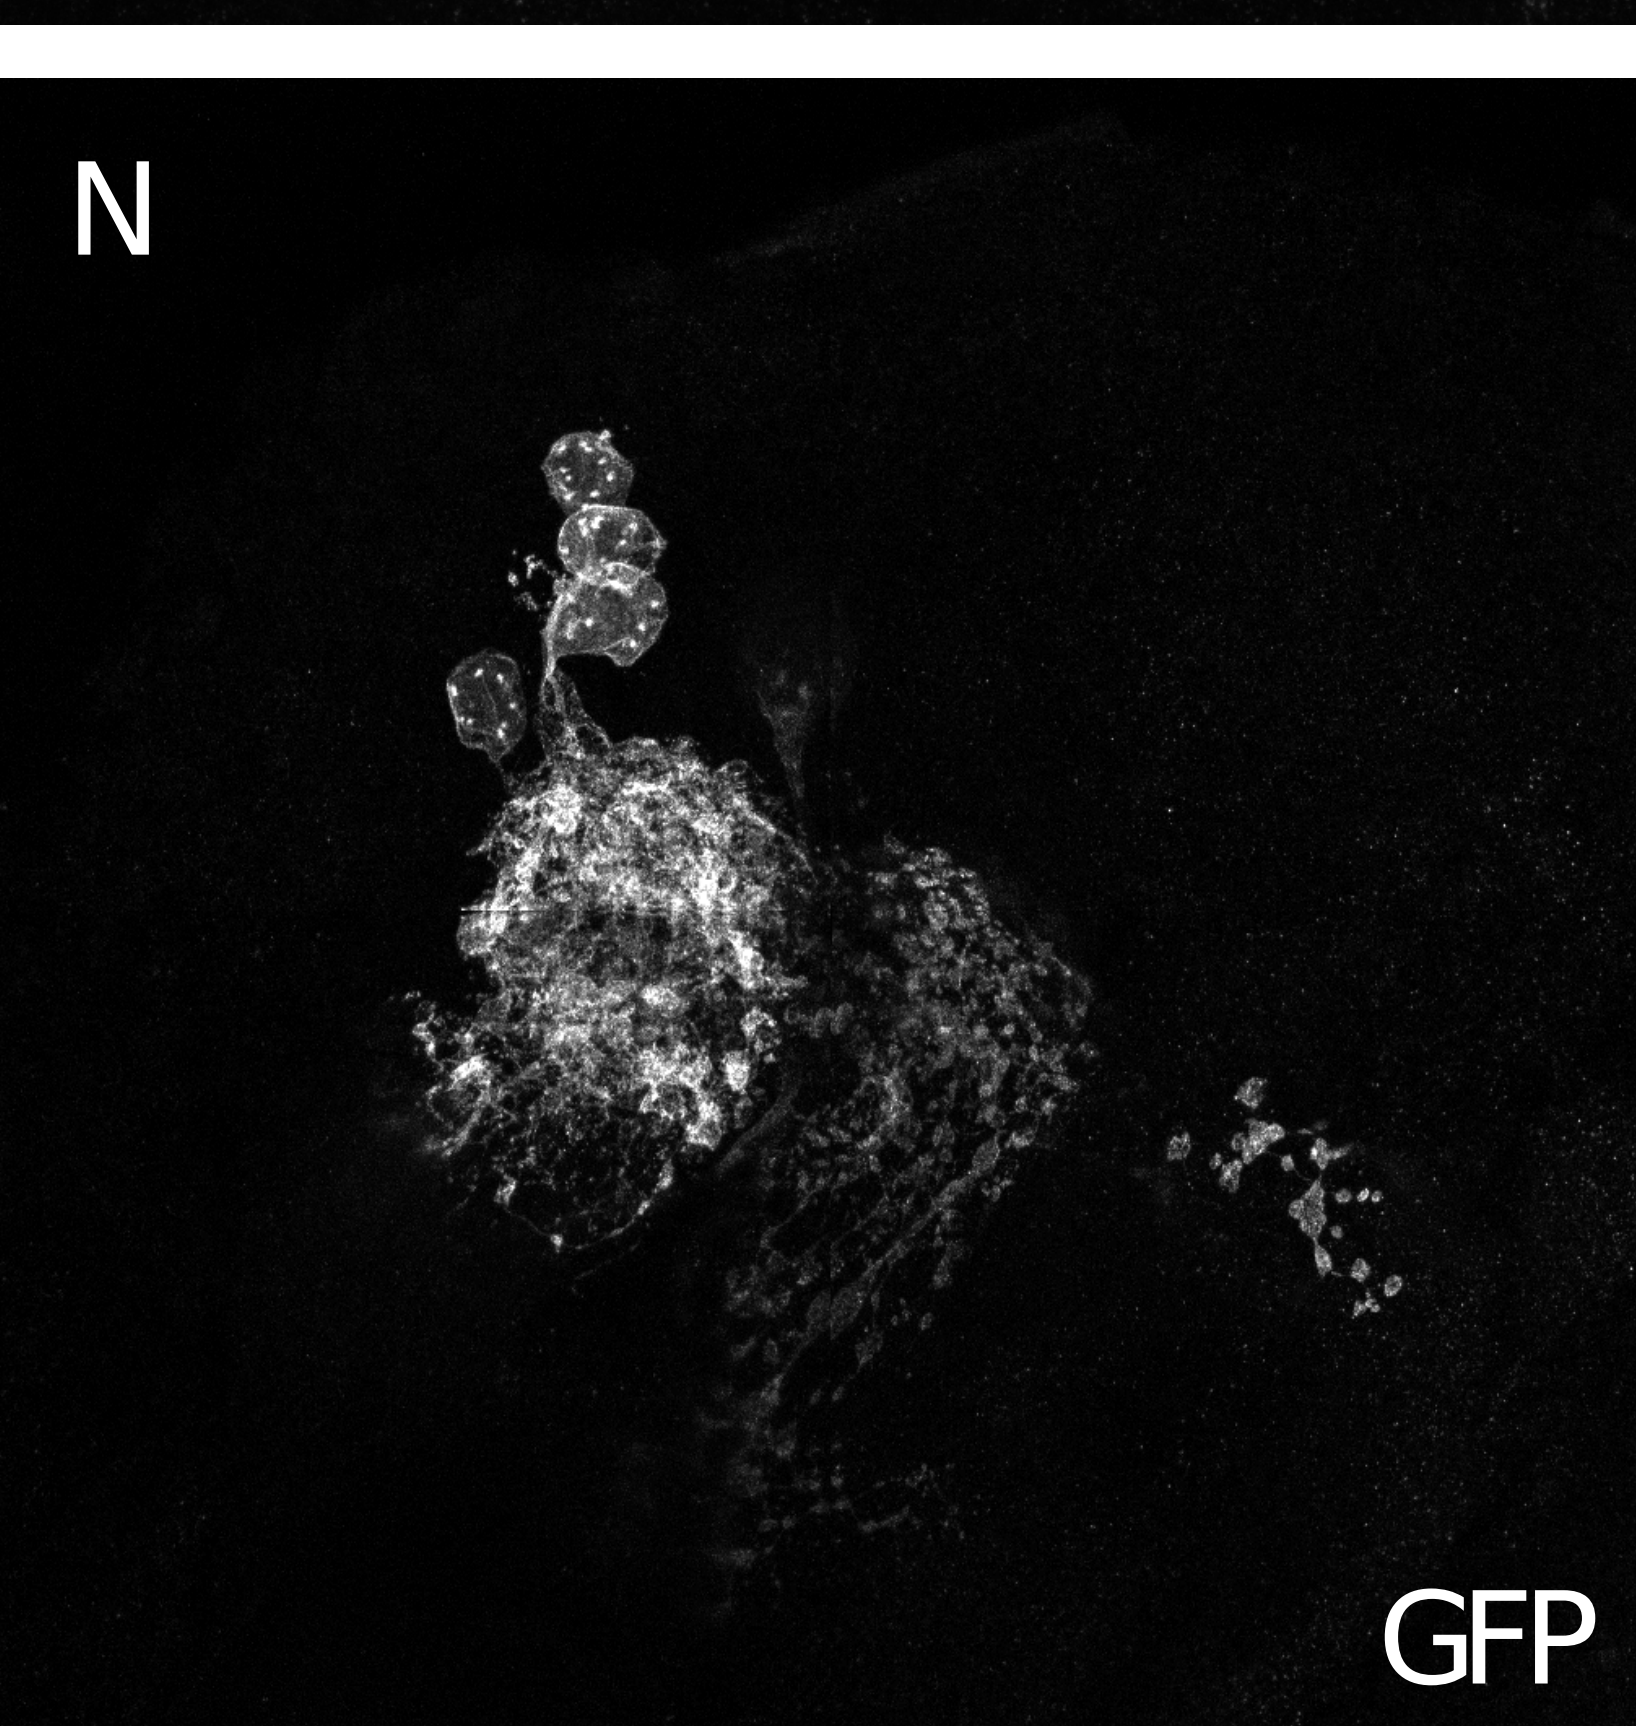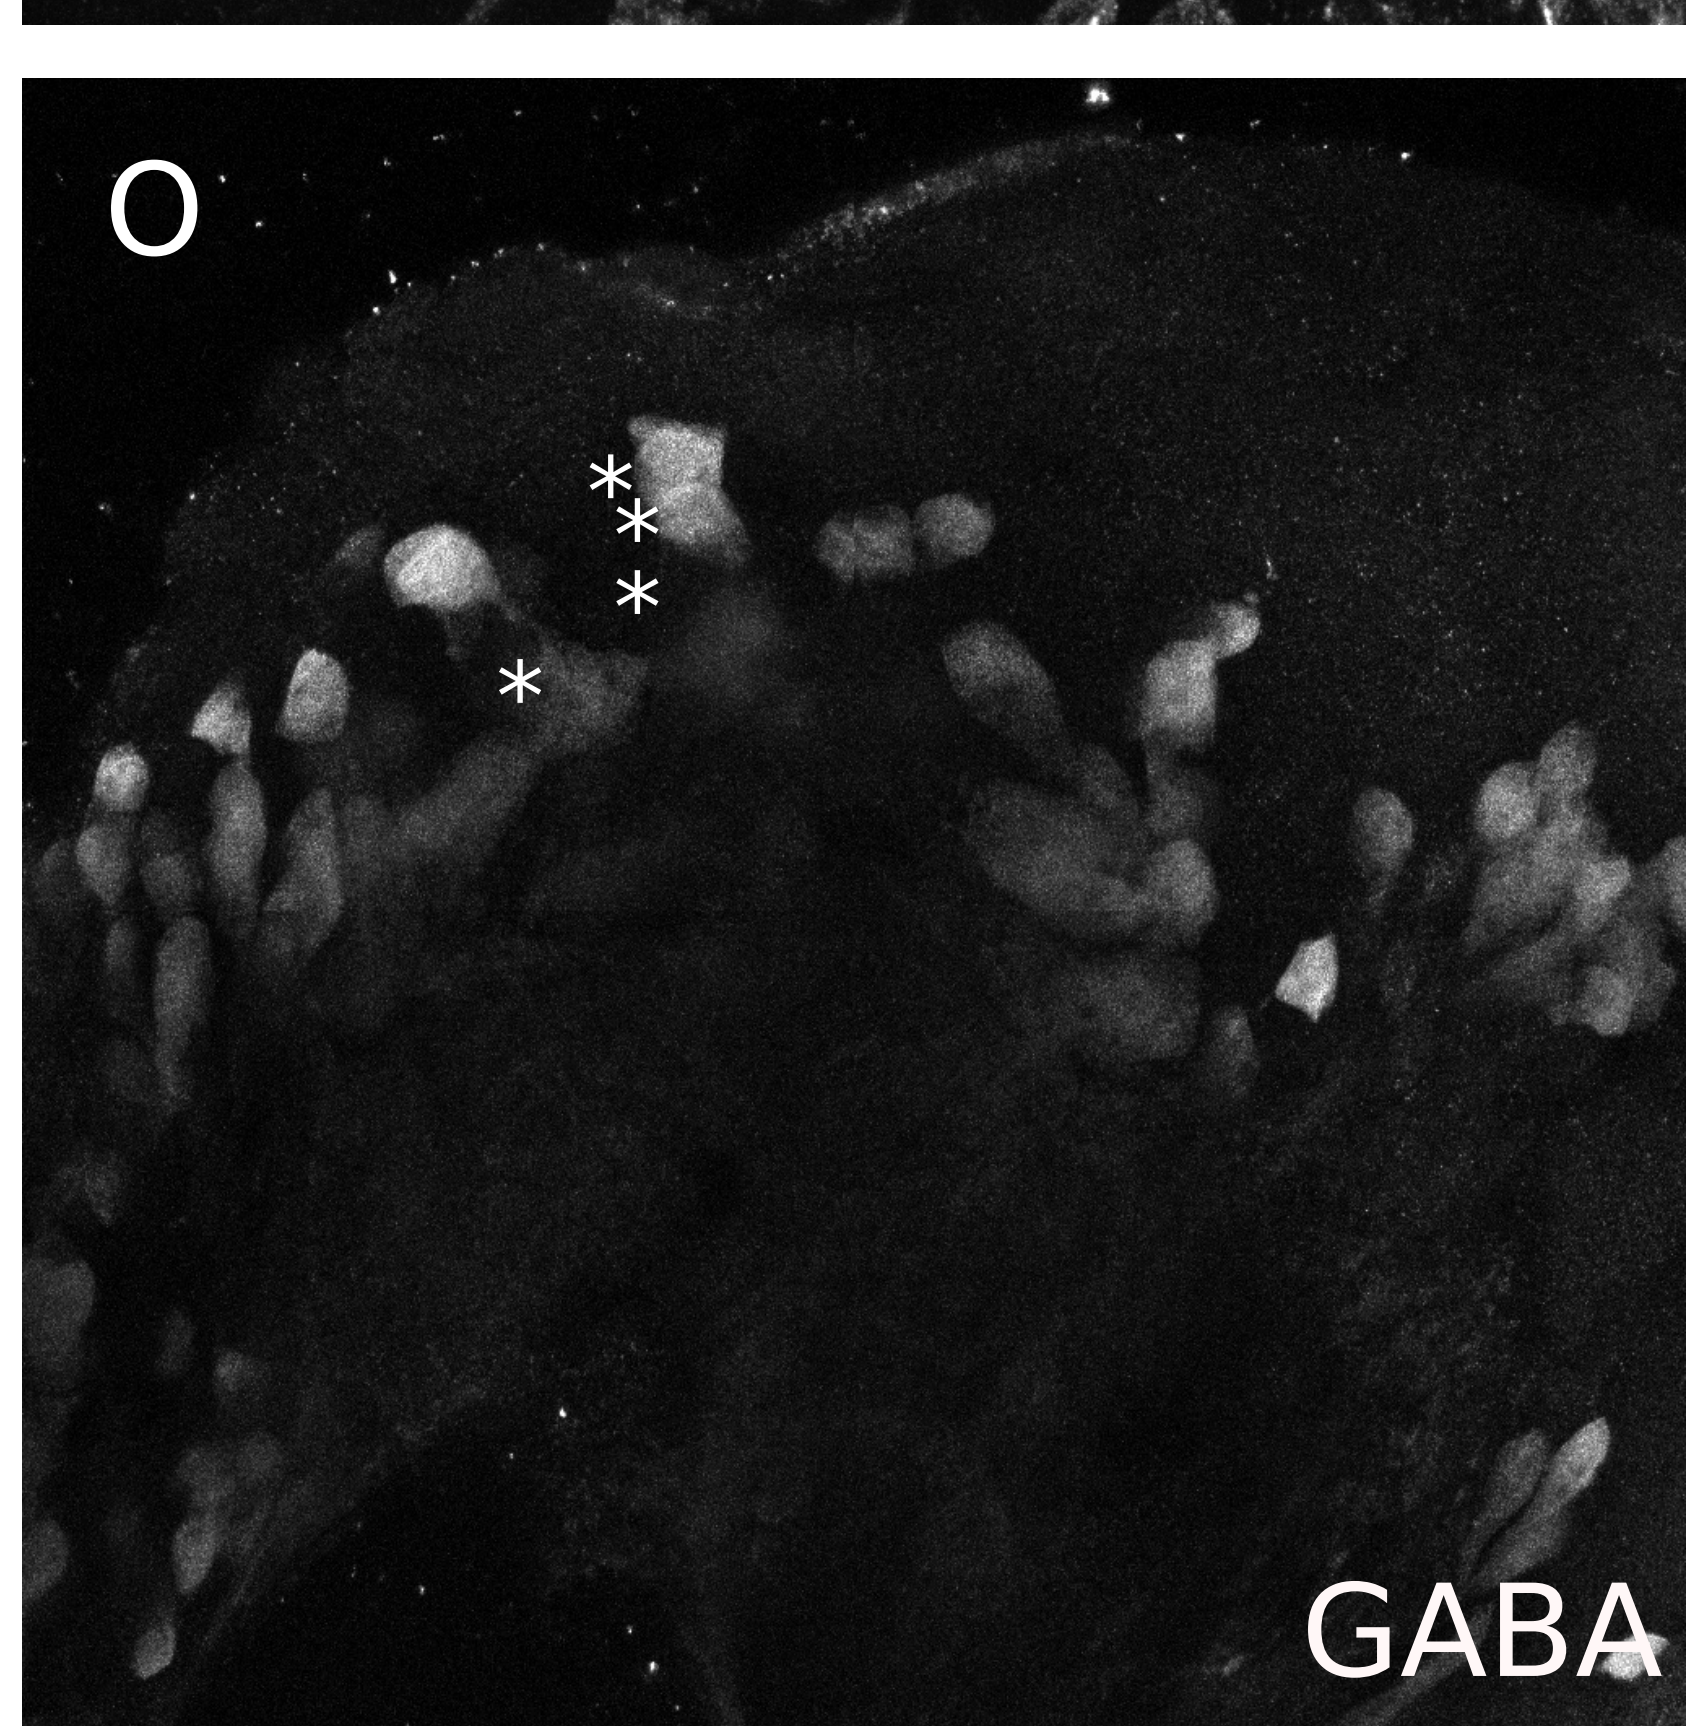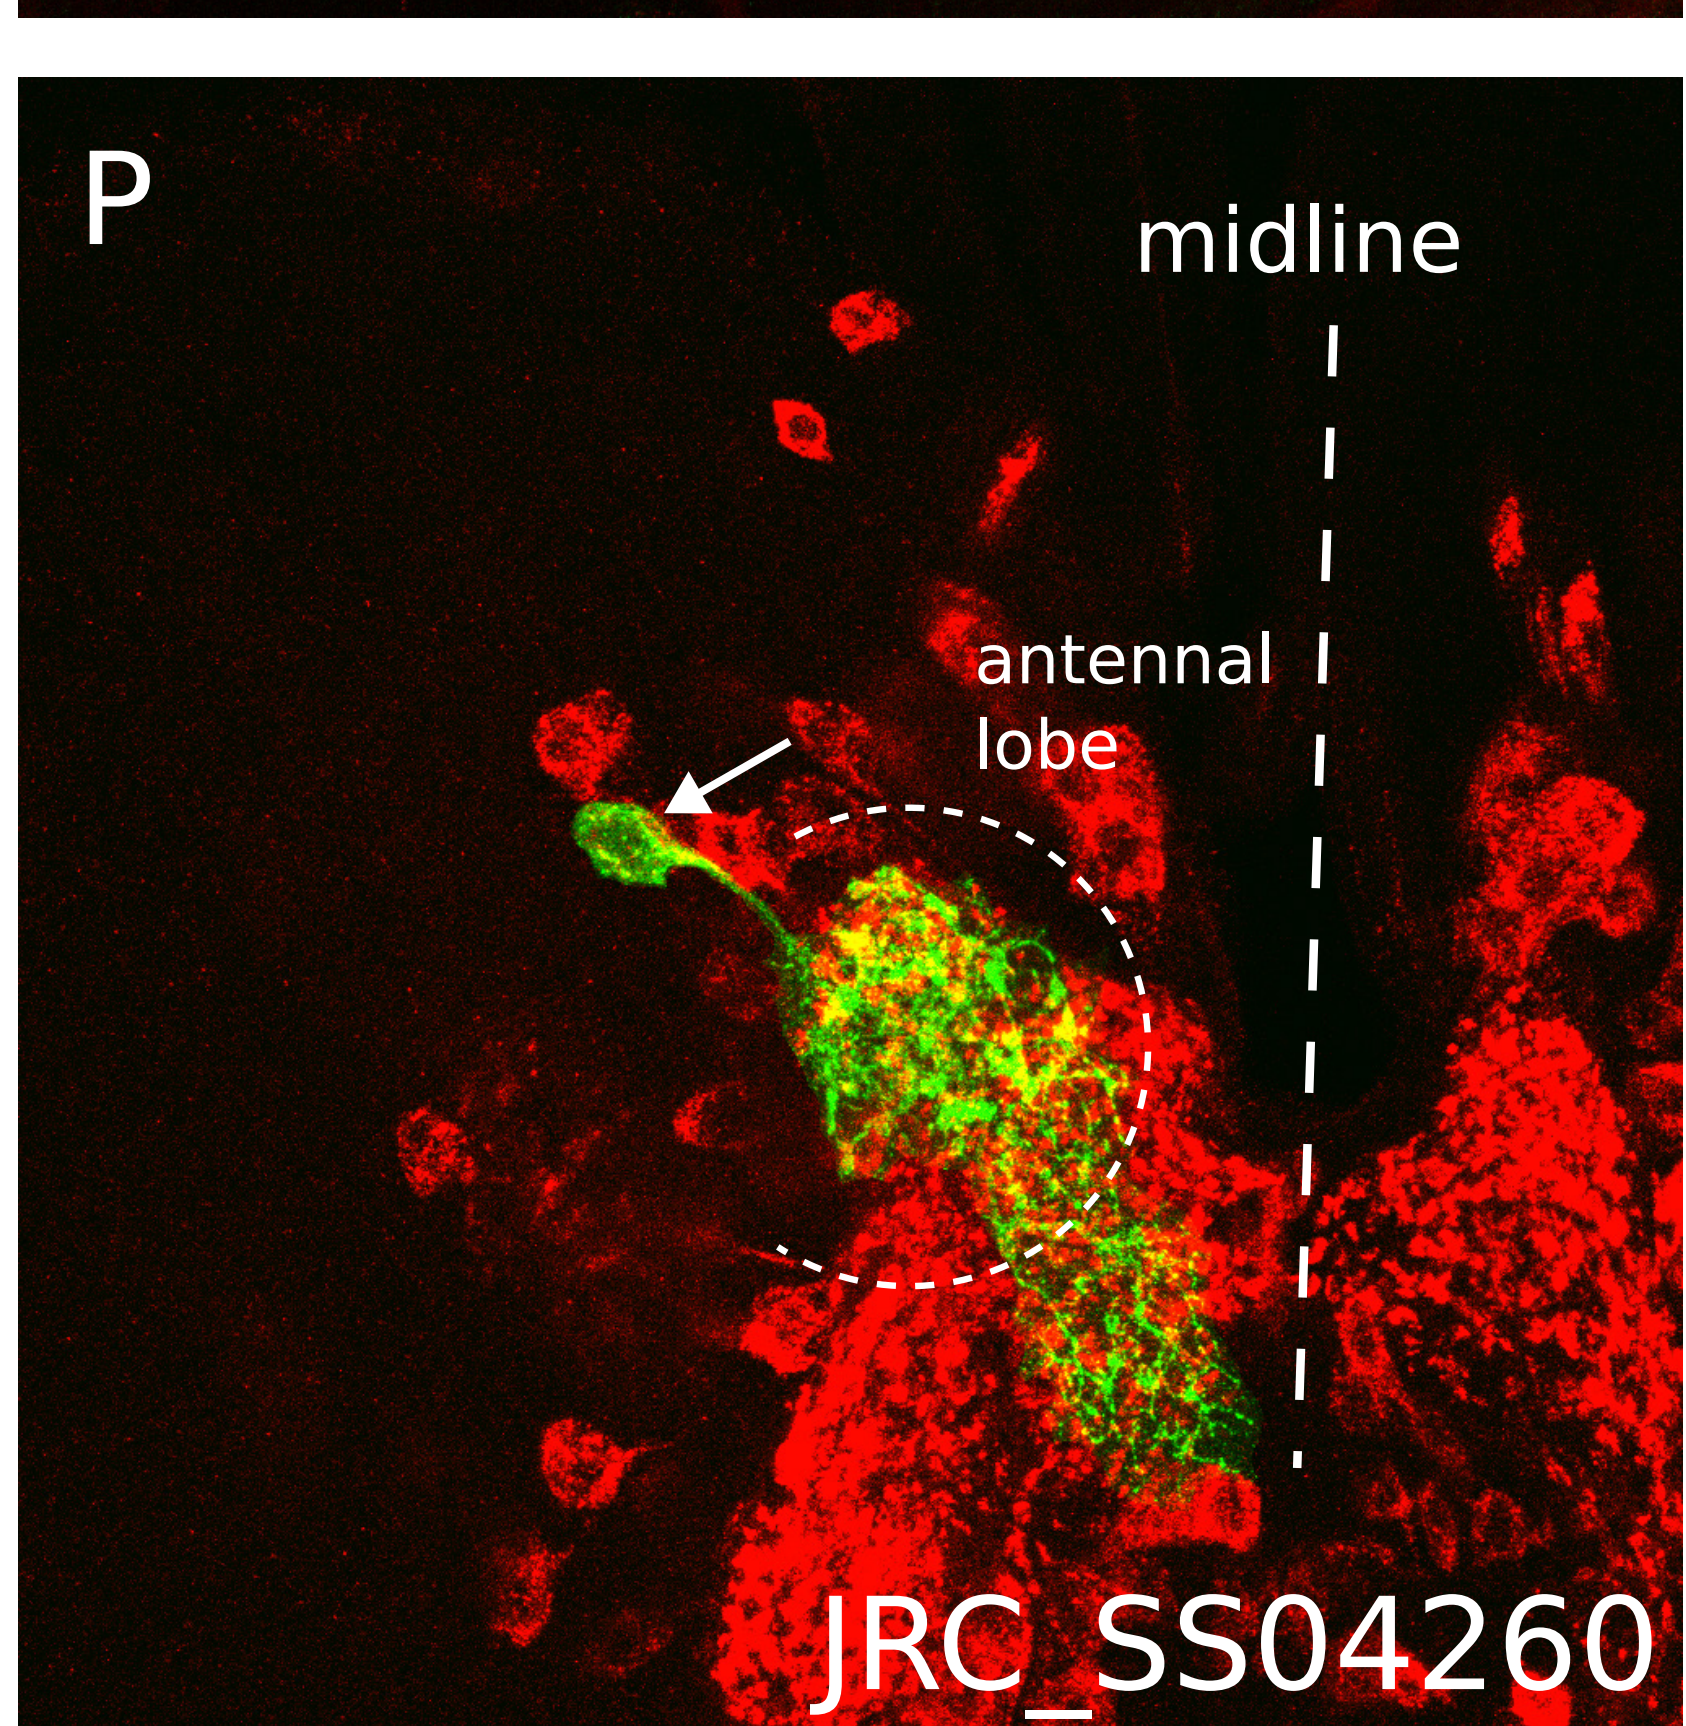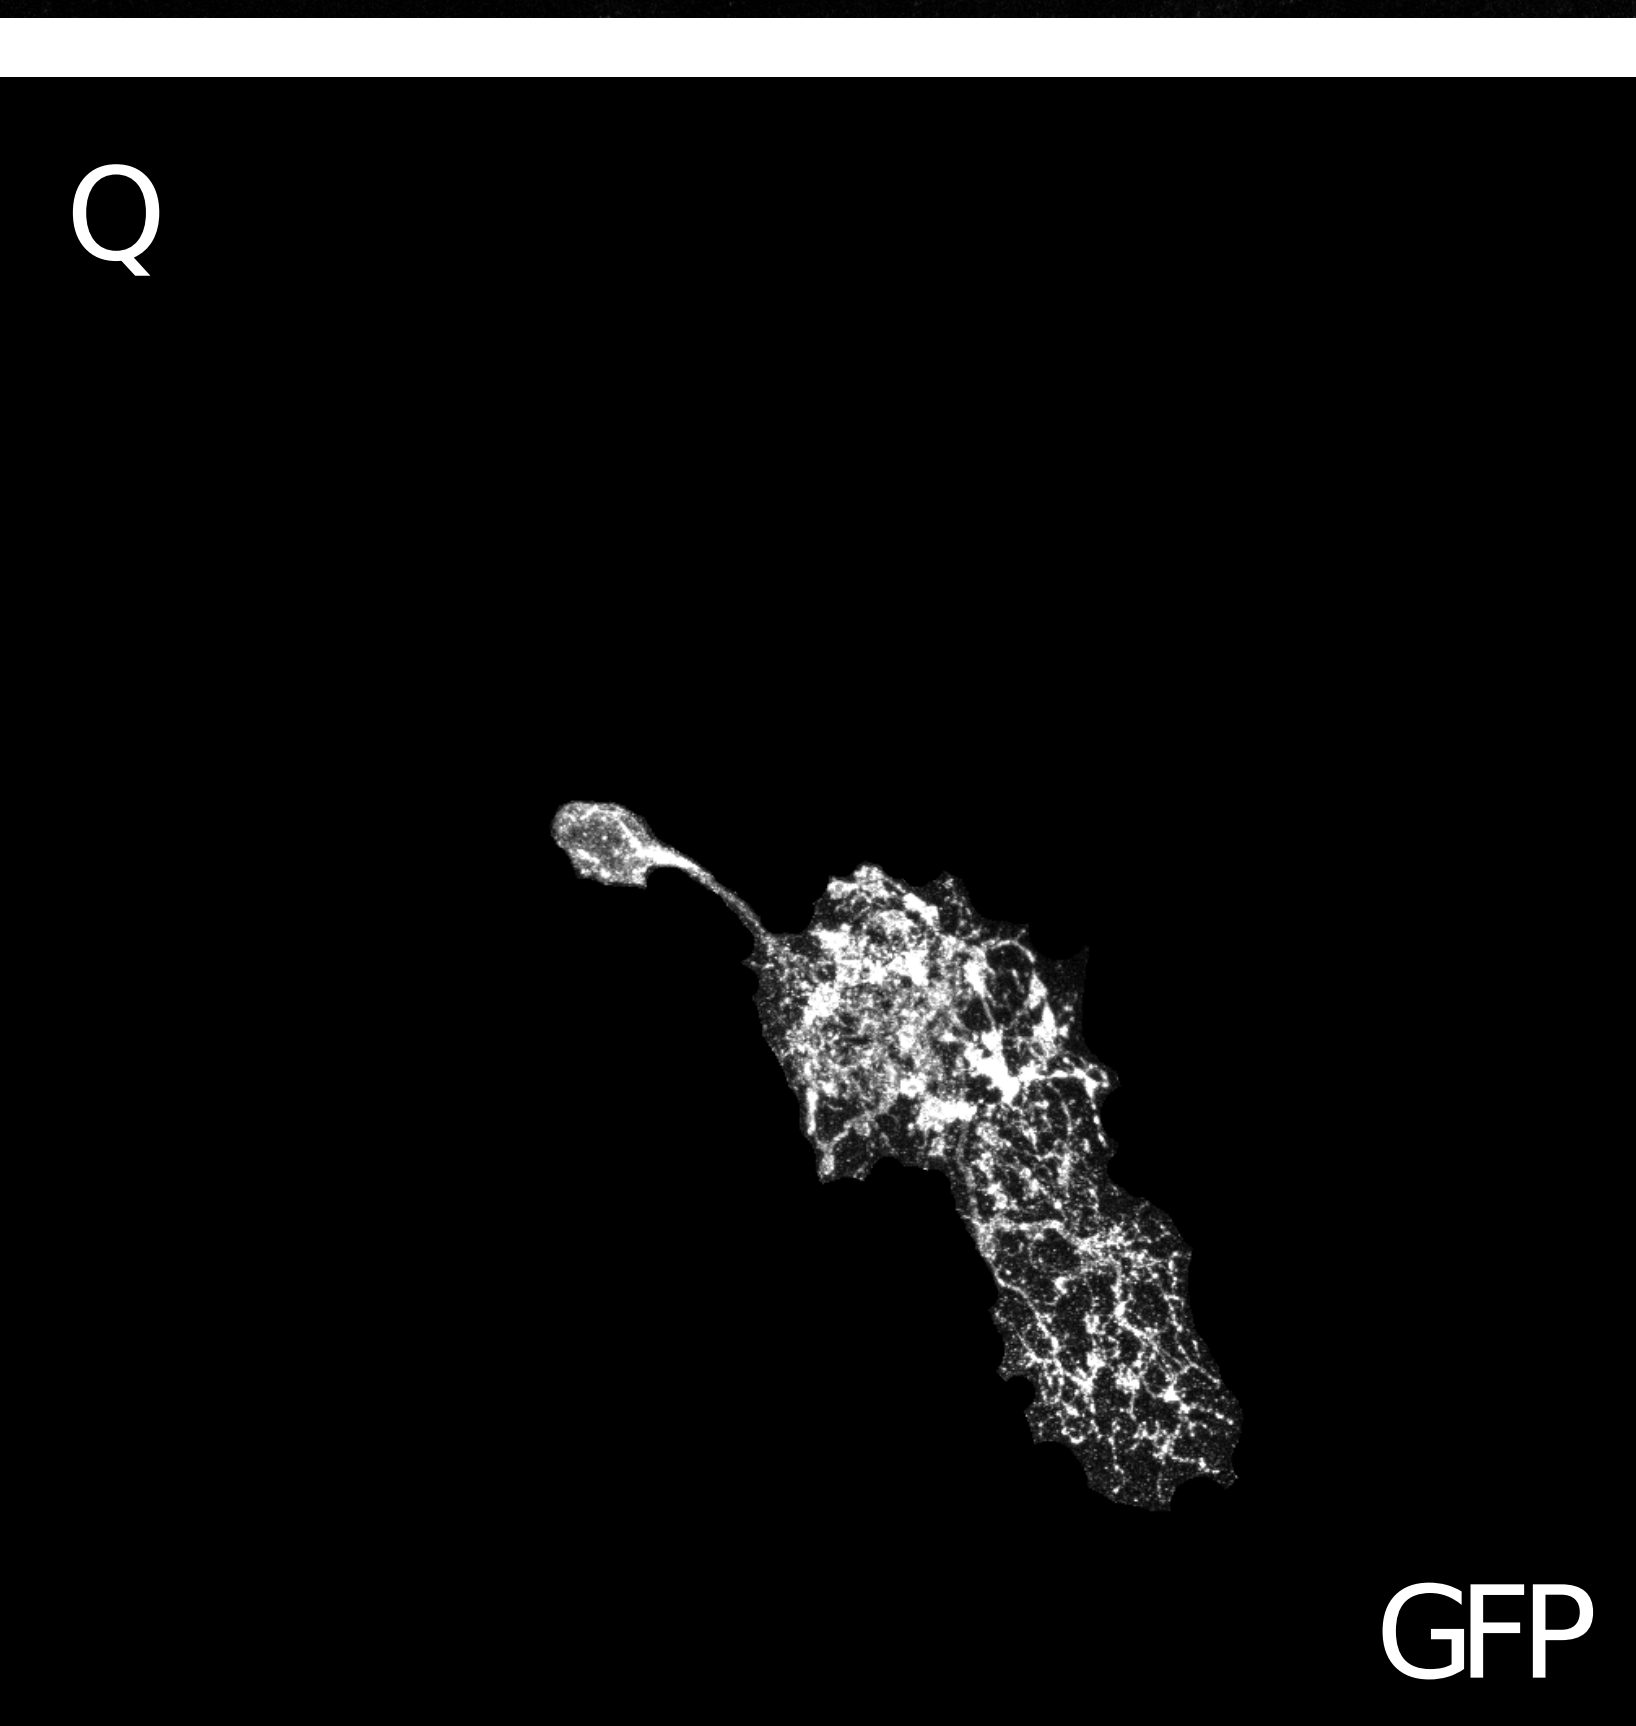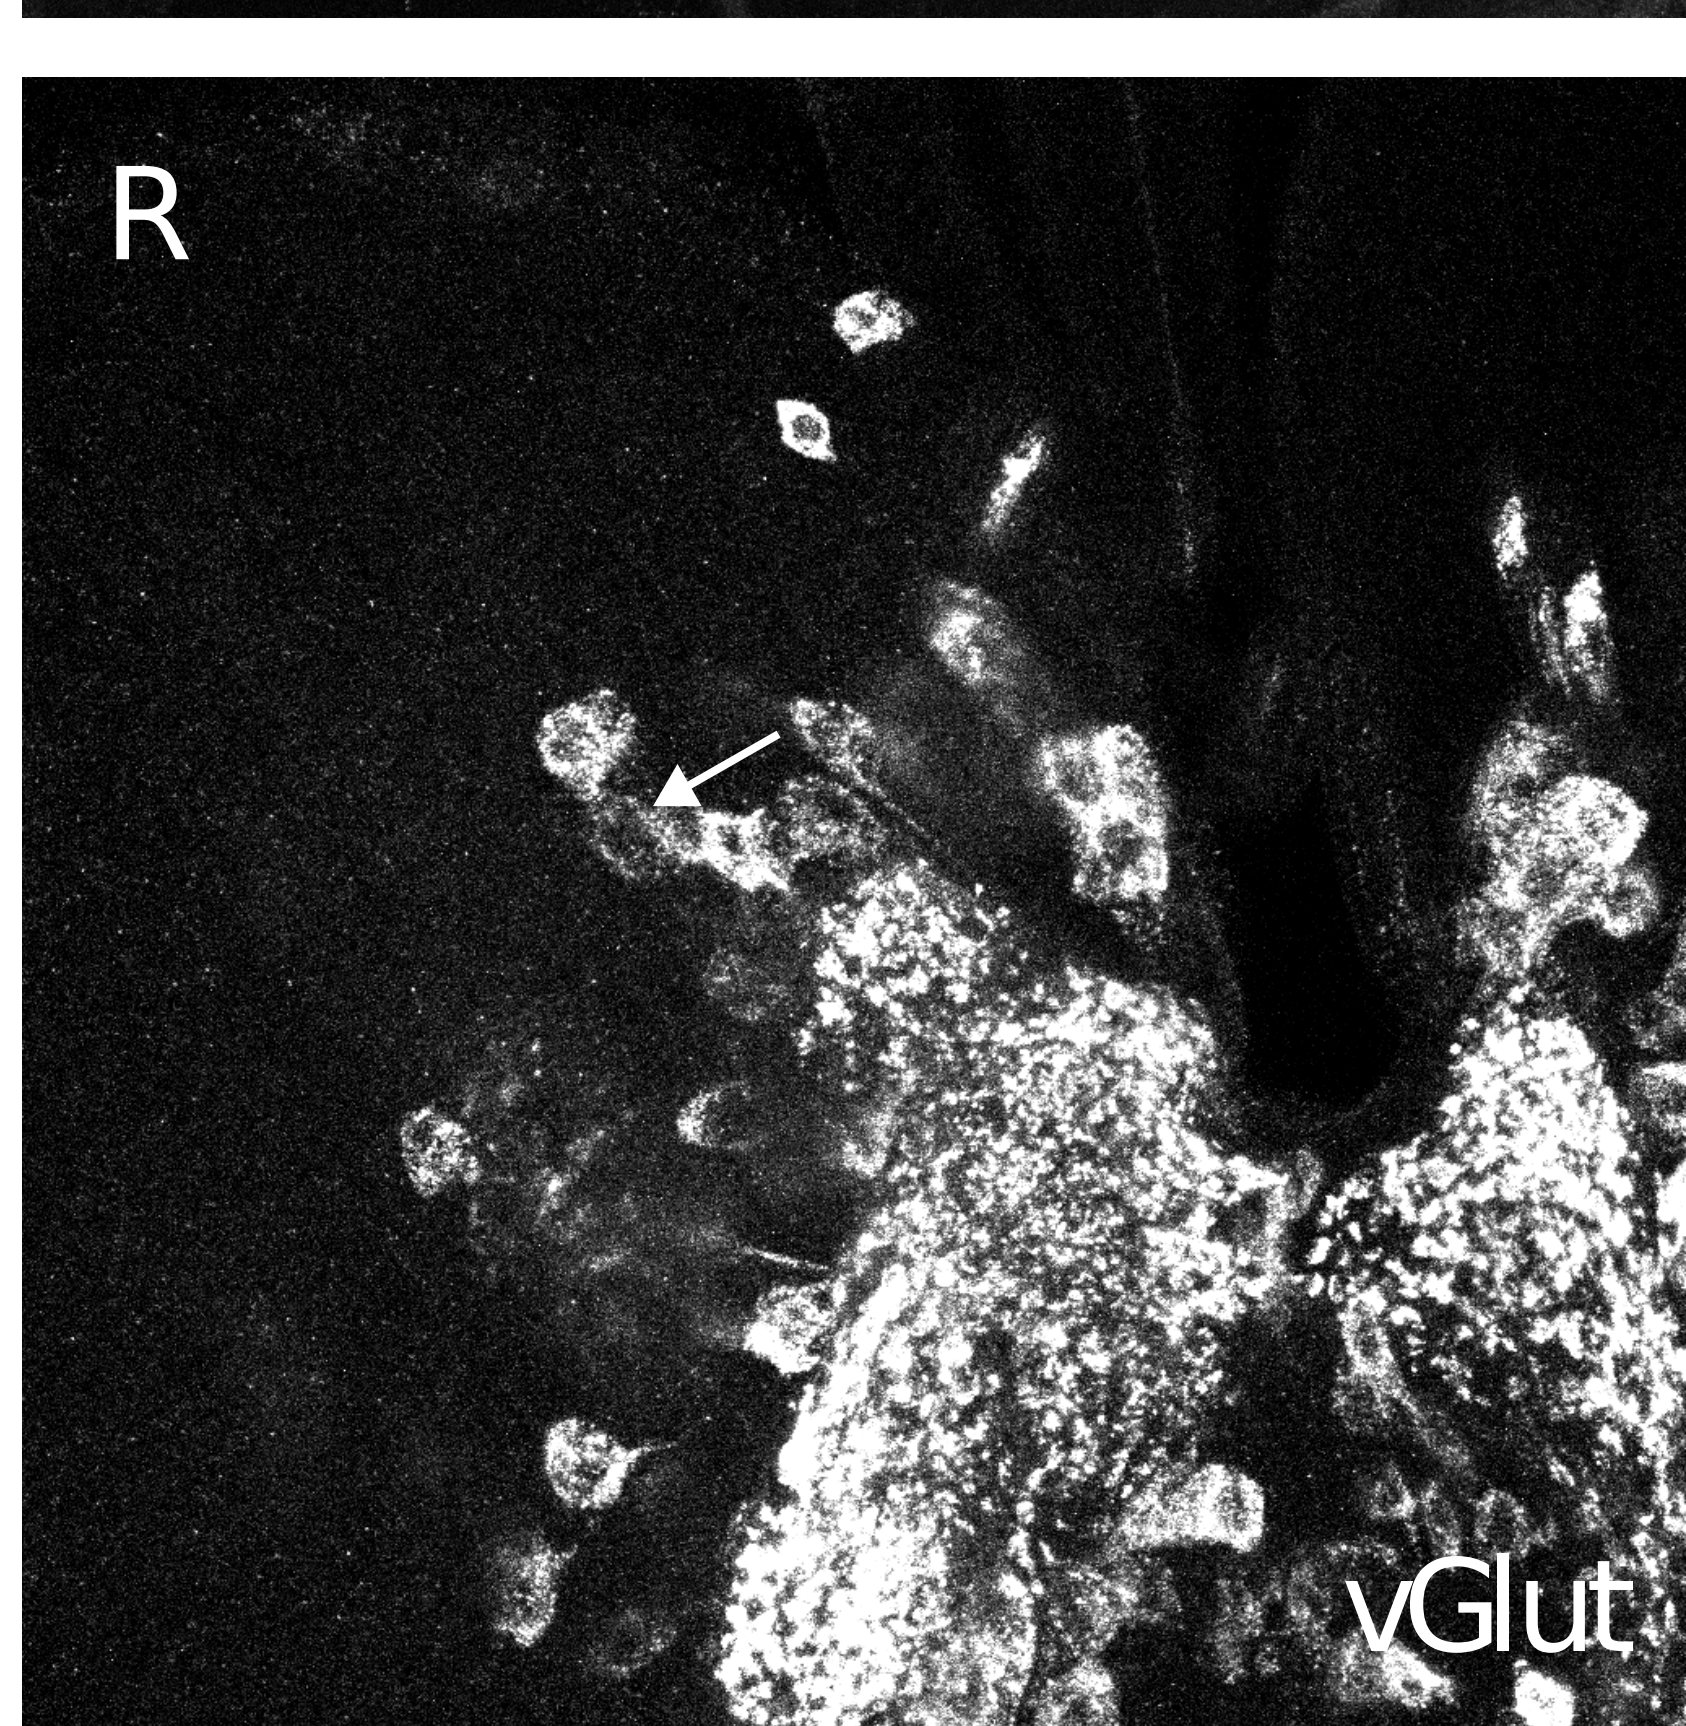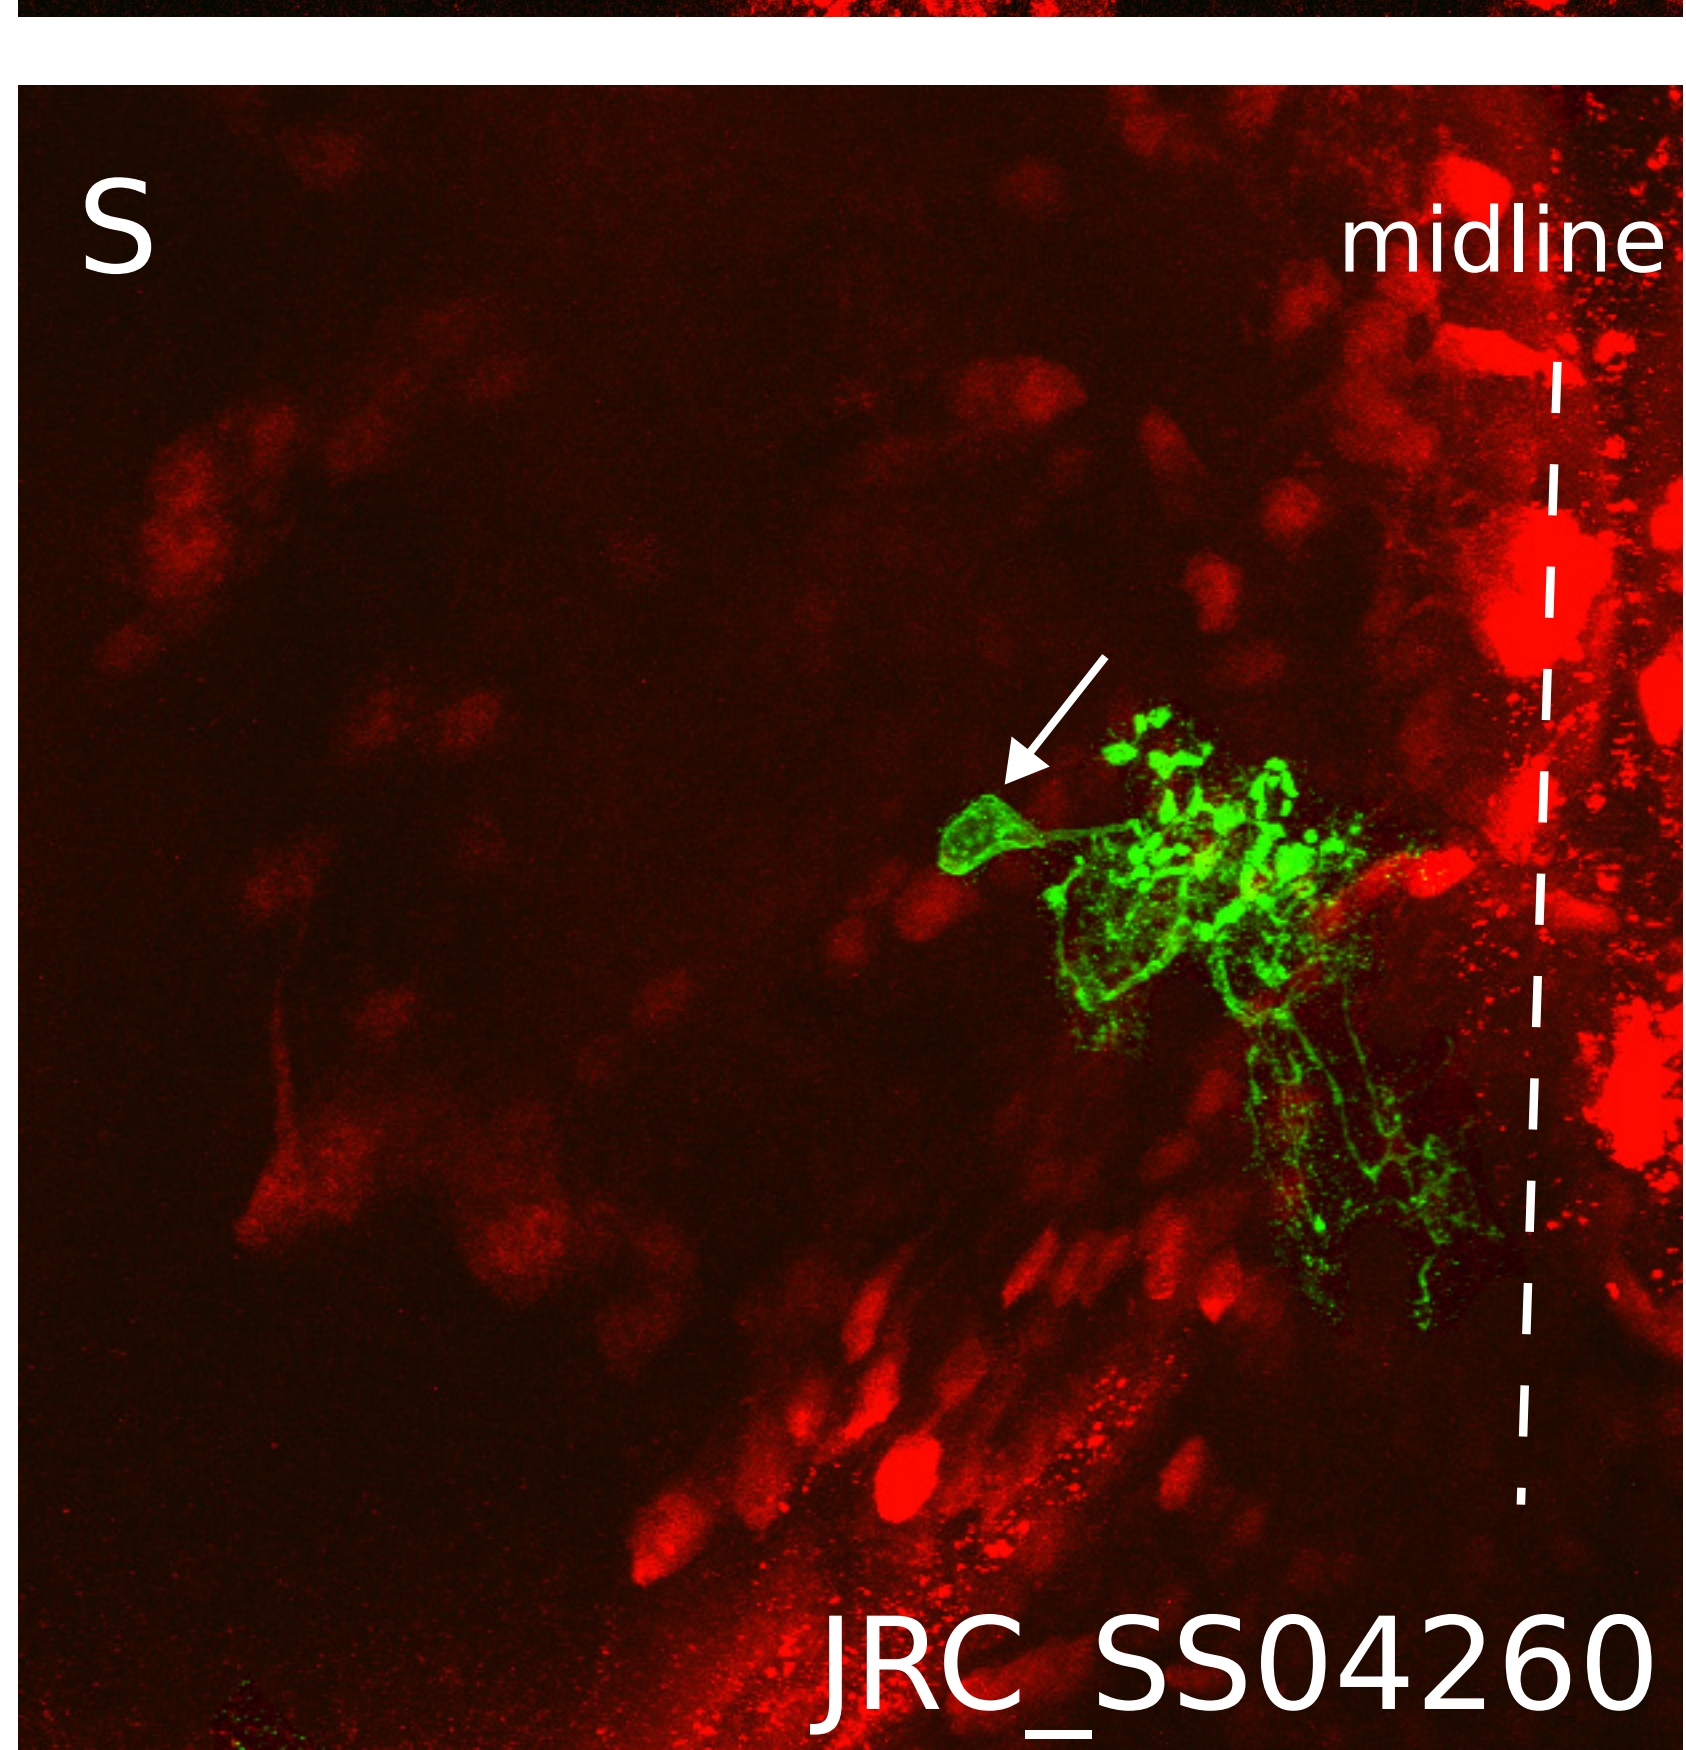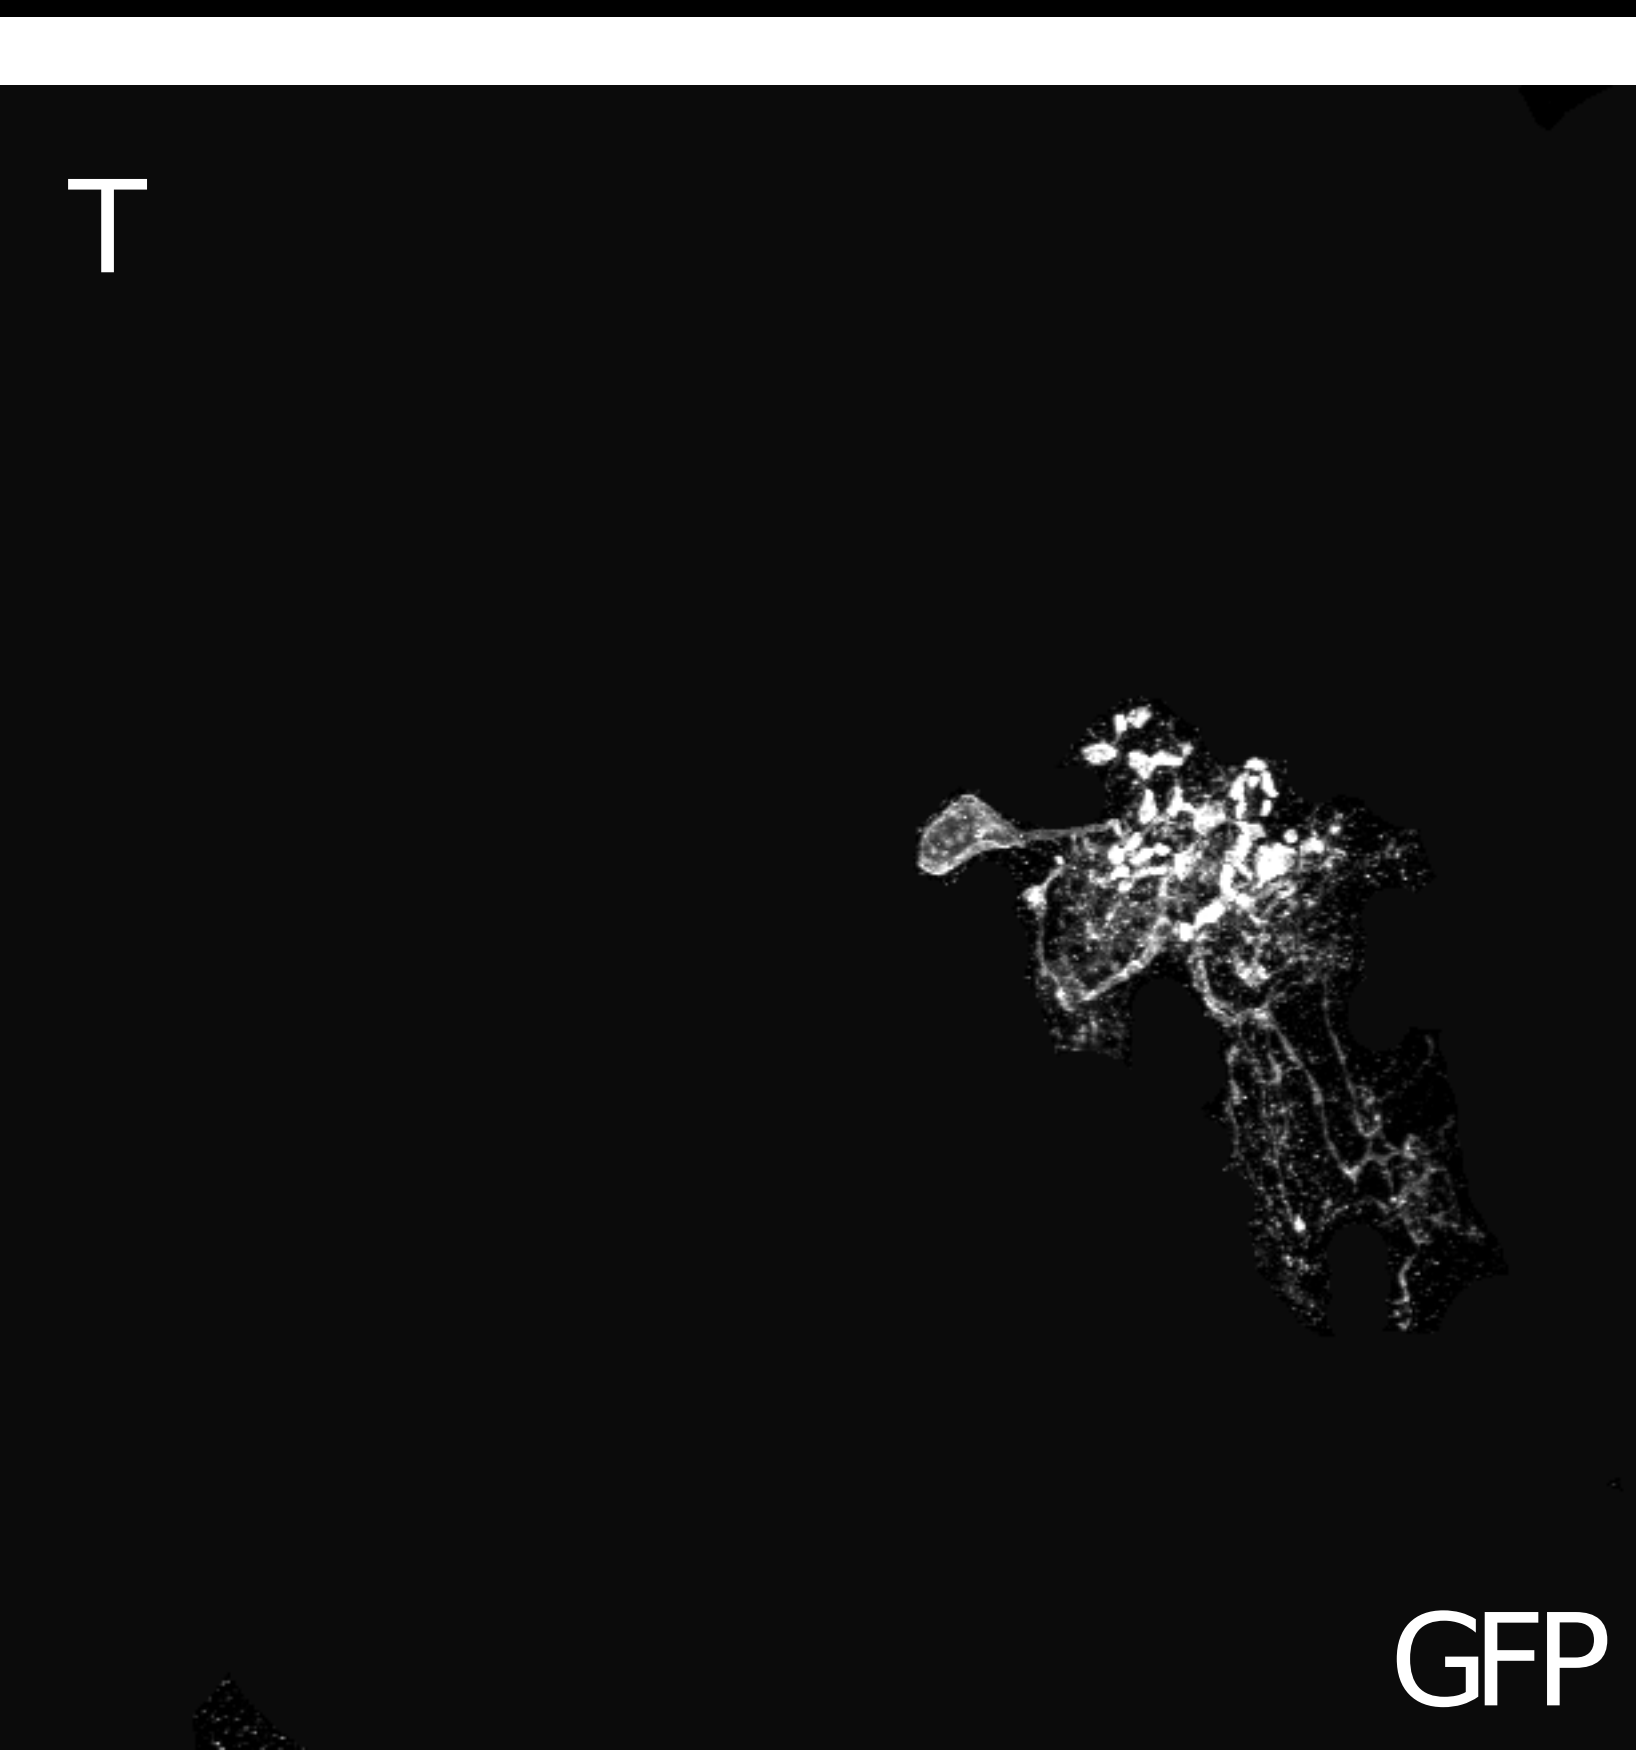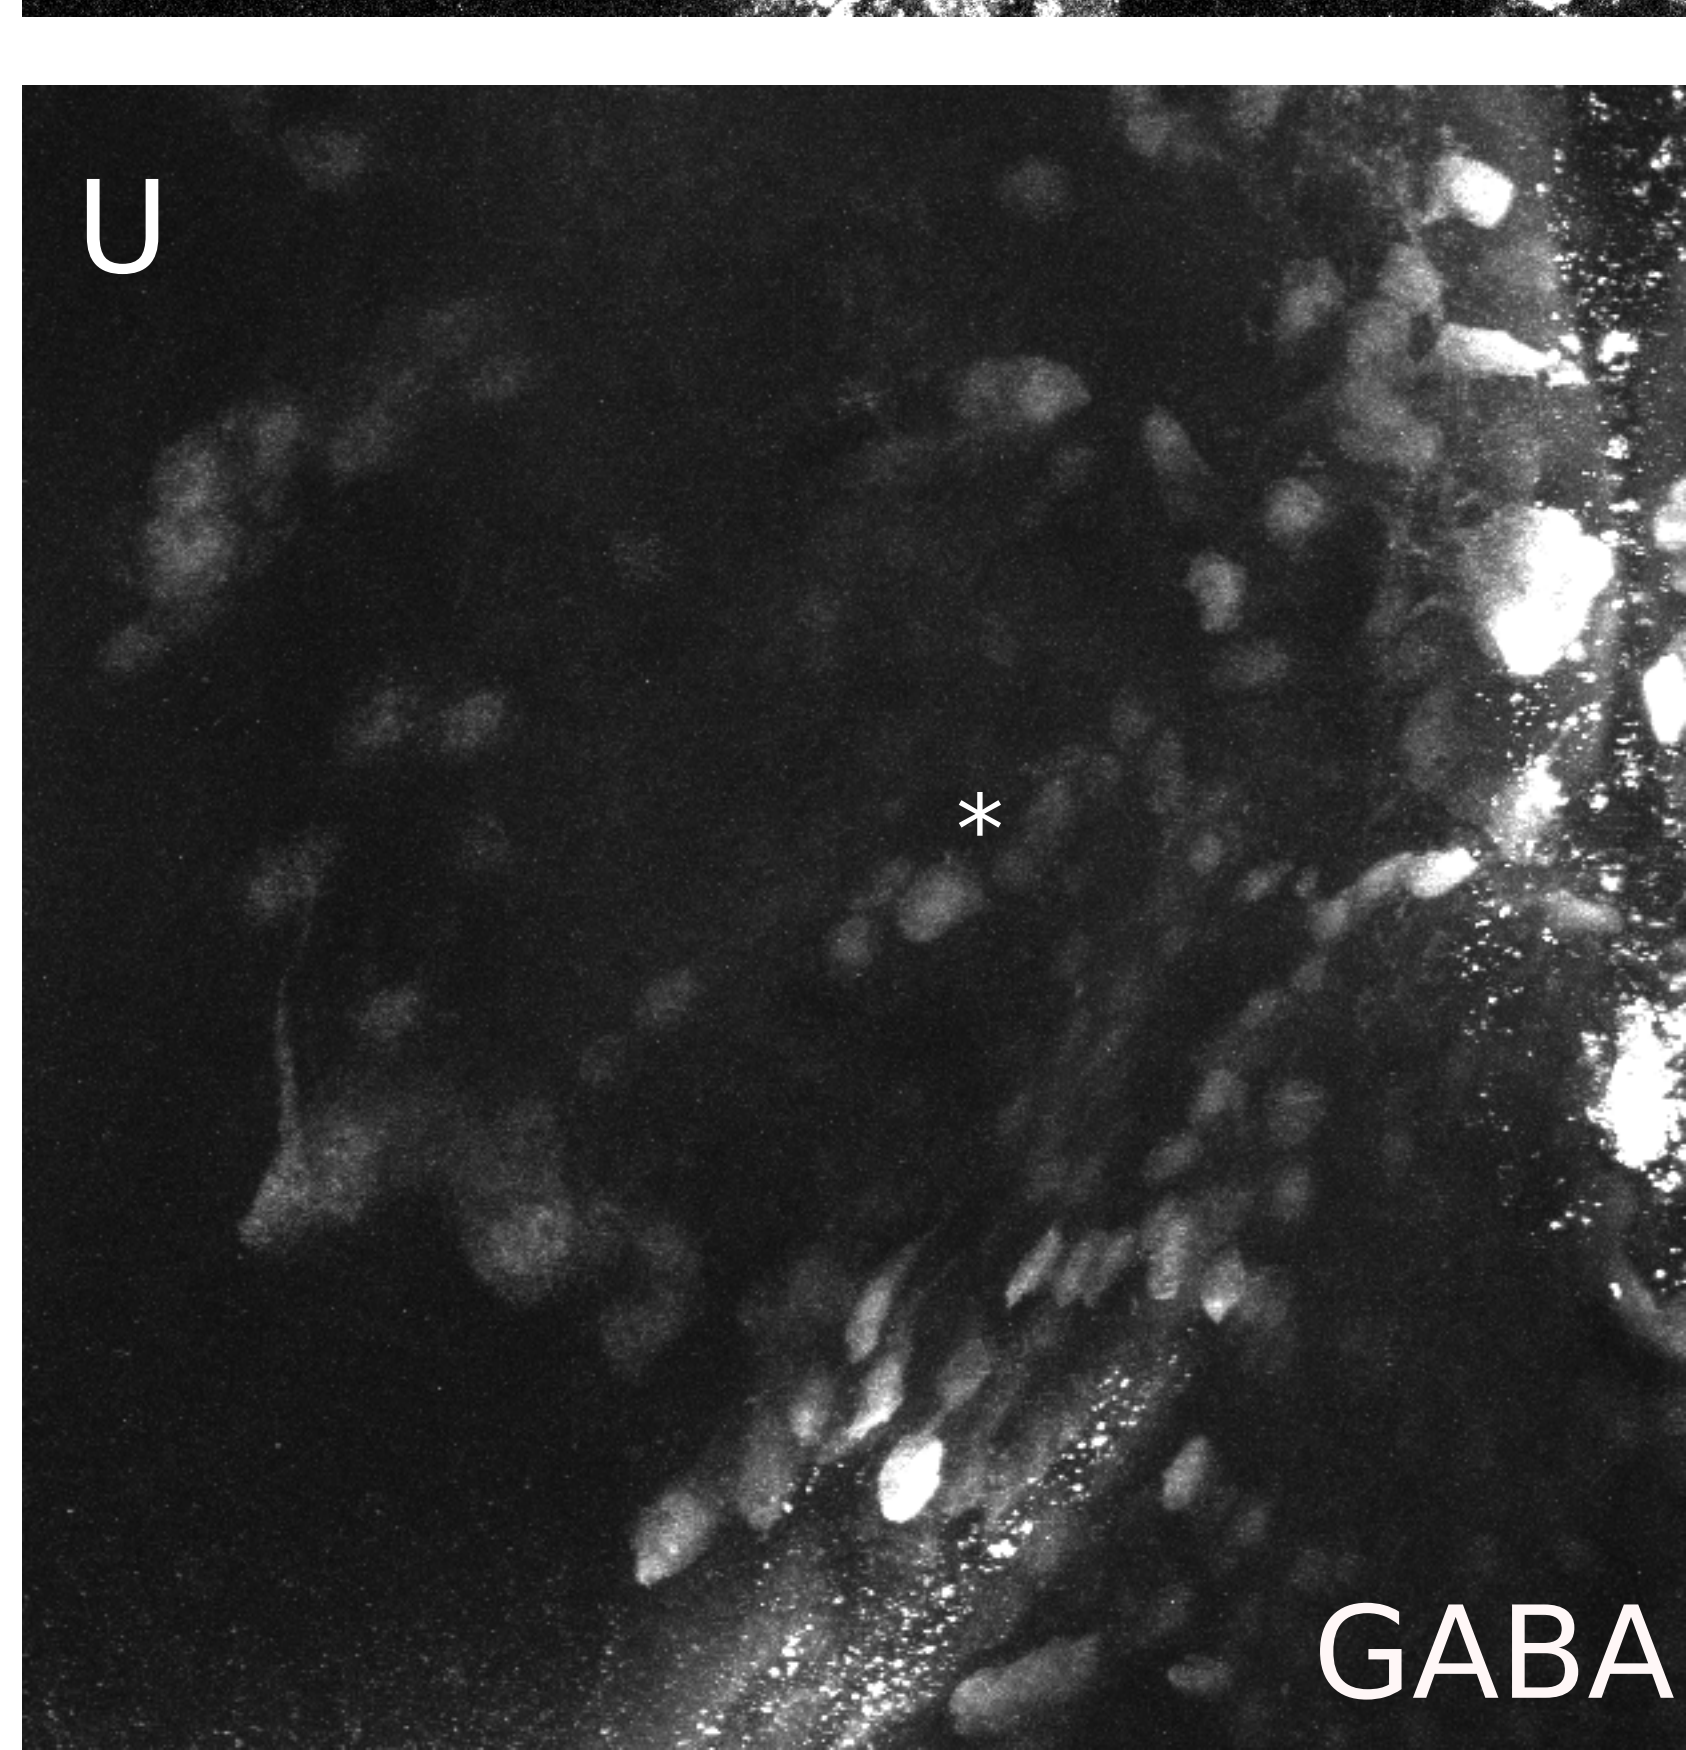

Supplement: supp [file elife-14859-supp-v1.zip]

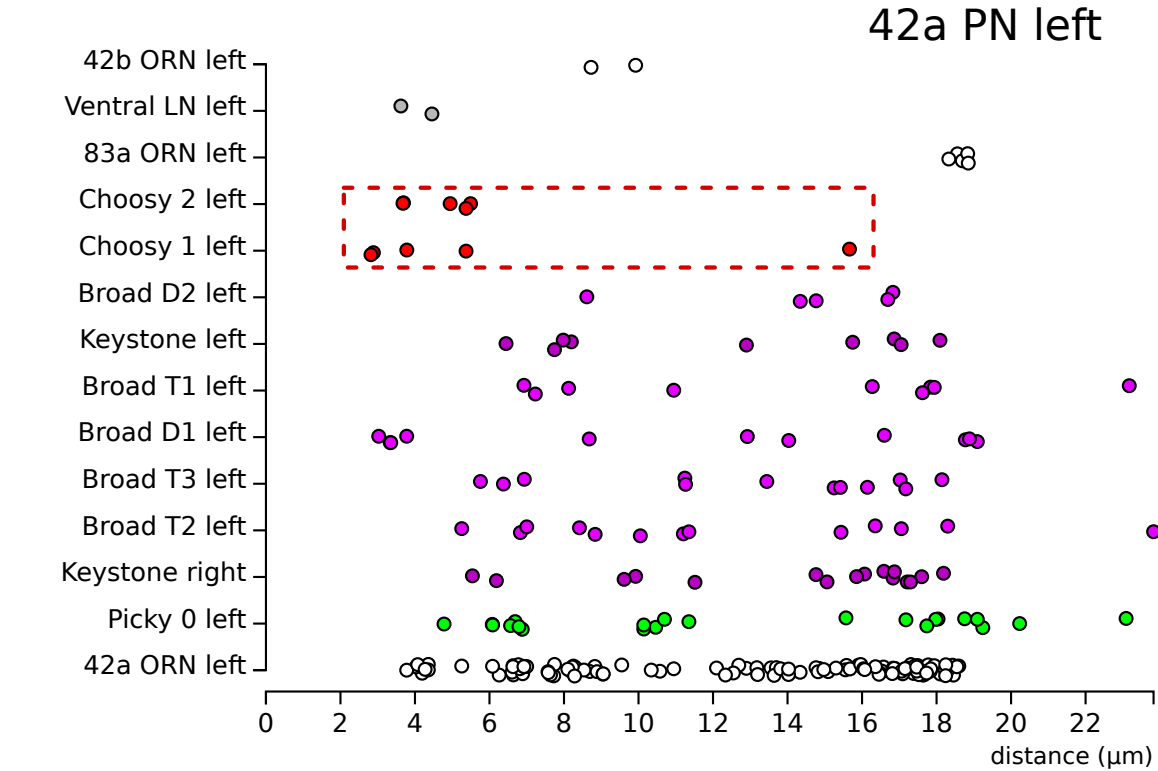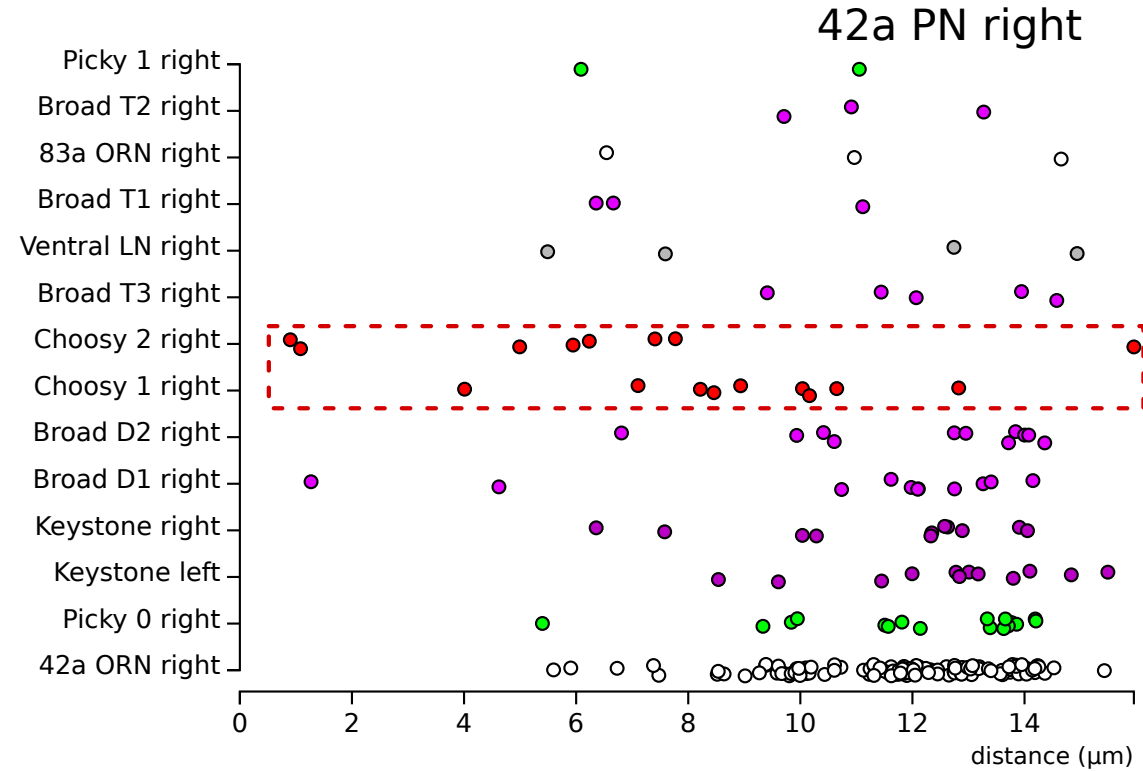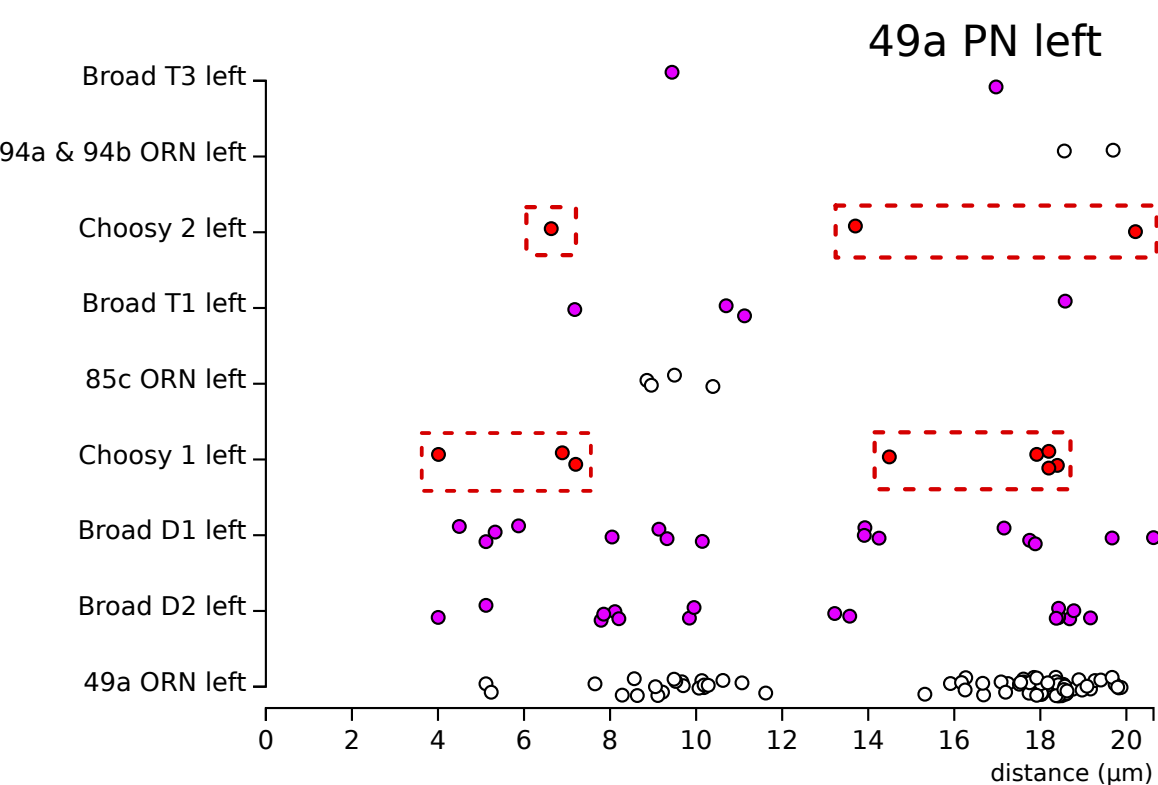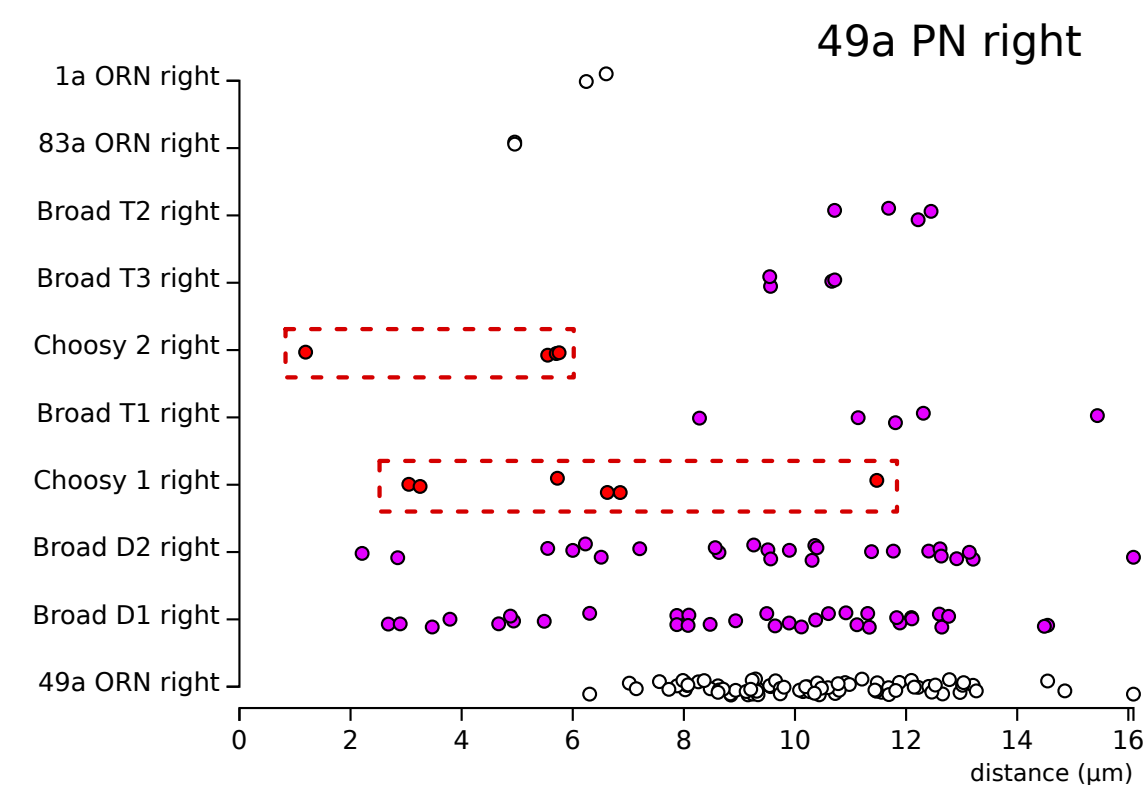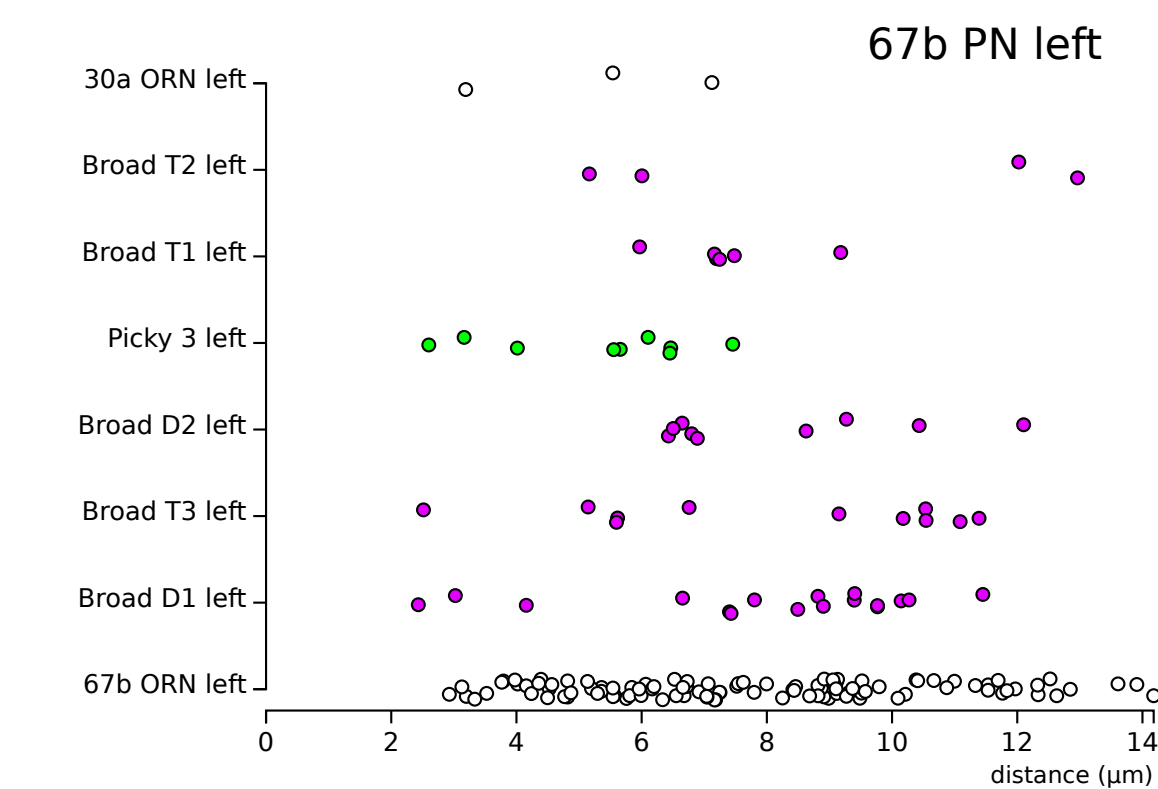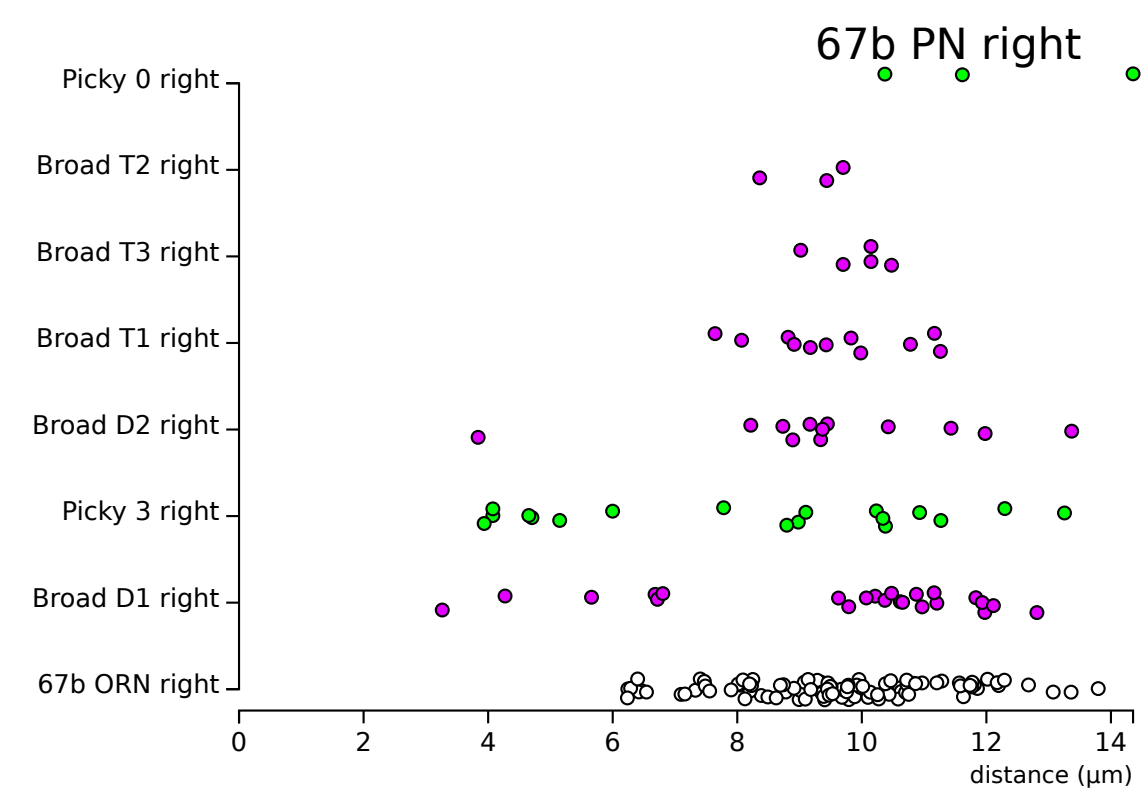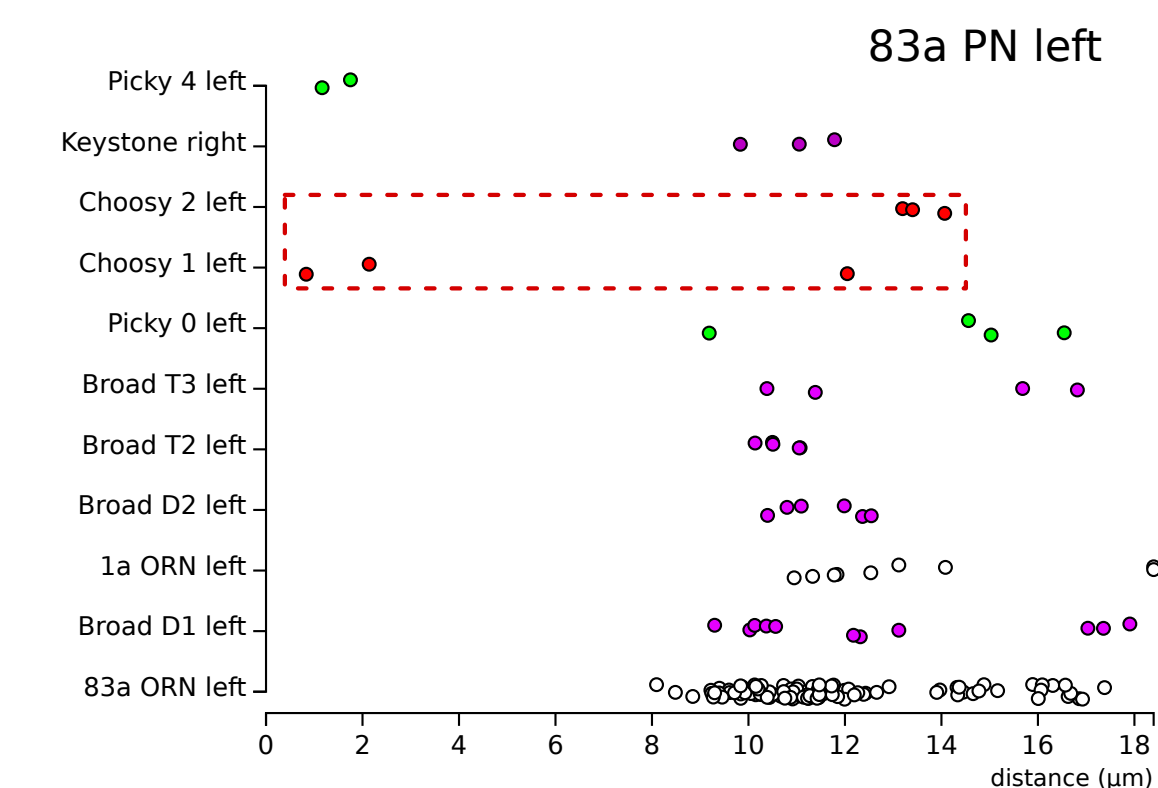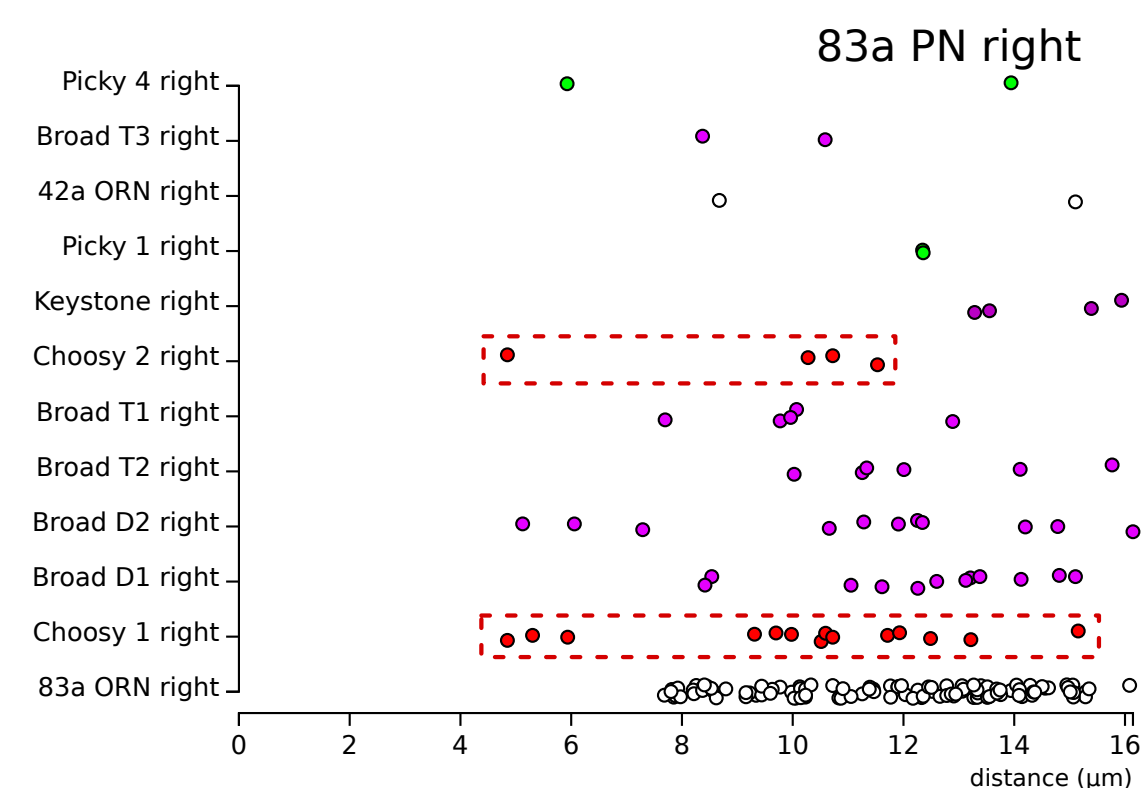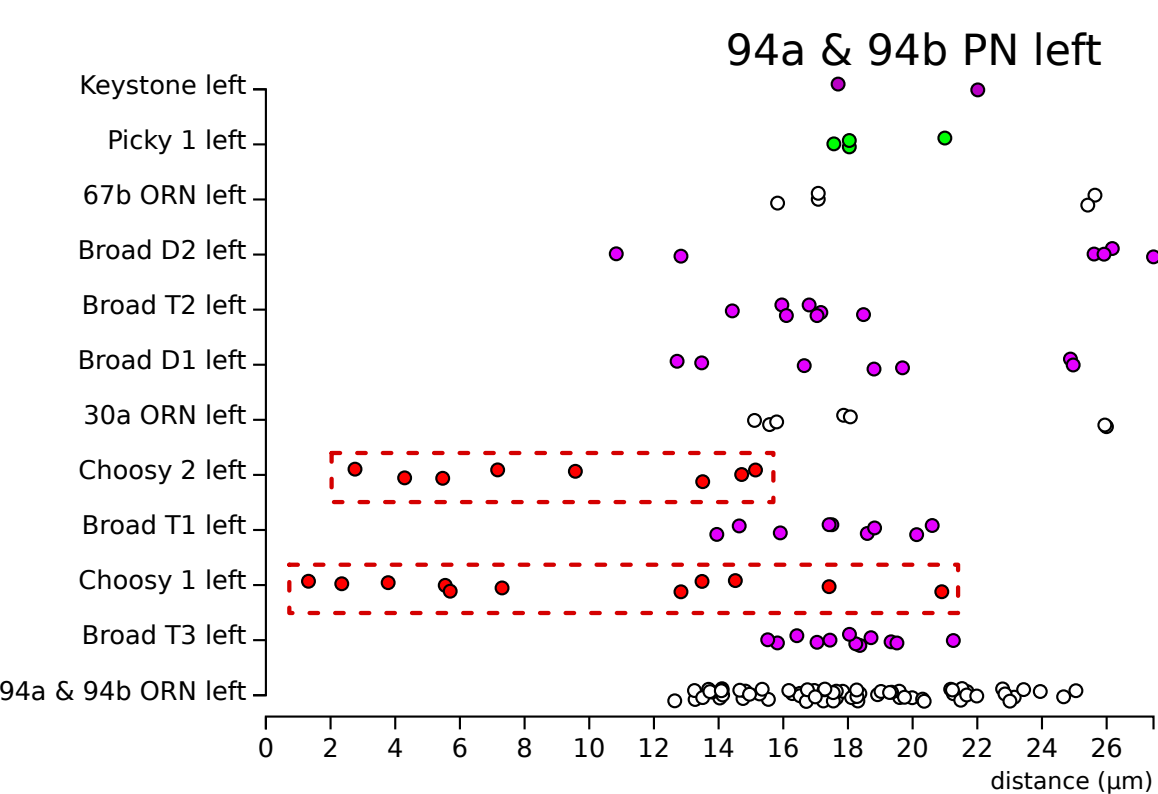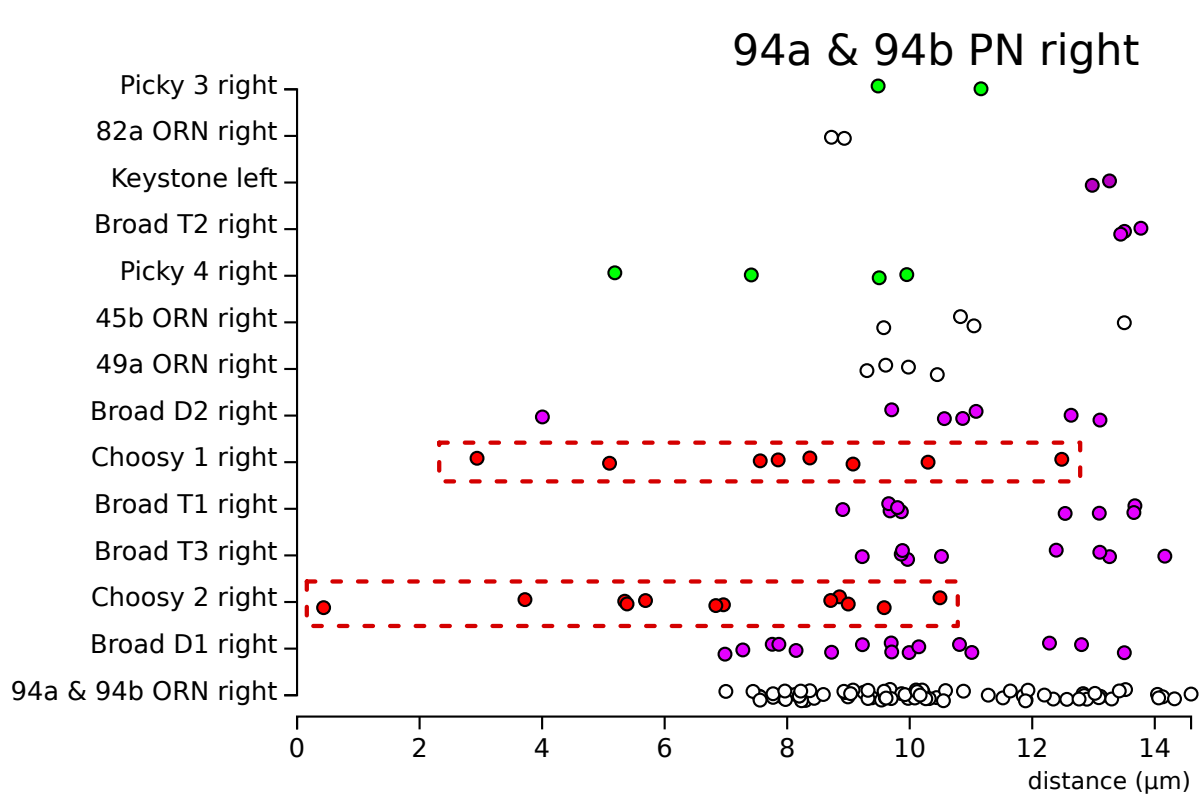

Supplement: supp [file elife-14859-supp-v1.zip]

## Anterior glomeruli

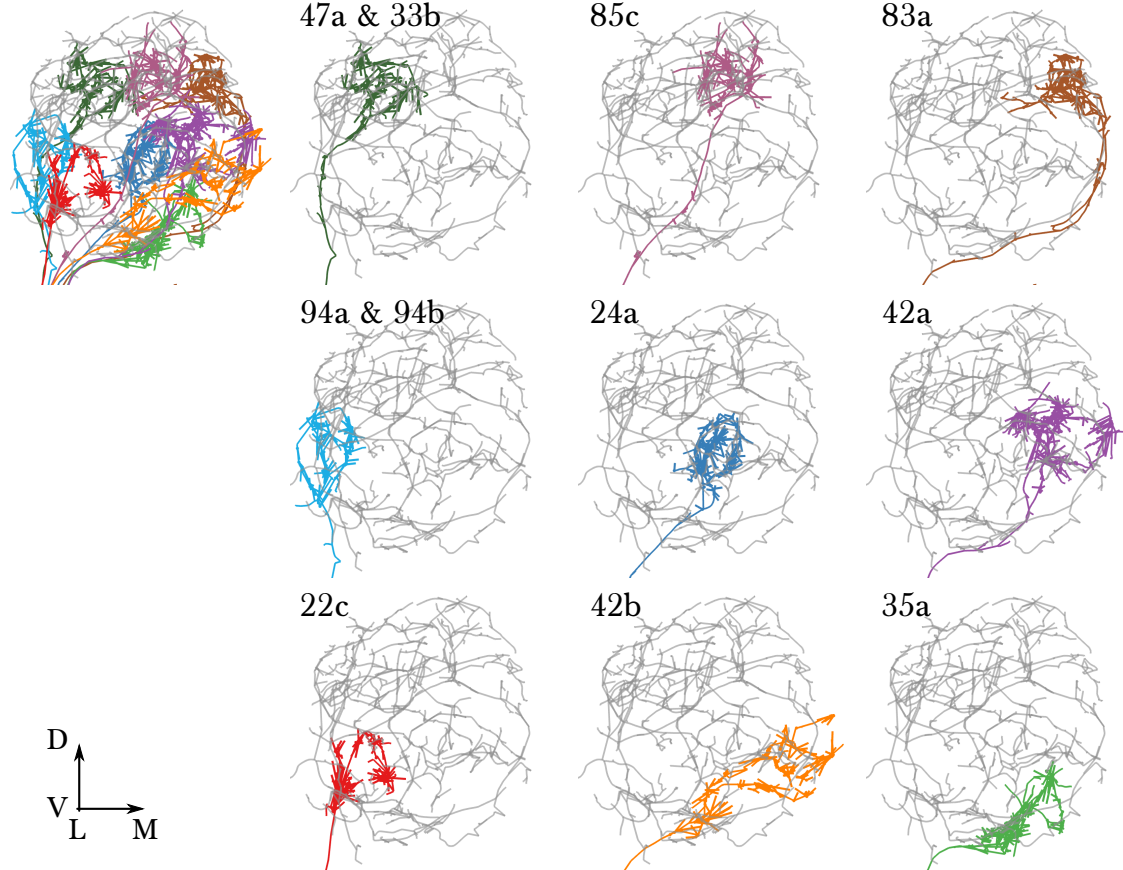

## Intermediate and posterior glomeruli

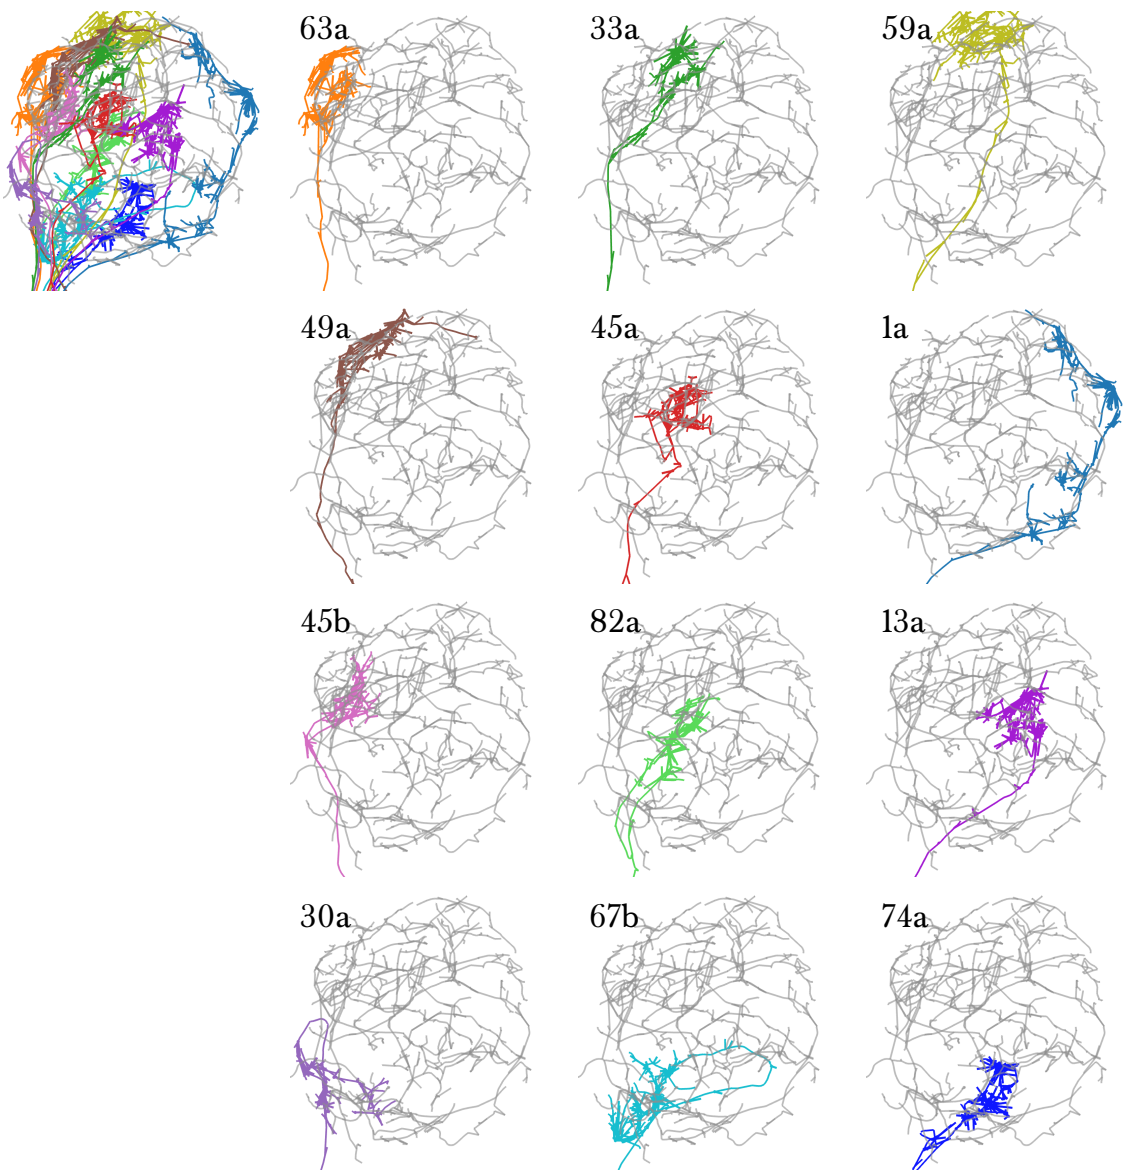

Supplement: supp [file elife-14859-supp-v1.zip]

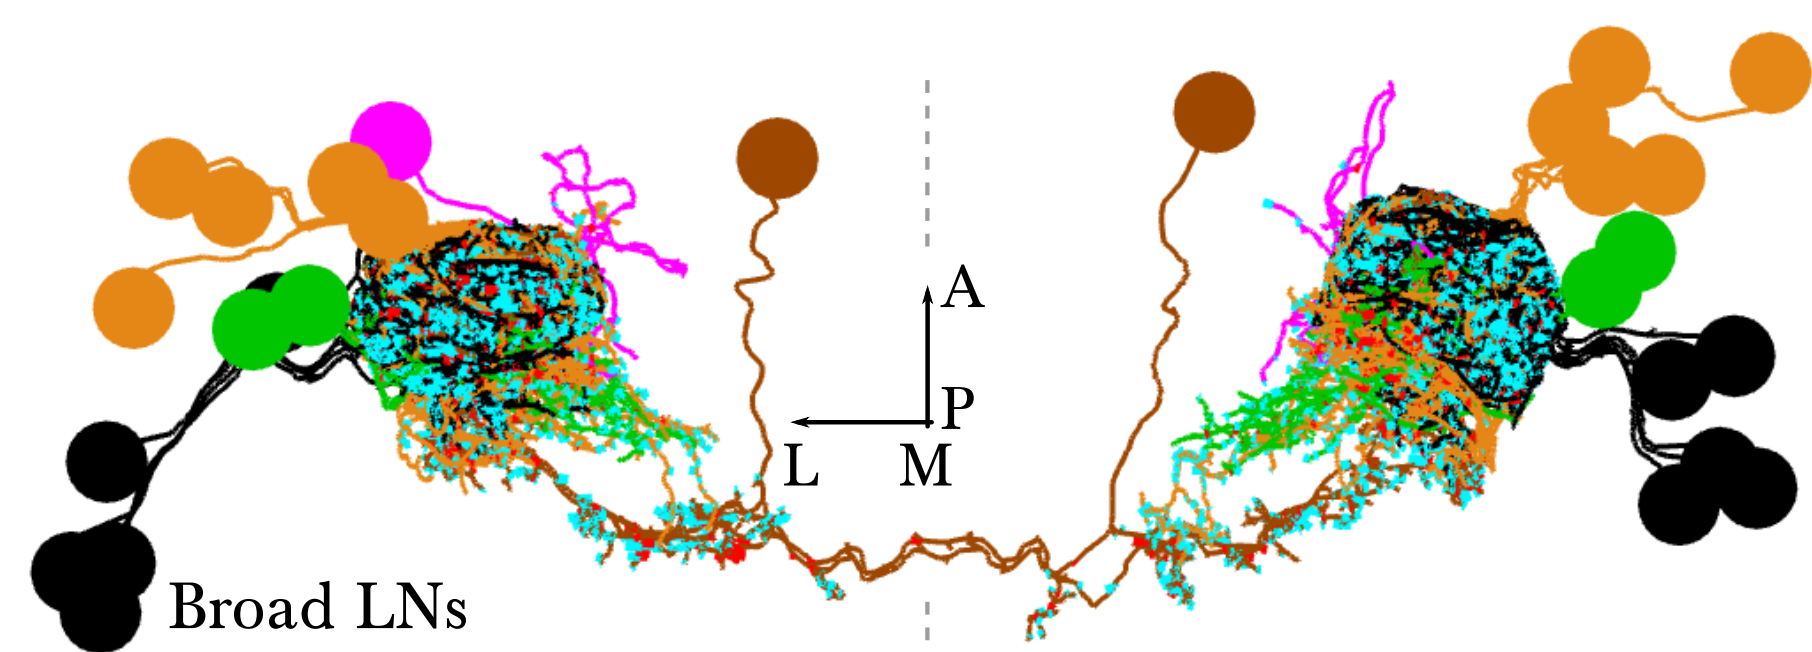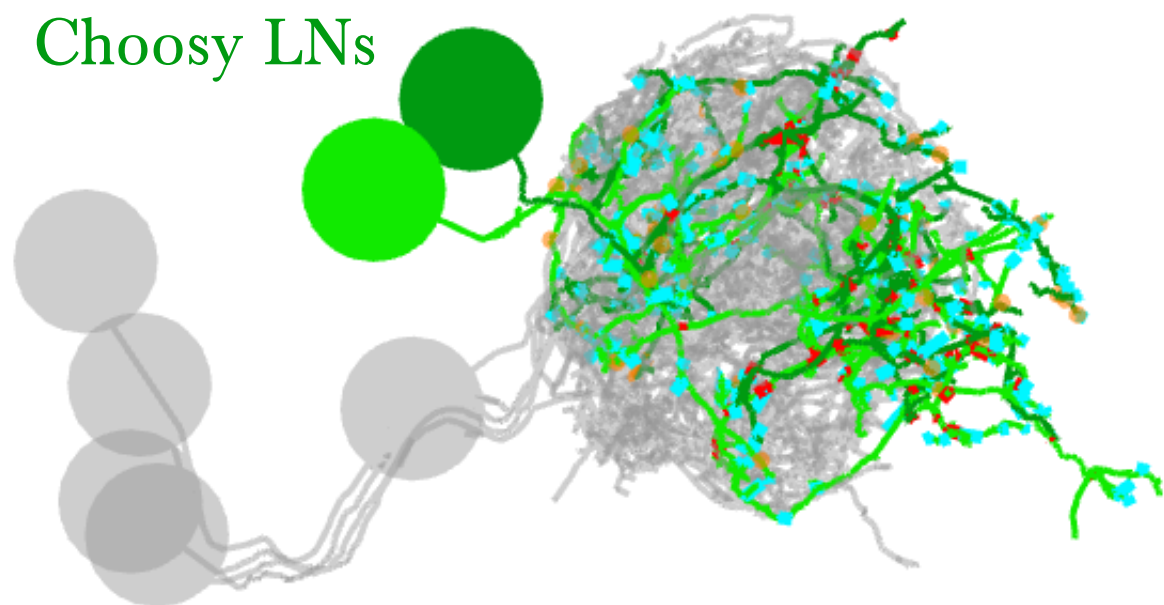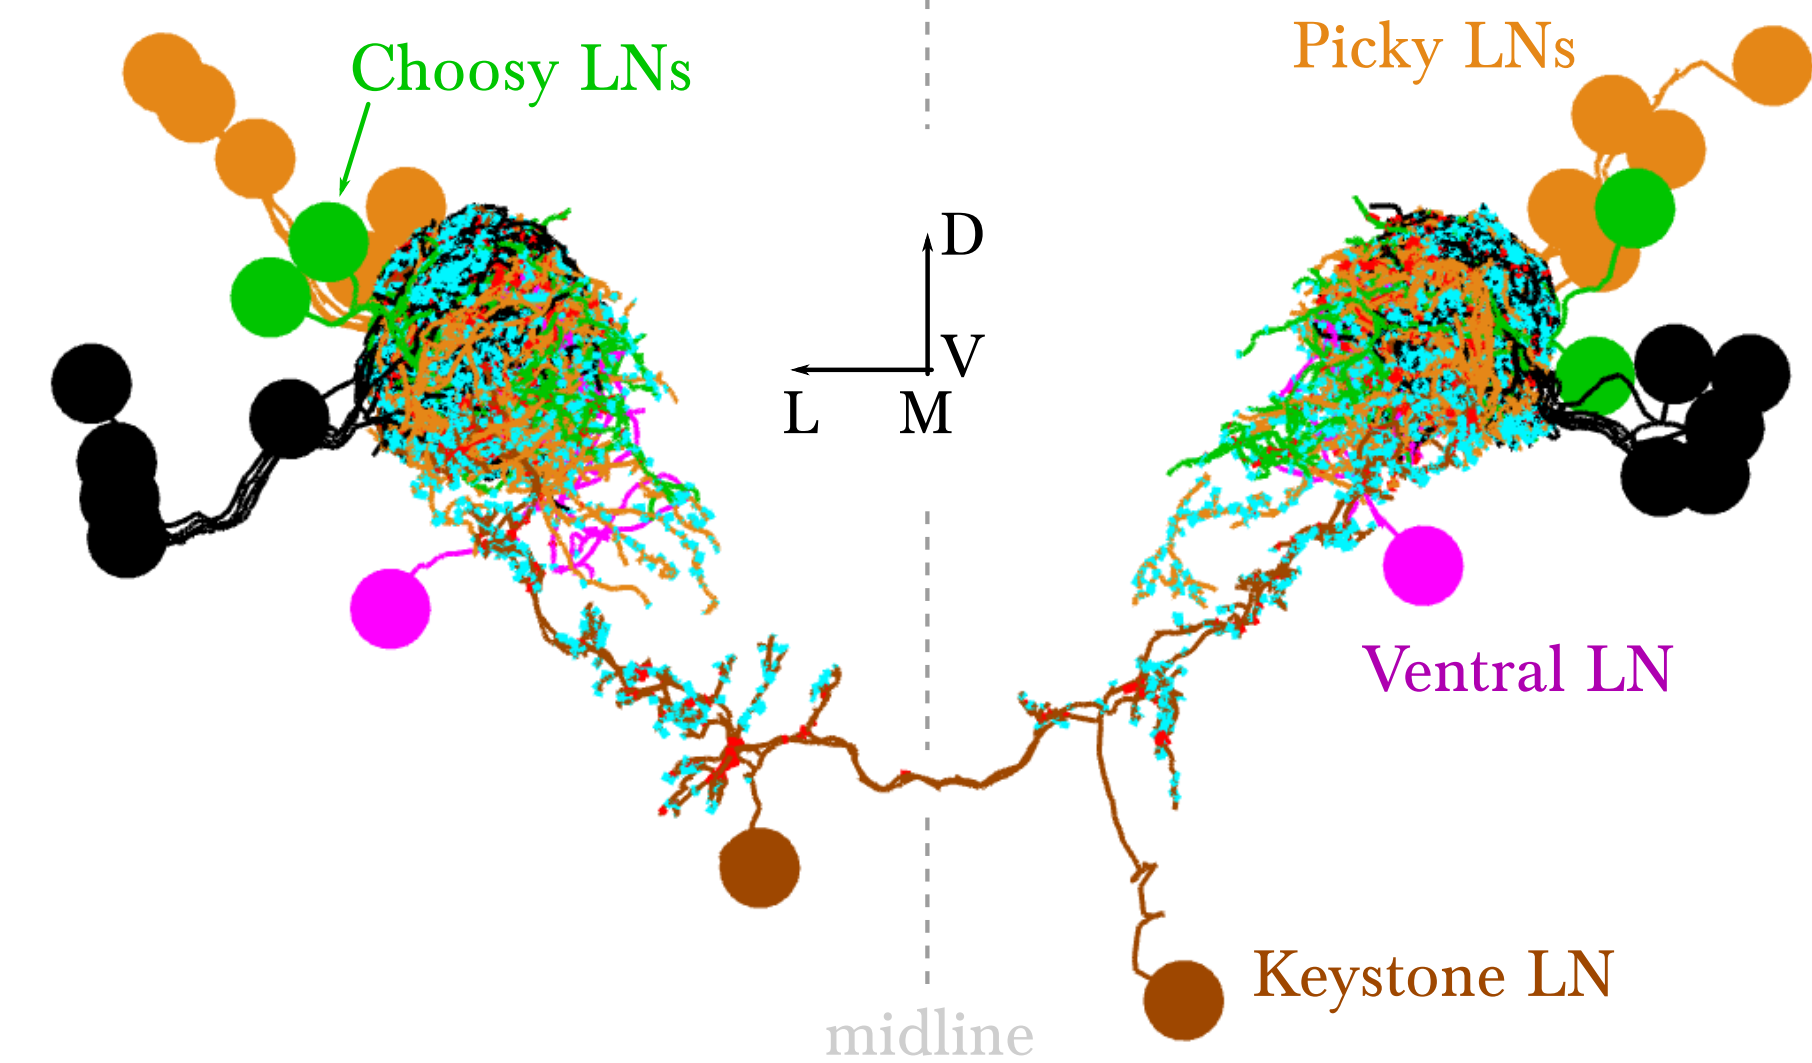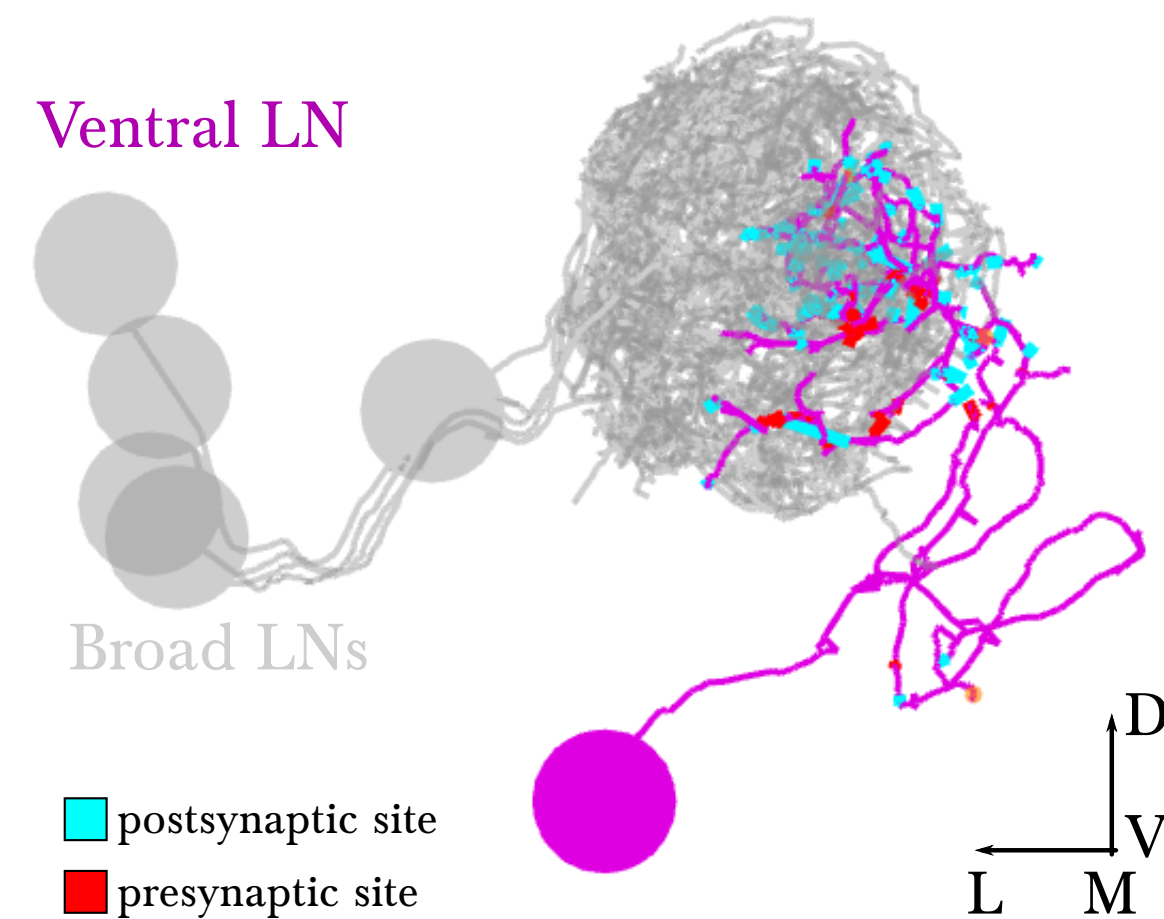

Supplement: supp [file elife-14859-supp-v1.zip]
